# Supplementary material for: Stereoselective synthesis of 2-dienyl-substituted piperidines using an η4-dienetricarbonyliron complex as the stereocontrolling element in a double reductive amination cascade
Source: Royal Society of Chemistry journal article supplement (doi:10.1039/b710898b), 2007-01-01

**Stereoselective Synthesis of 2-Dienyl-Substituted Piperidines using an  $\eta^4$ -  
Dienetricarbonyliron Complex as the Stereocontrolling Element in a Double Reductive  
Amination Cascade**

Iwan Williams, Keith Reeves, Benson M. Kariuki and Liam R. Cox

**Supporting Information:**  $^1\text{H}$ -nmr and  $^{13}\text{C}$ -nmr data

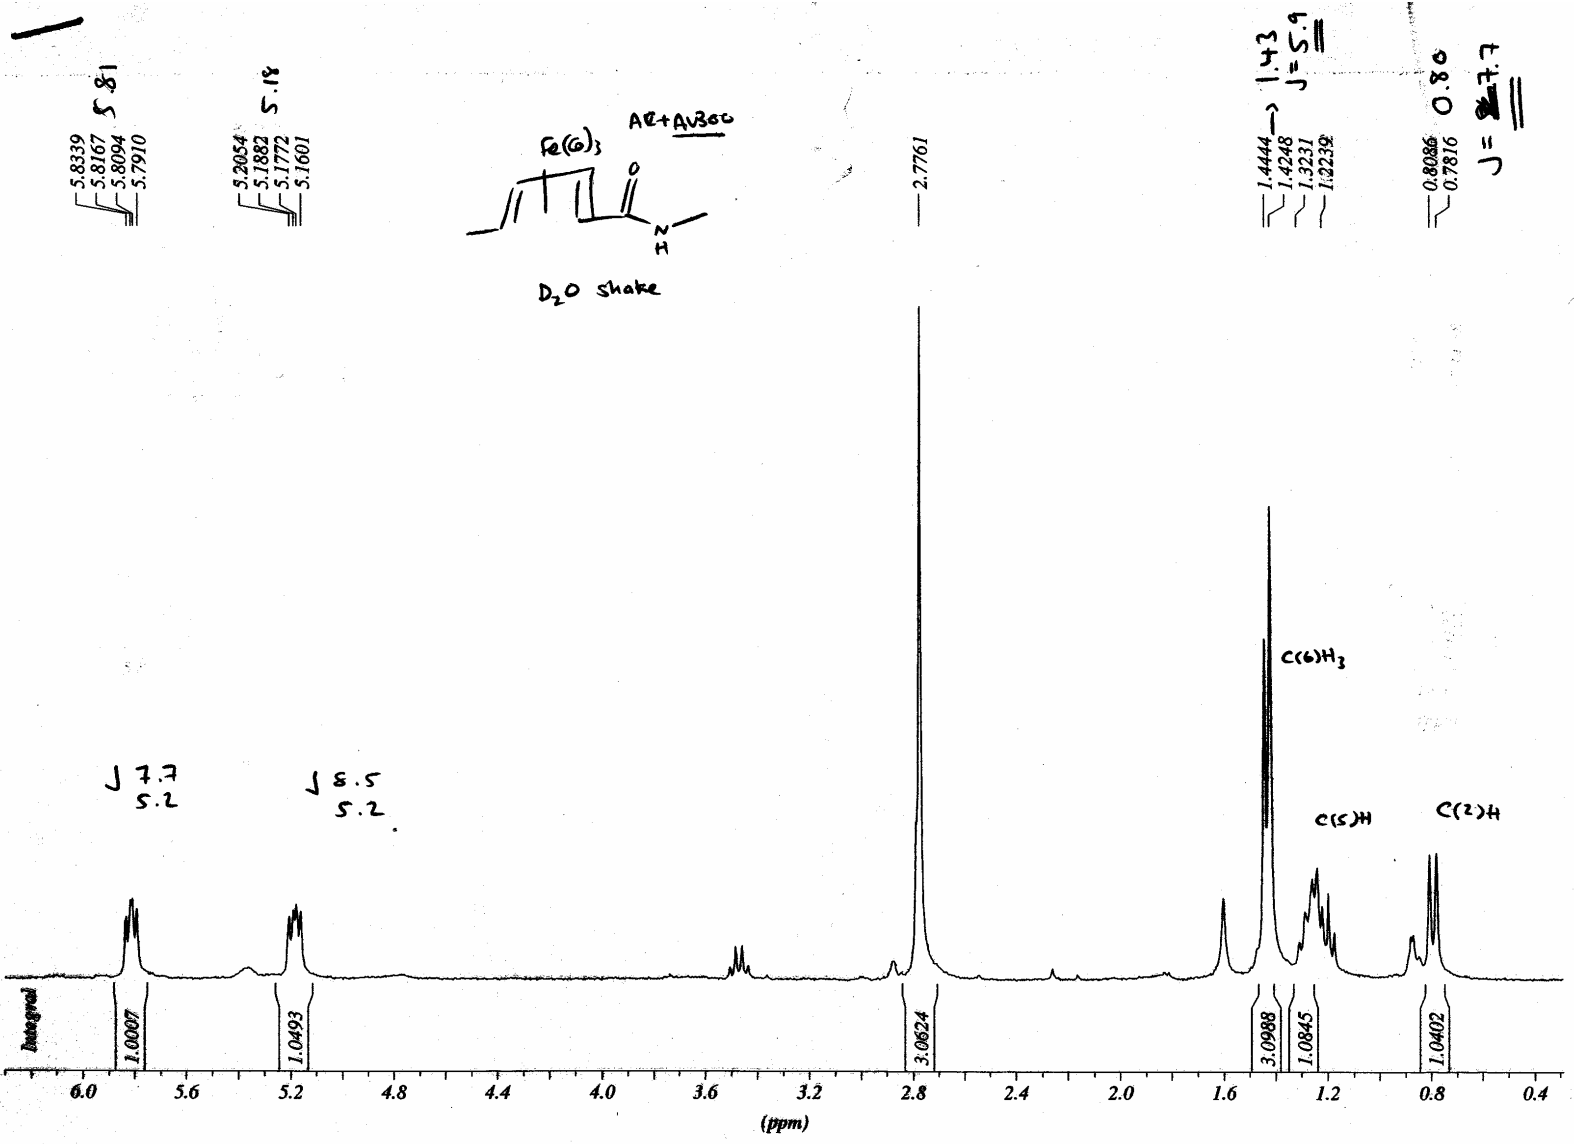

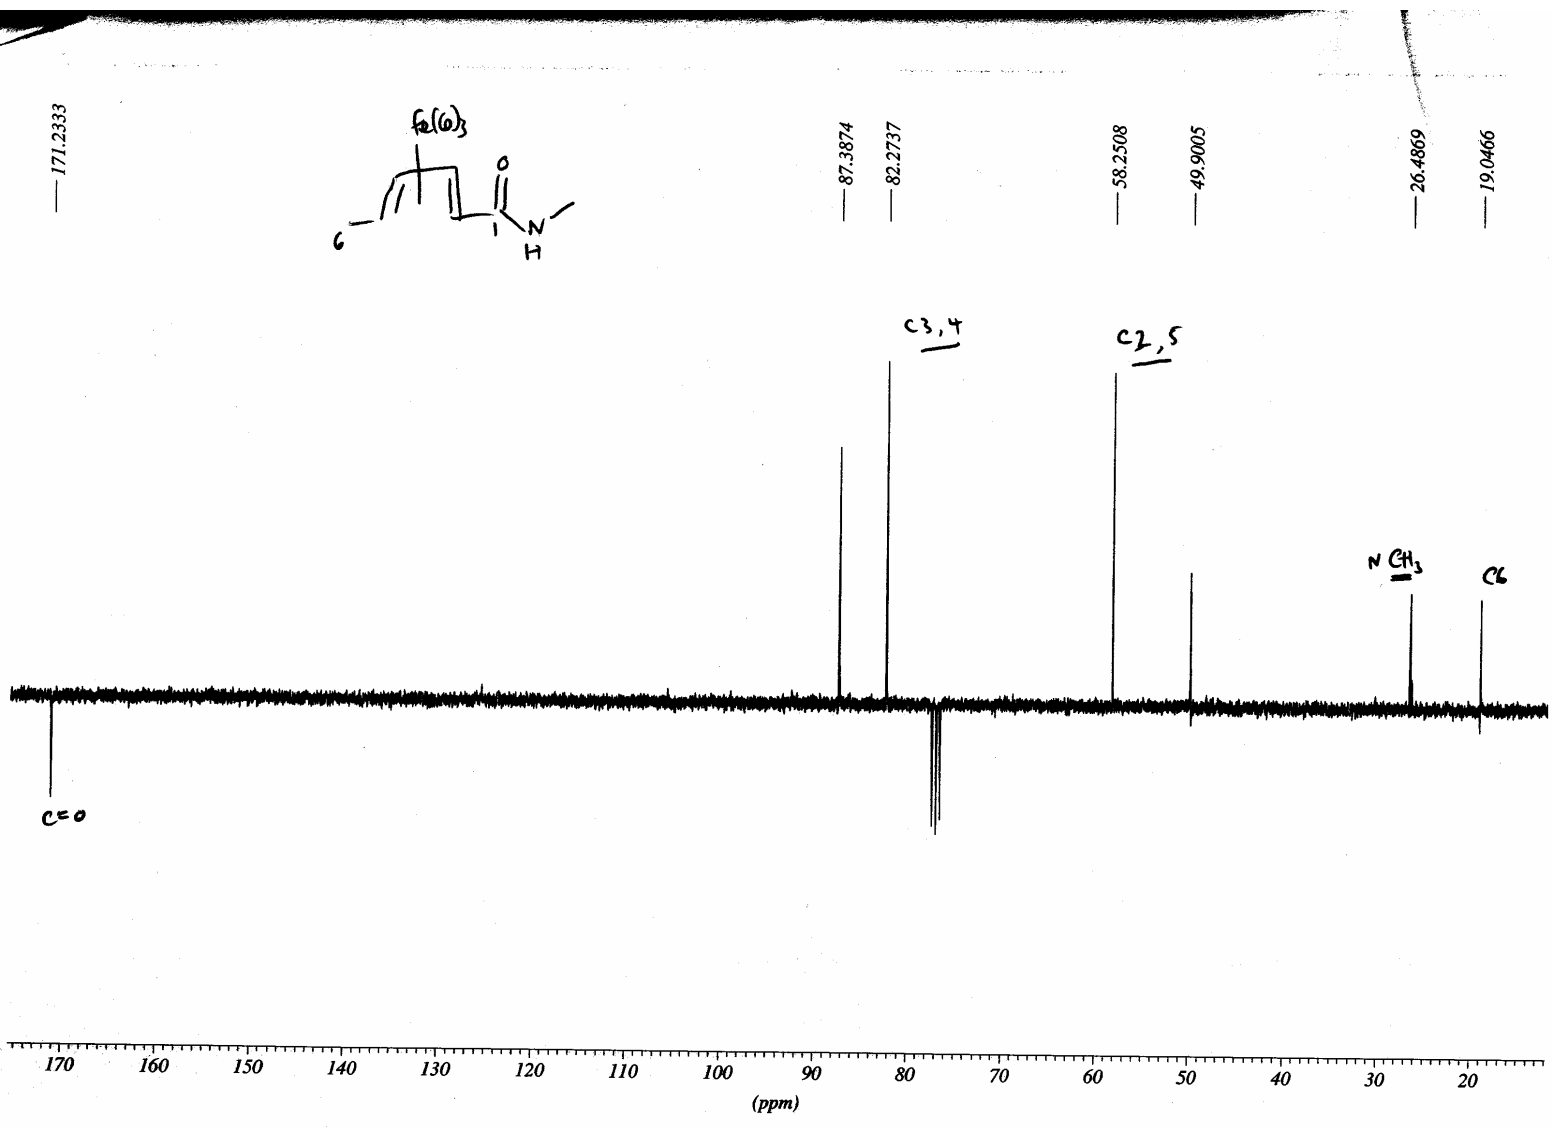

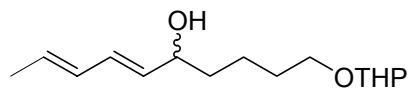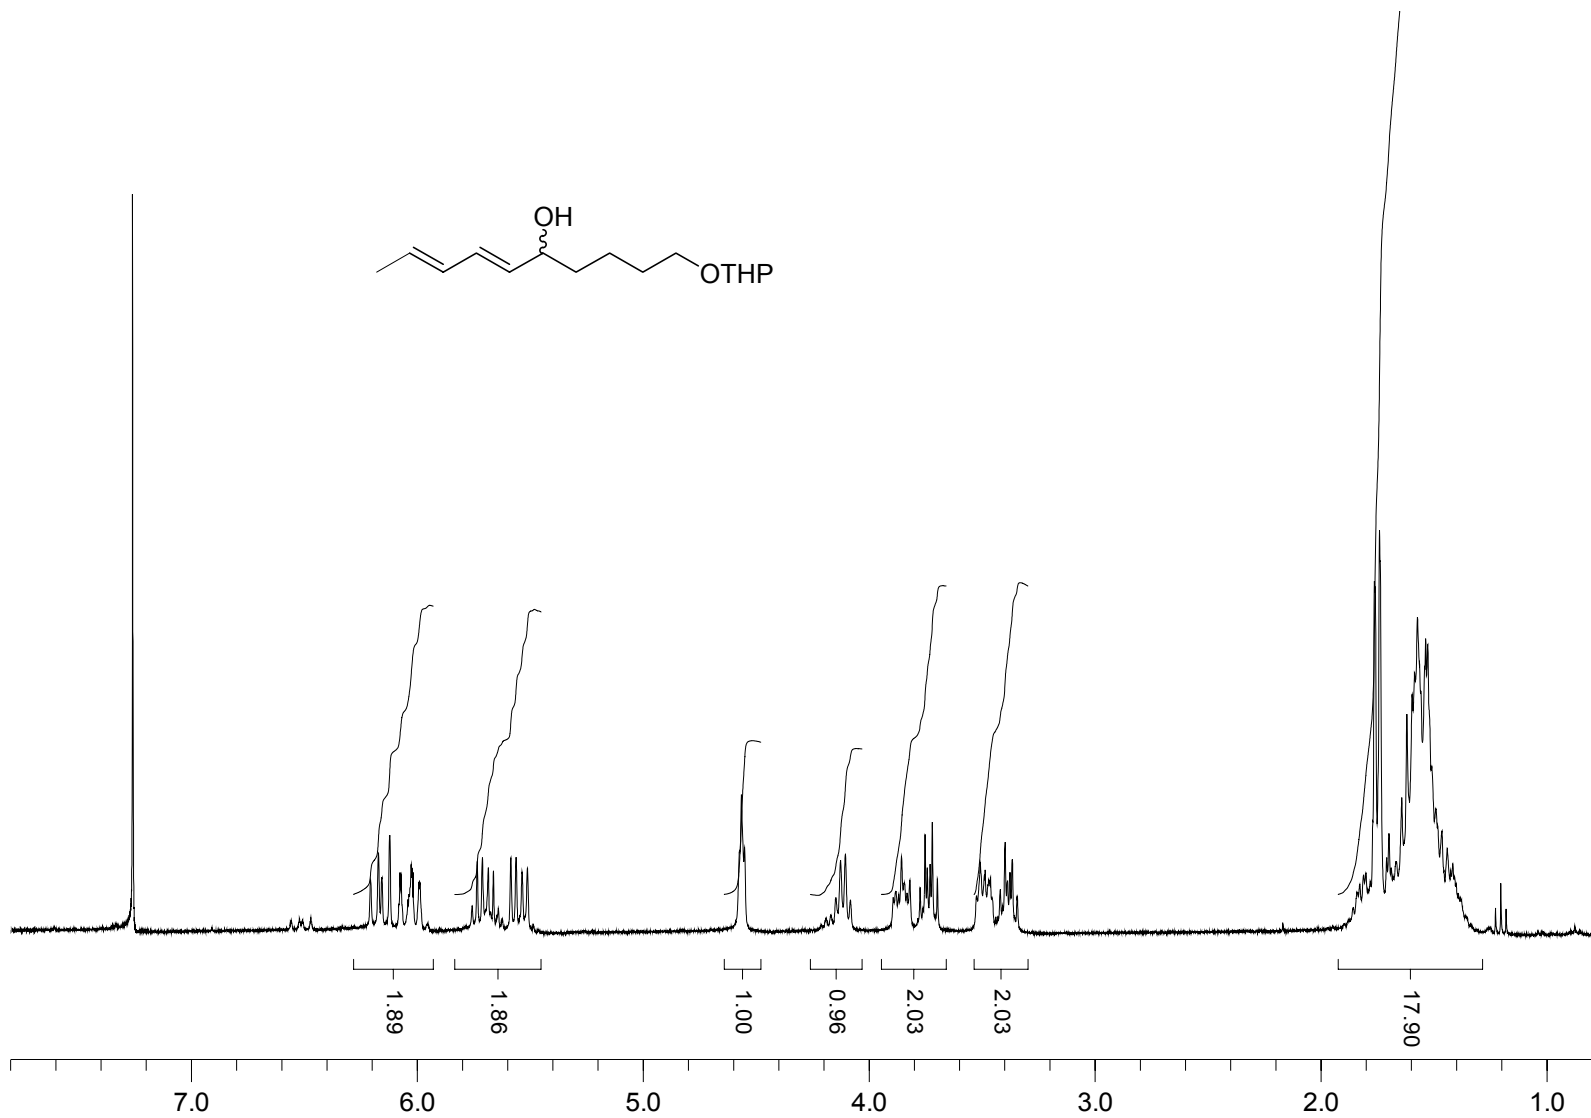

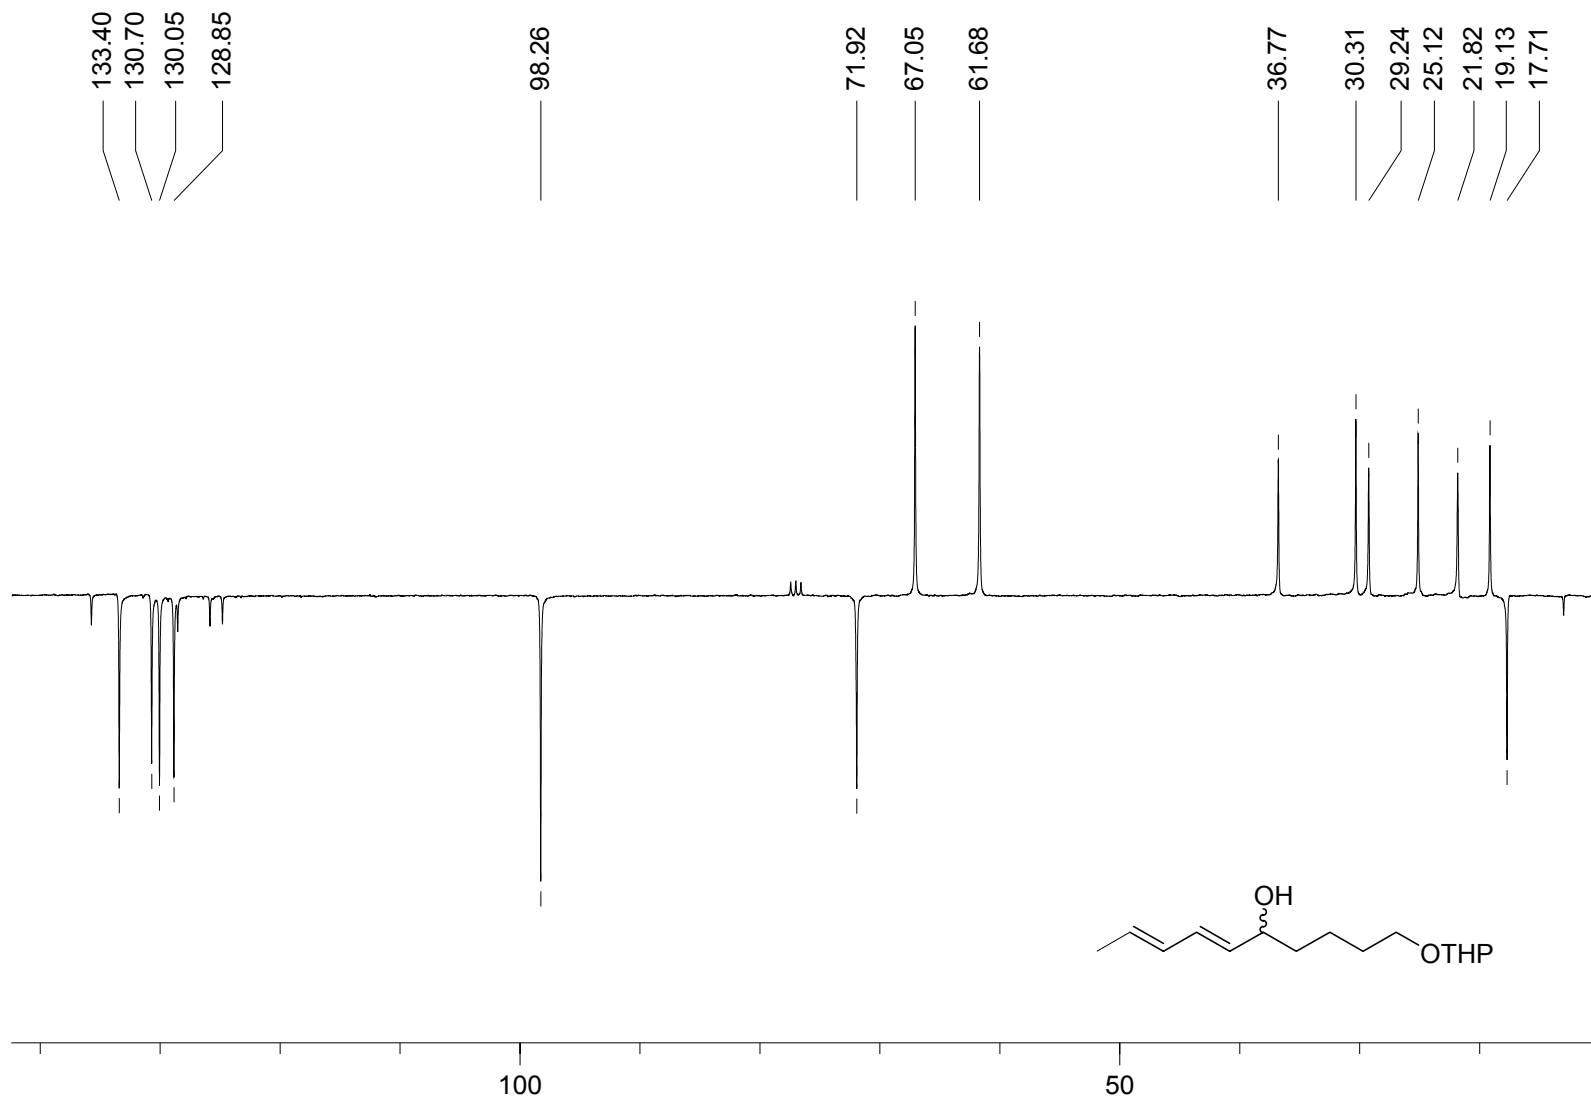

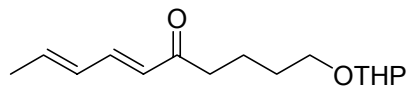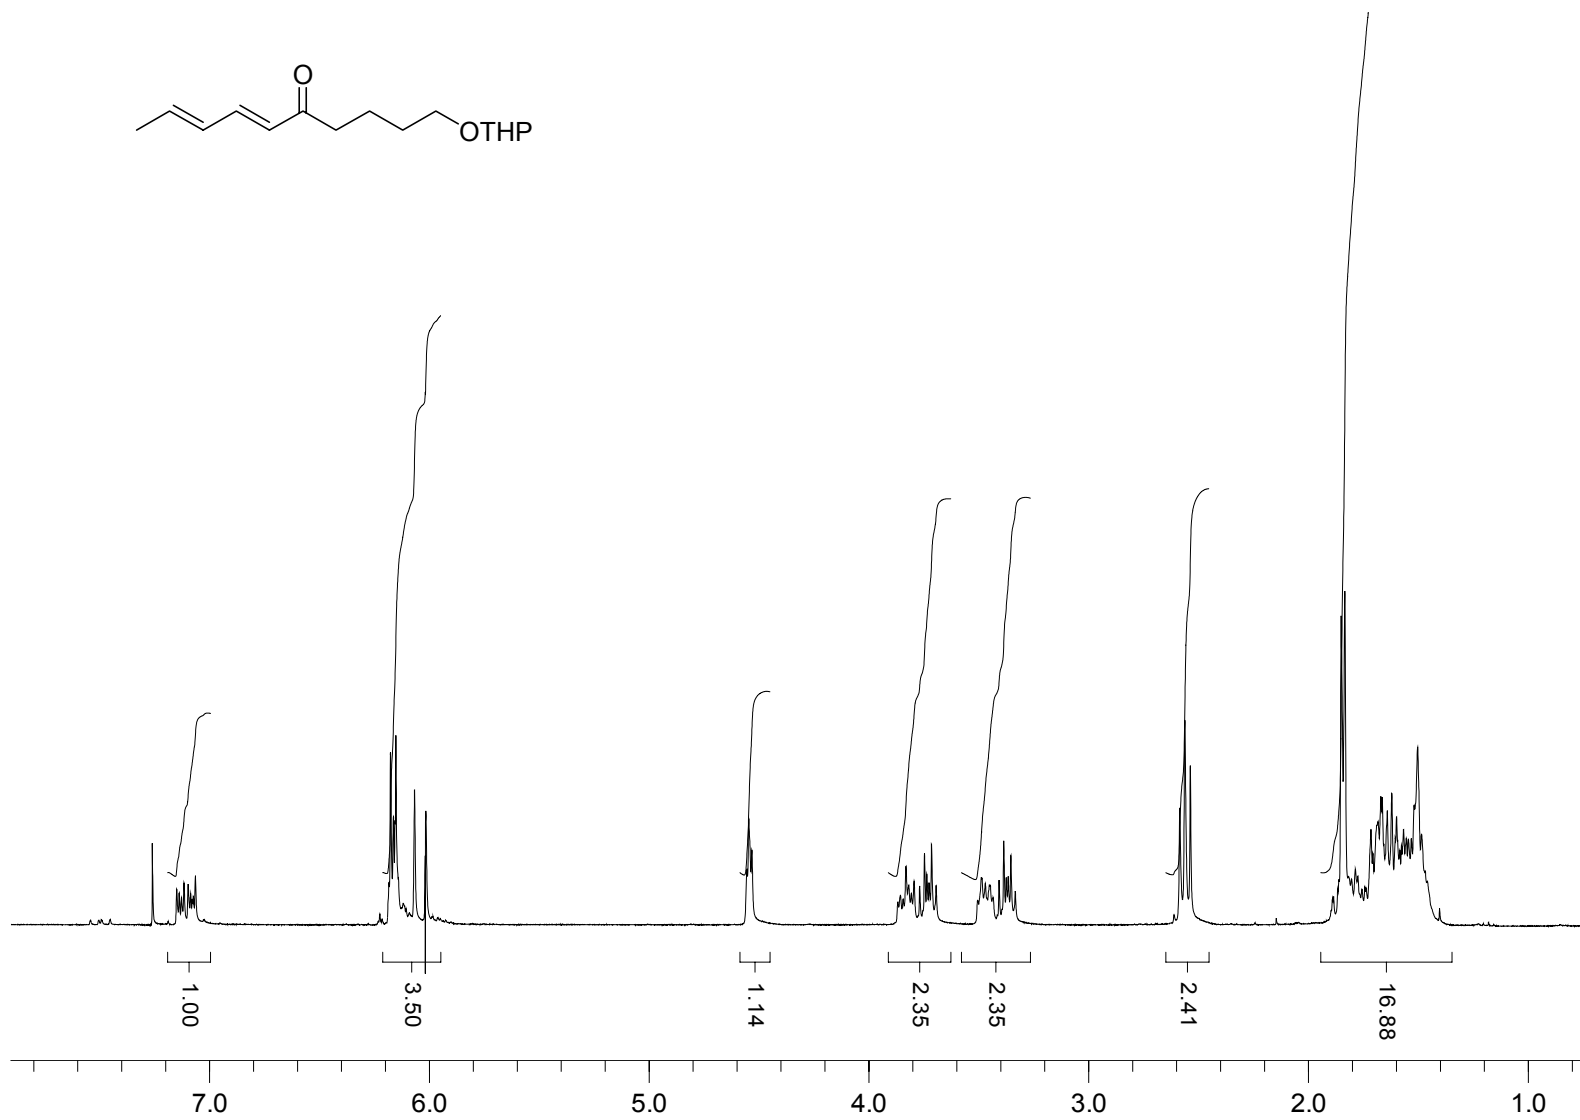

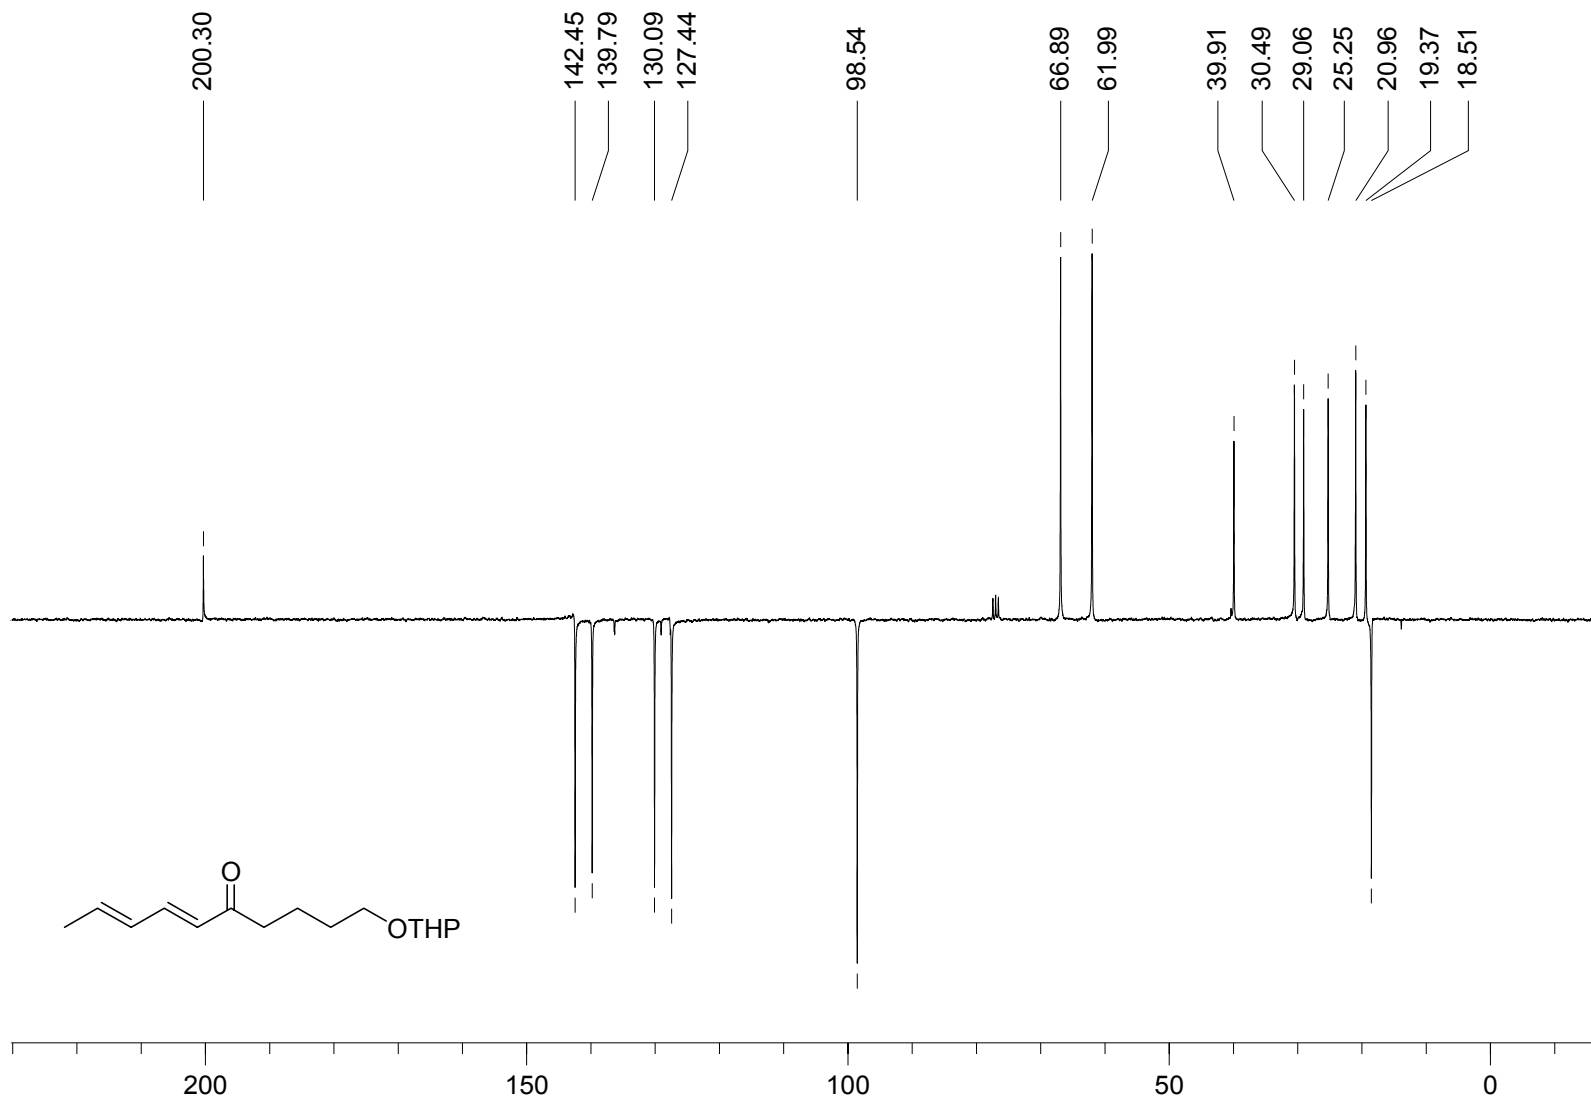

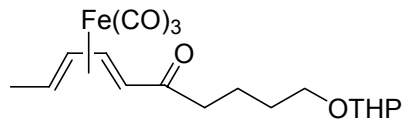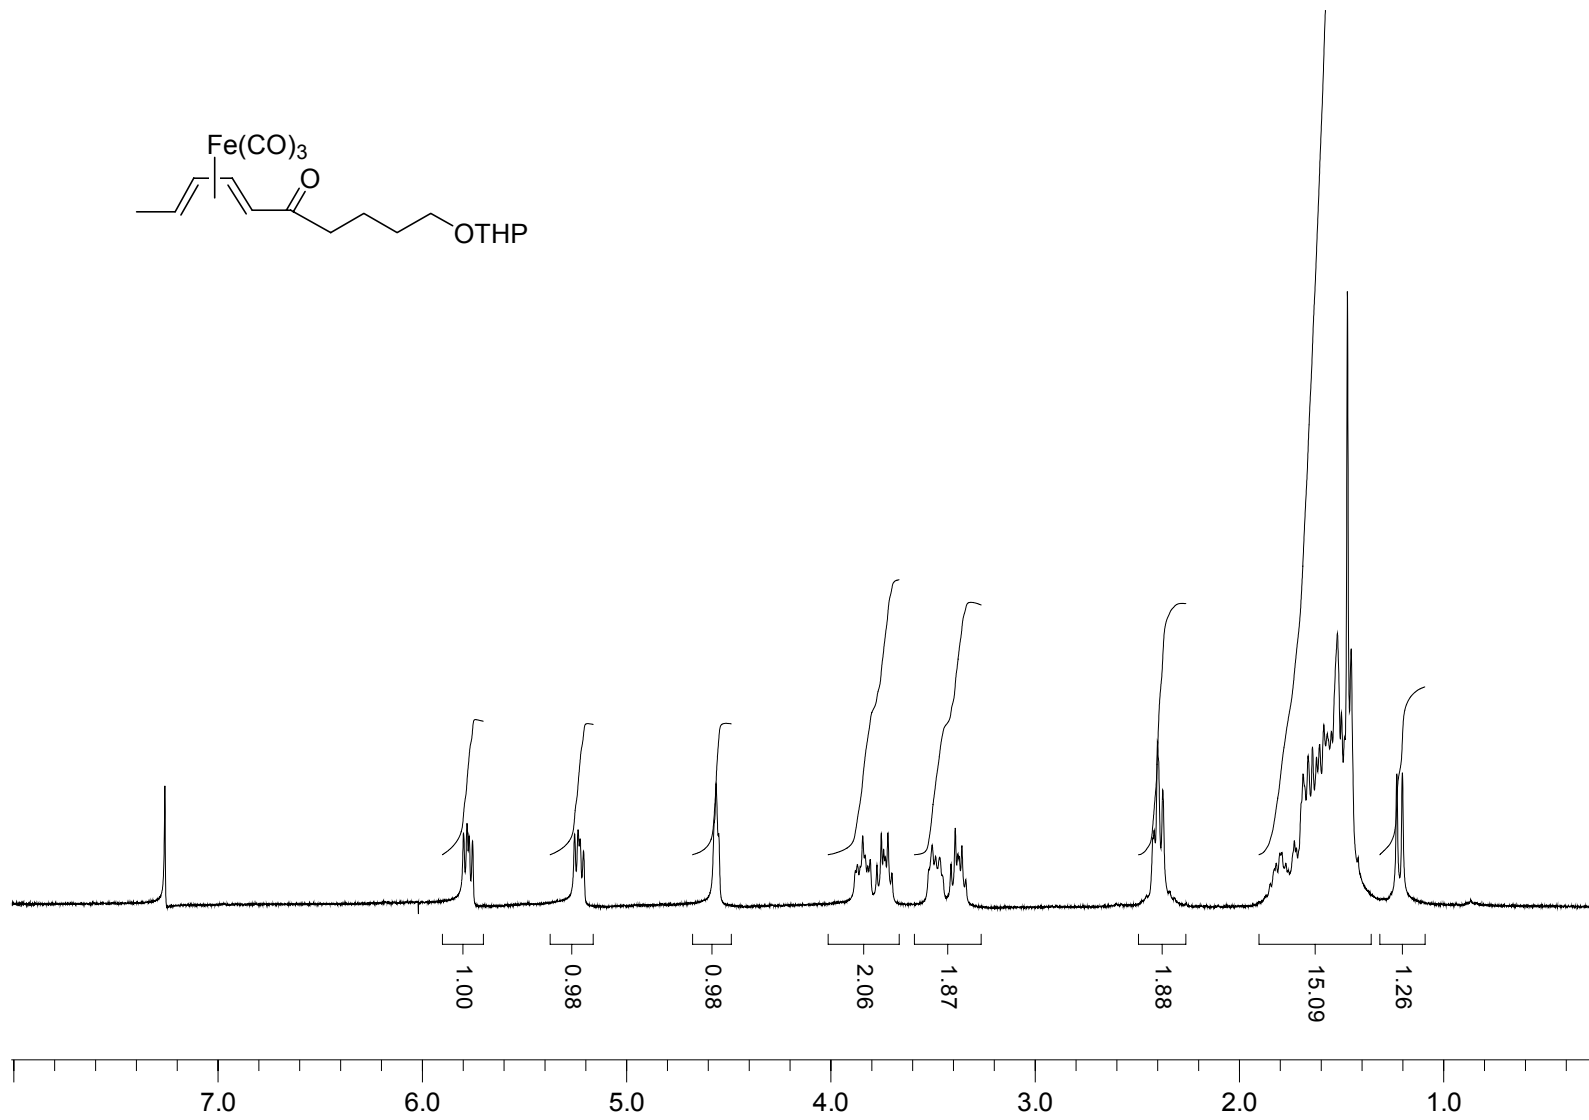



205.26

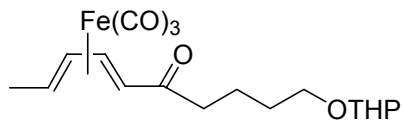

98.68

88.54

81.23

66.96

62.12

59.14

53.42

42.24

30.60

29.15

25.37

21.32

19.49

19.01

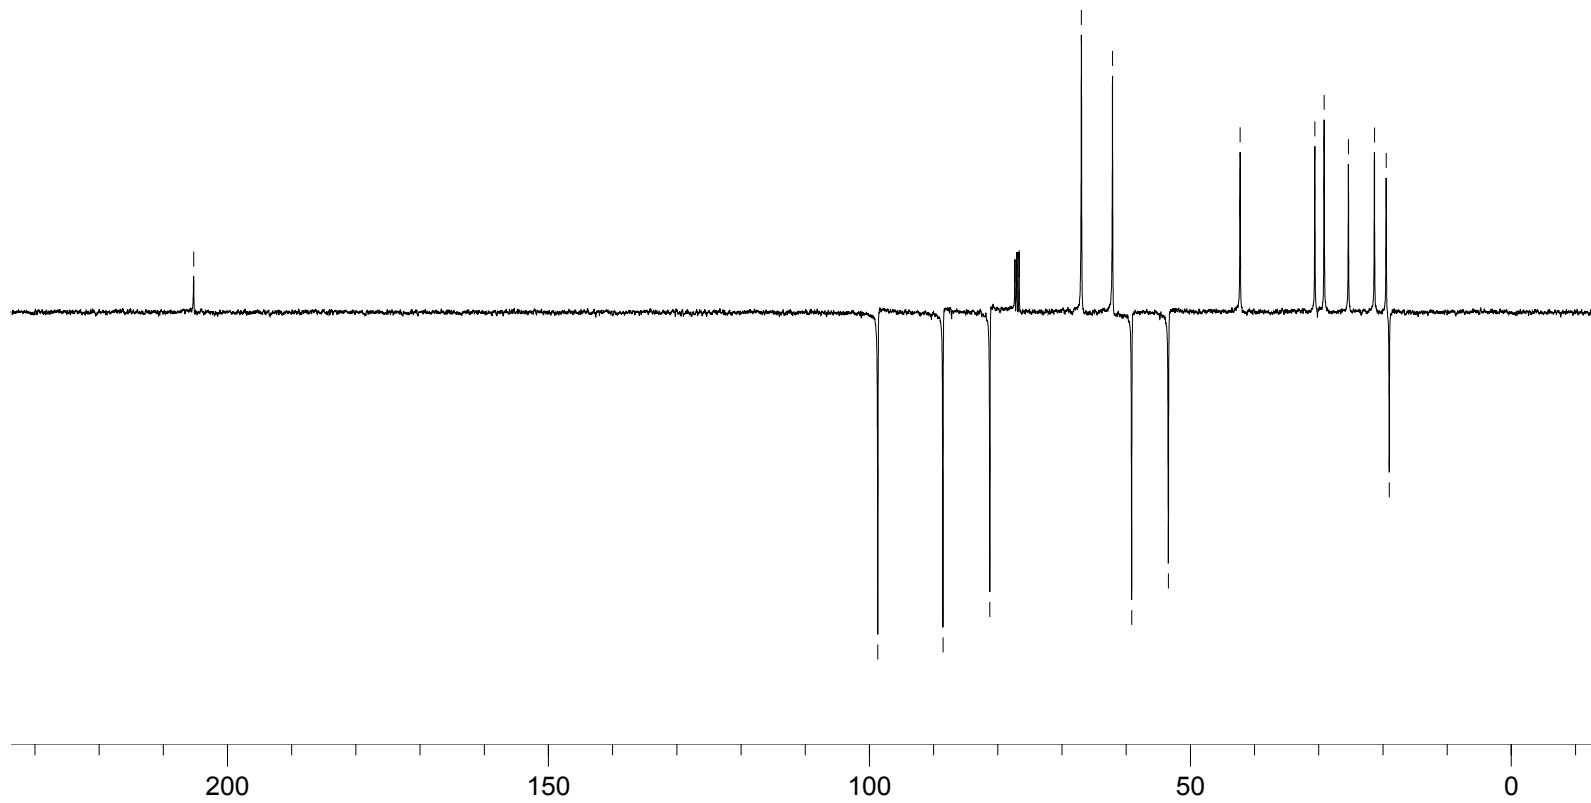

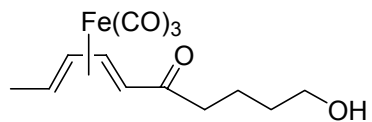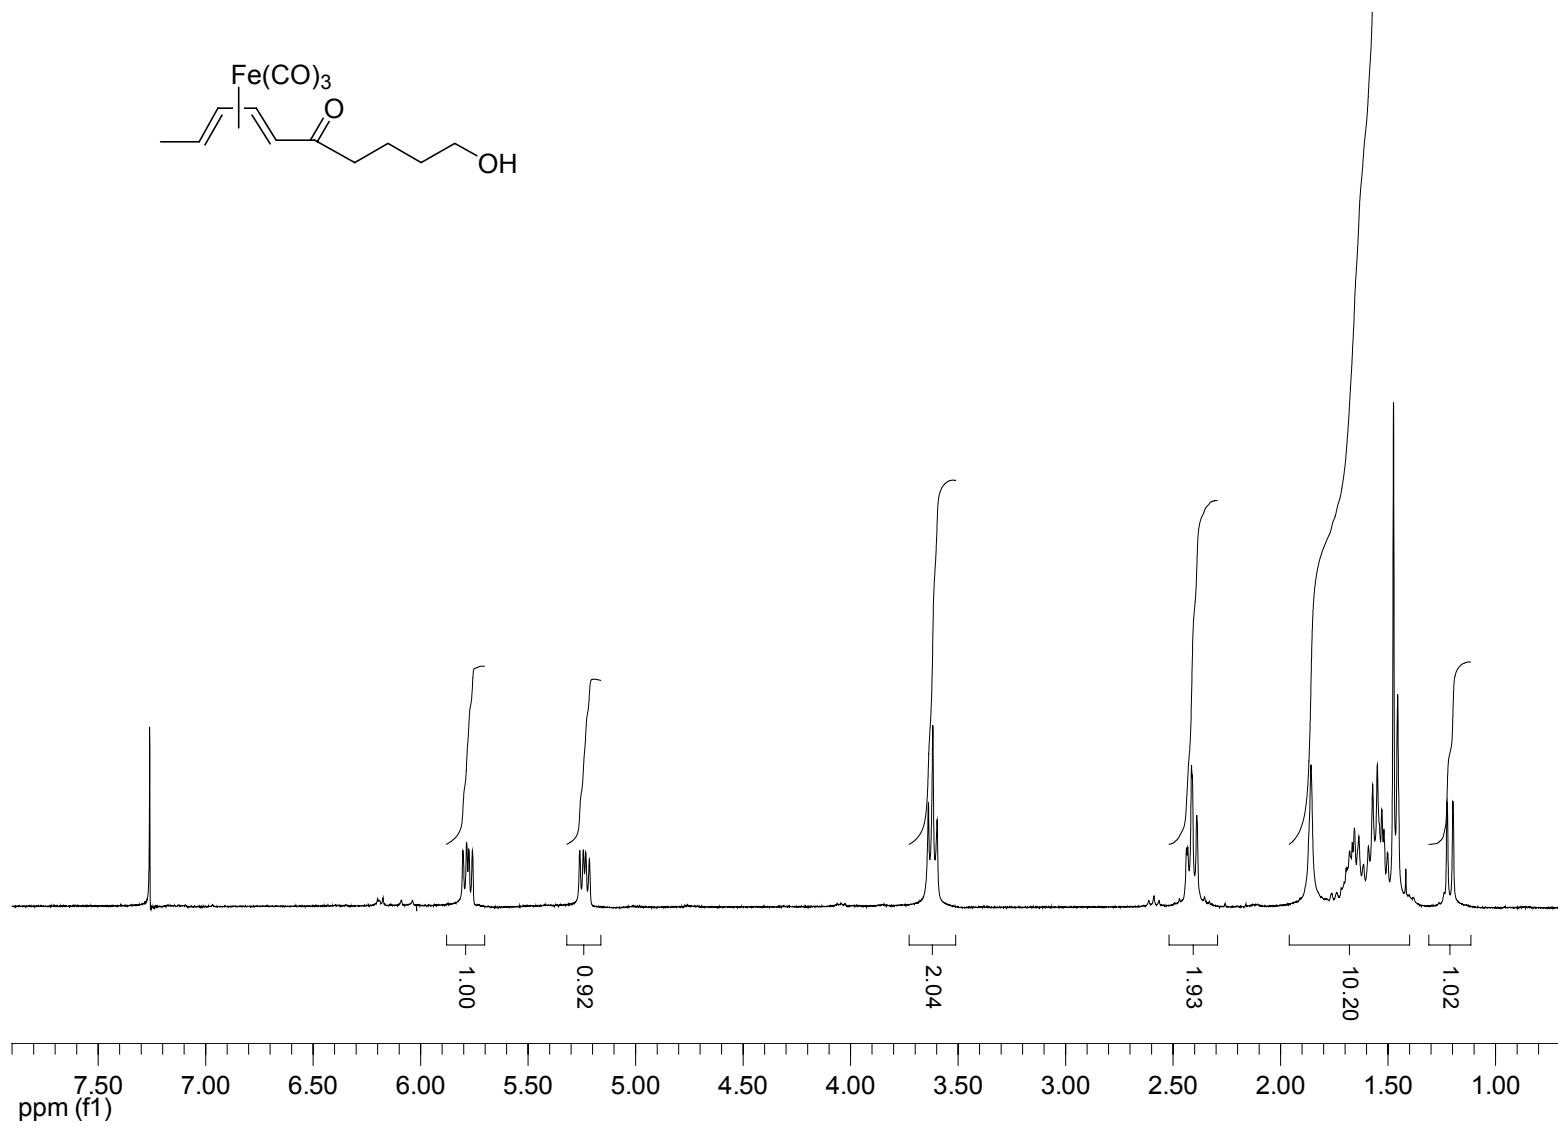

205,585

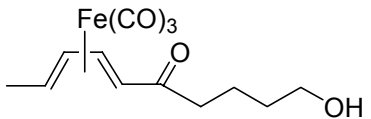

88,673

81,296

62,216

59,342

53,392

42,065

32,157

20,394

19,122

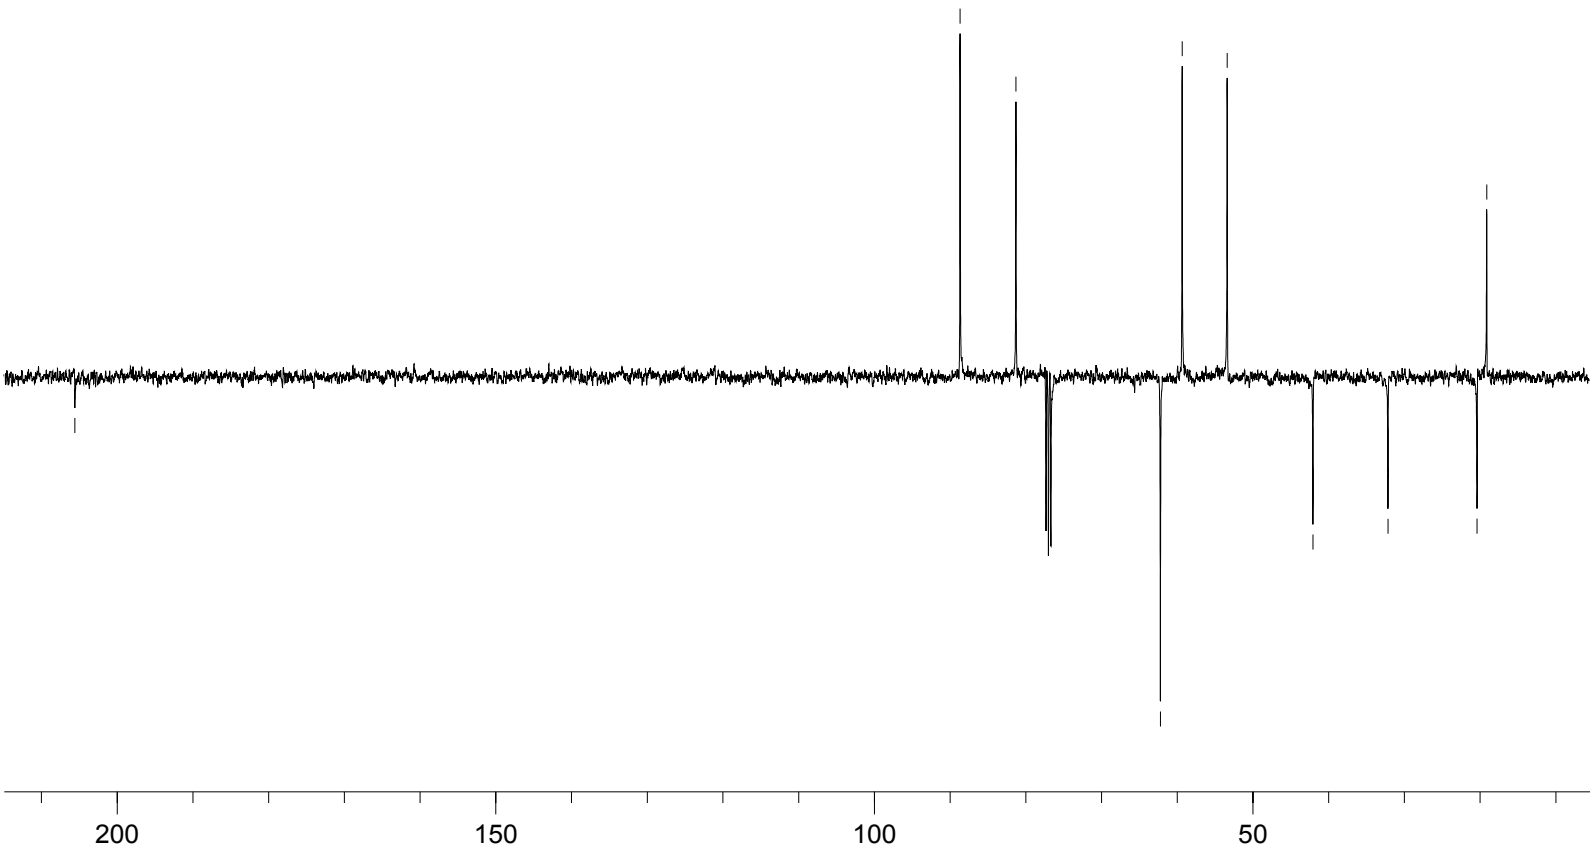

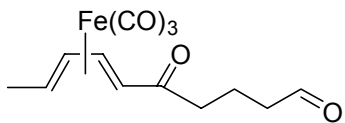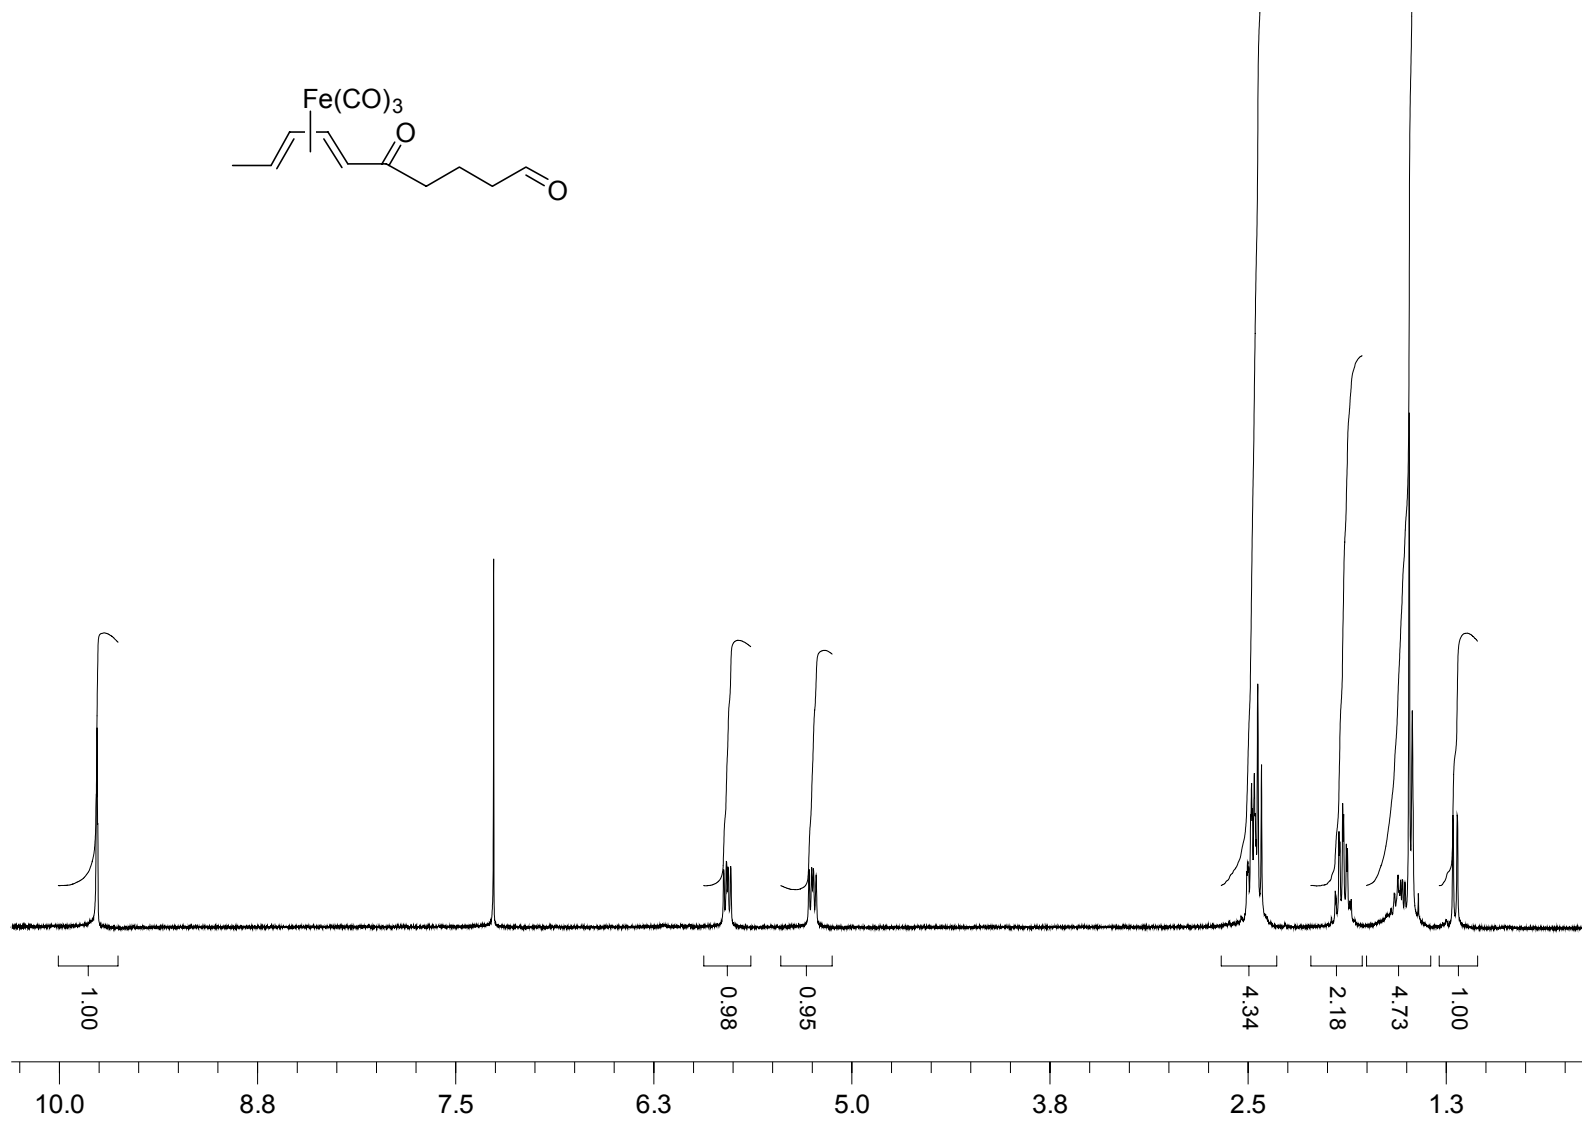

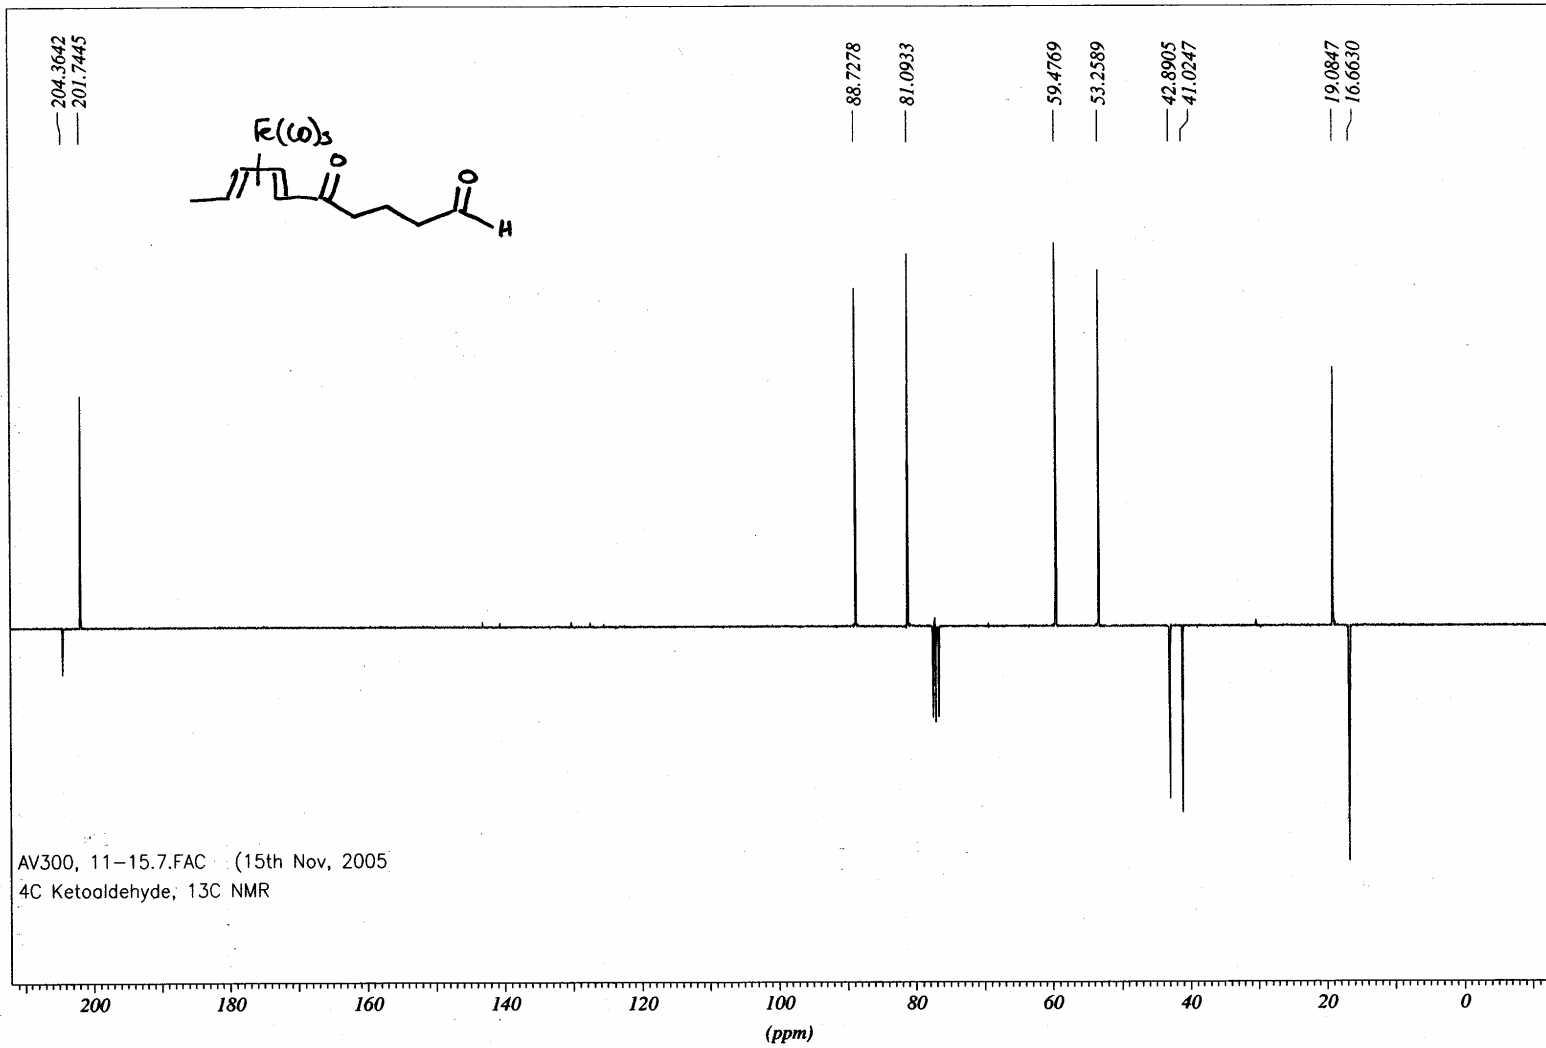

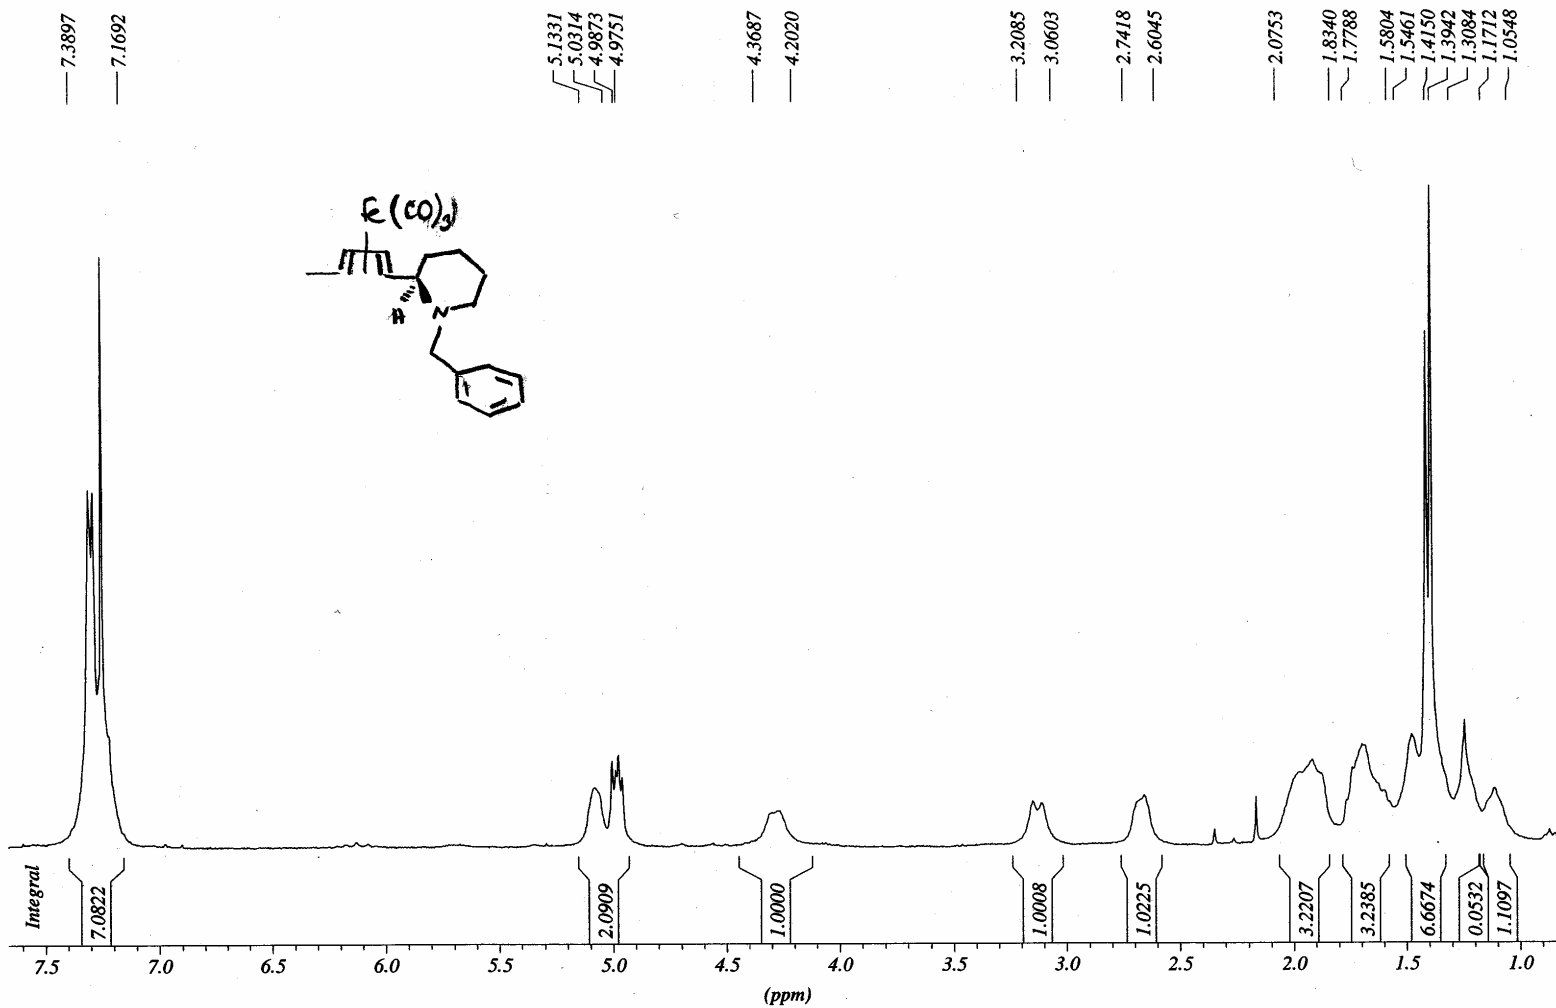

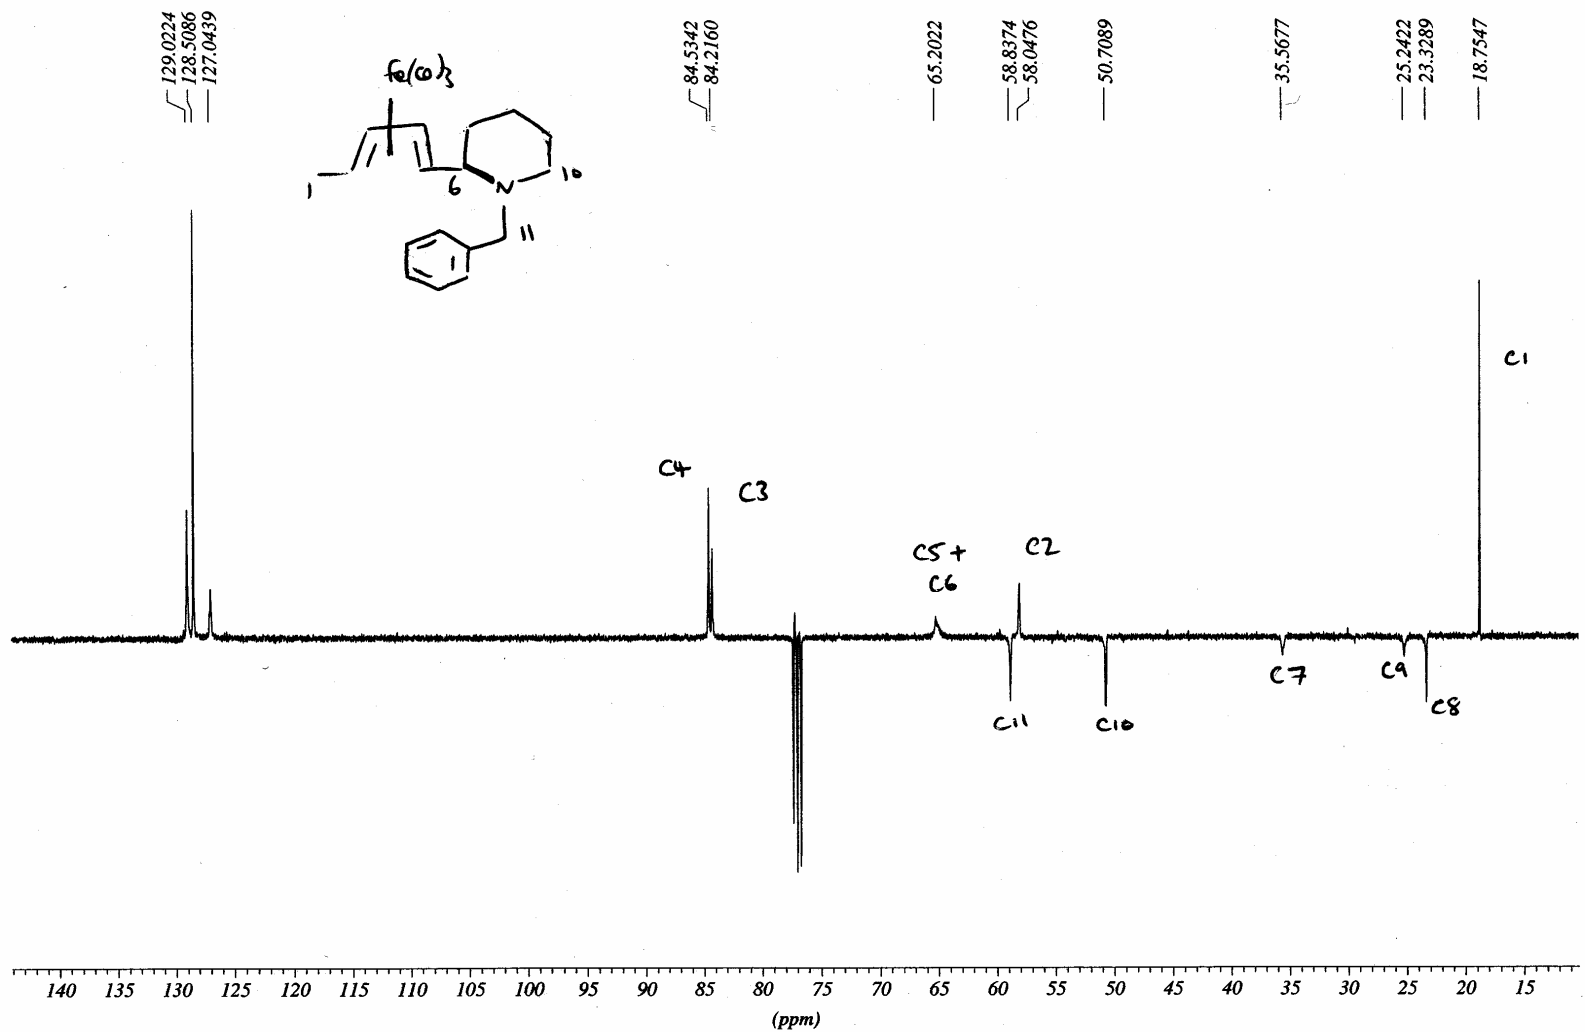

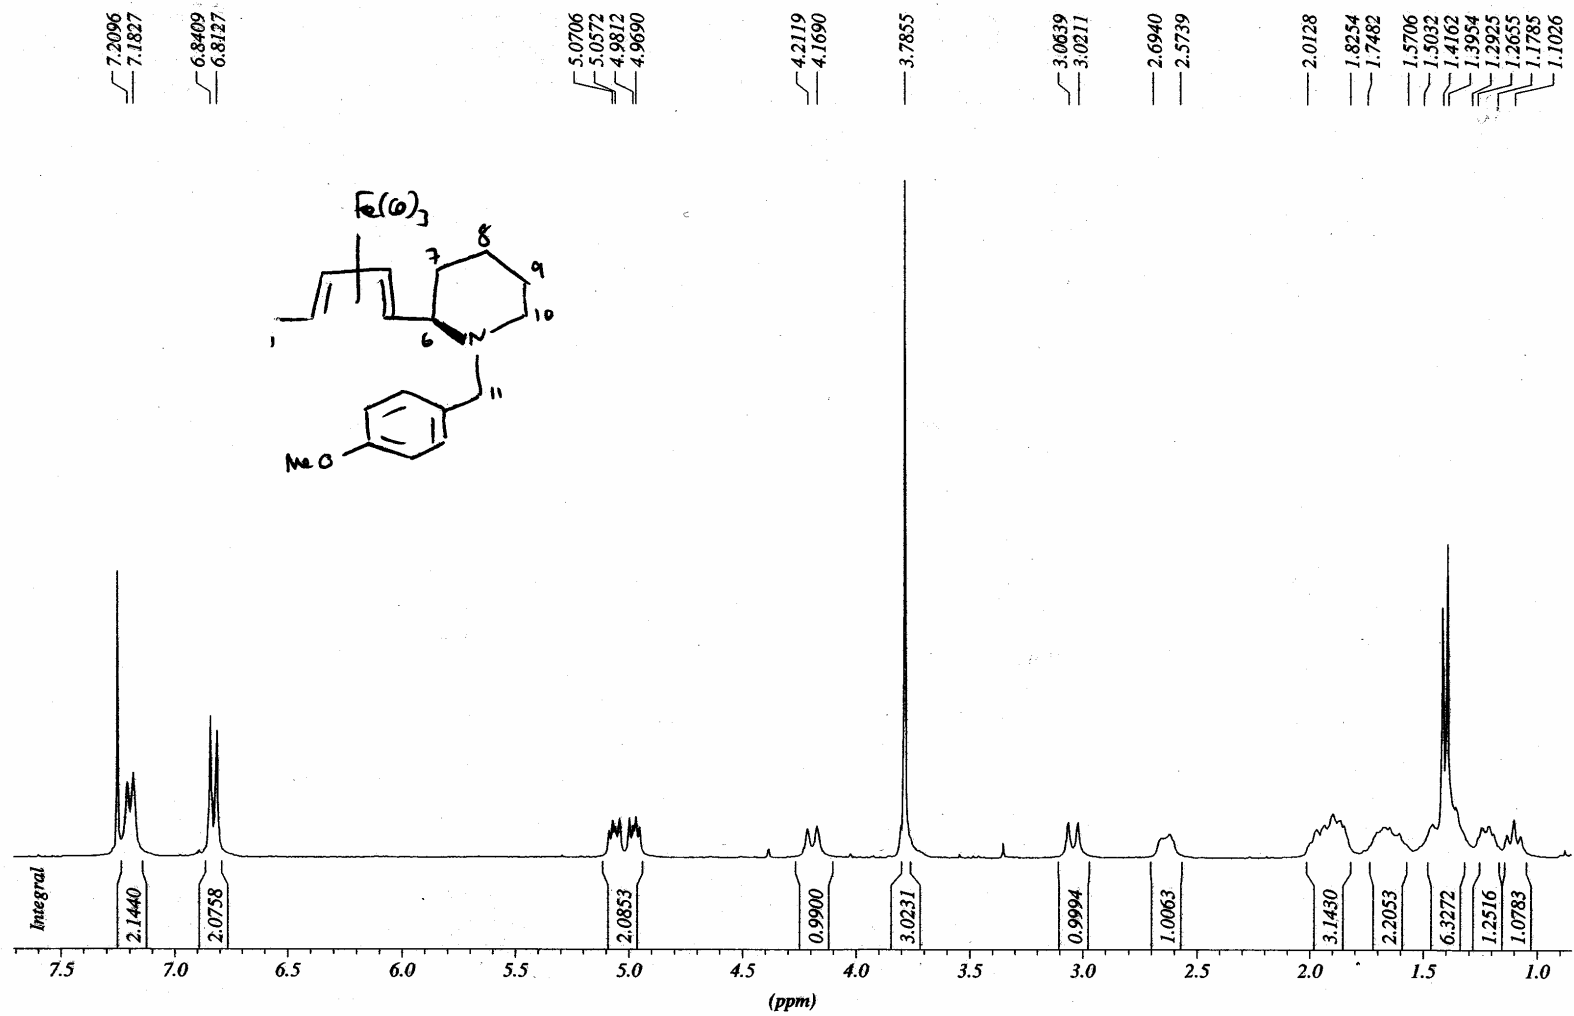



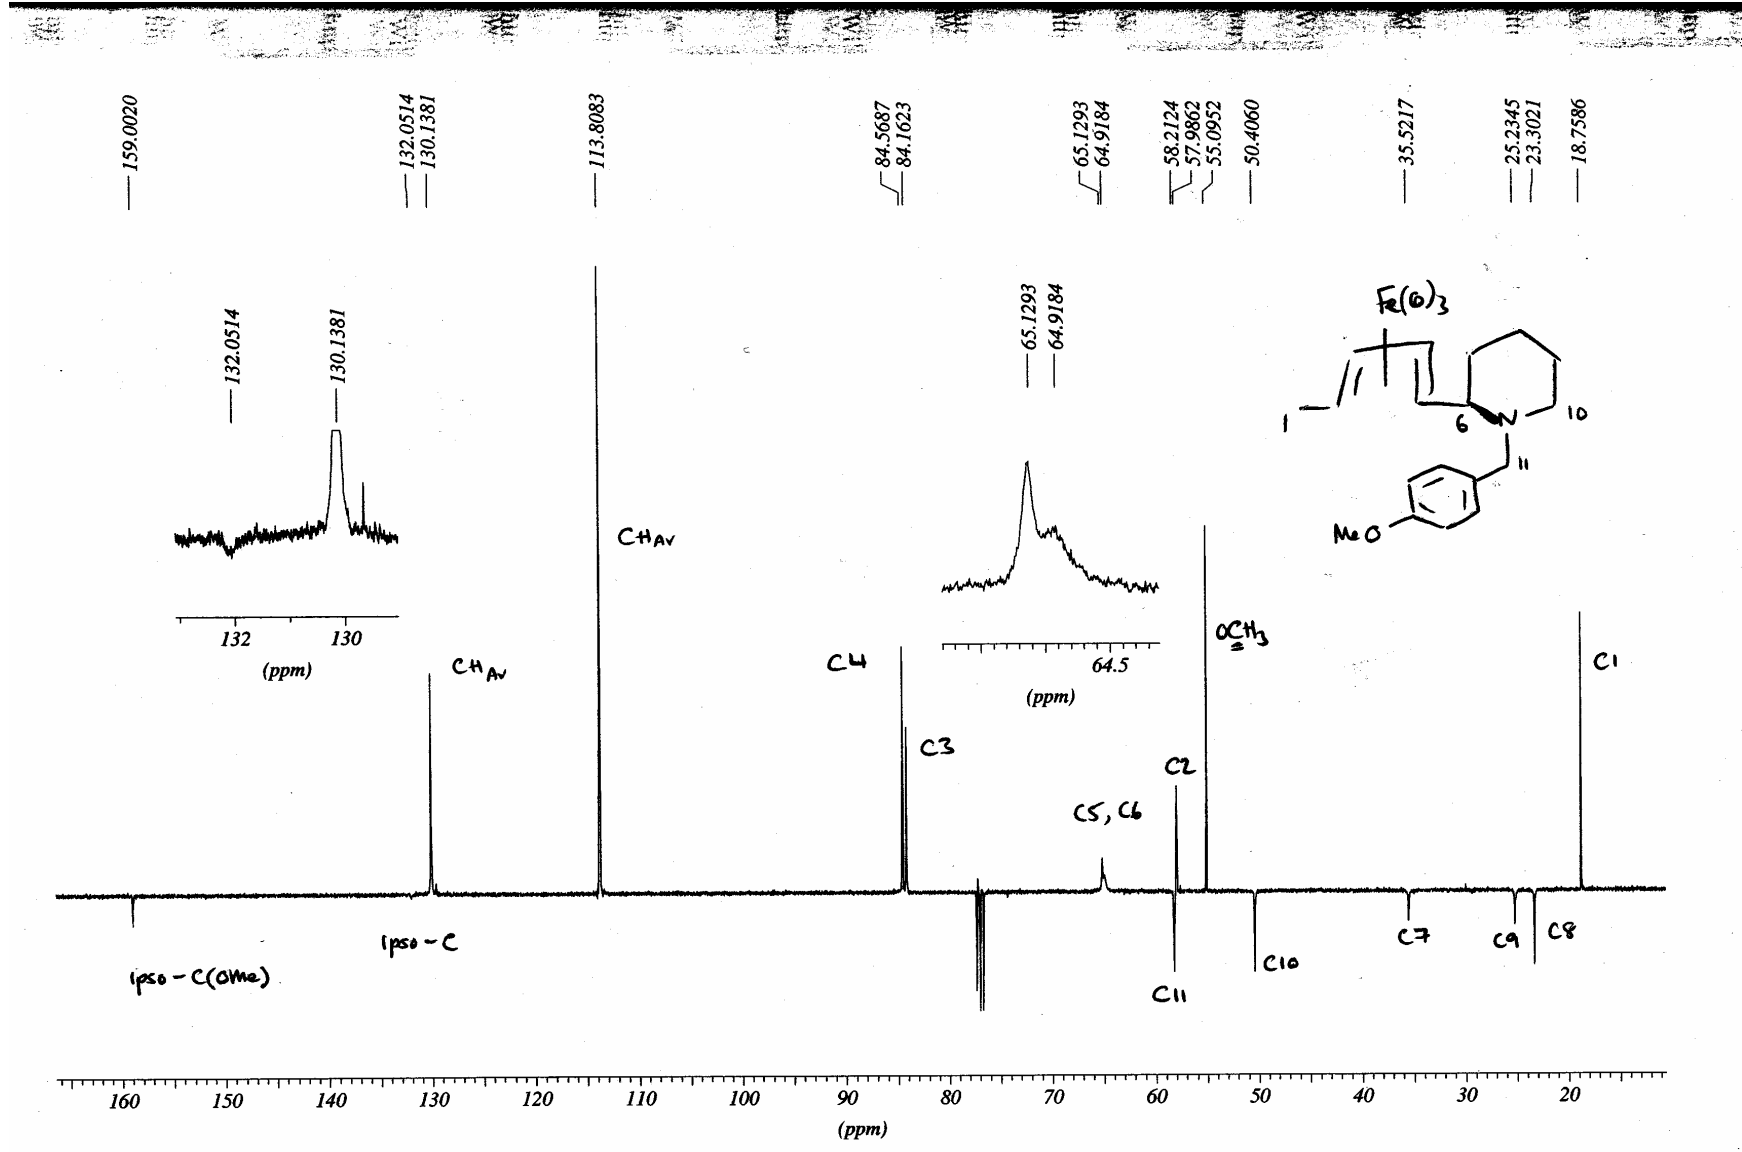

5.0486  
5.0351  
4.9690  
4.9567

2.9280  
2.7626

2.3460  
2.2186  
2.1268  
2.0006  
1.9393

1.7752  
1.7543  
1.6465  
1.6281

1.4027  
1.3819

1.1393  
1.0193  
0.9678  
0.8318

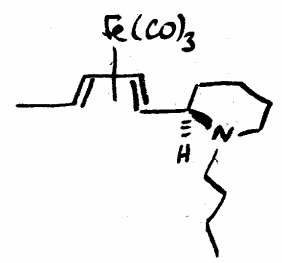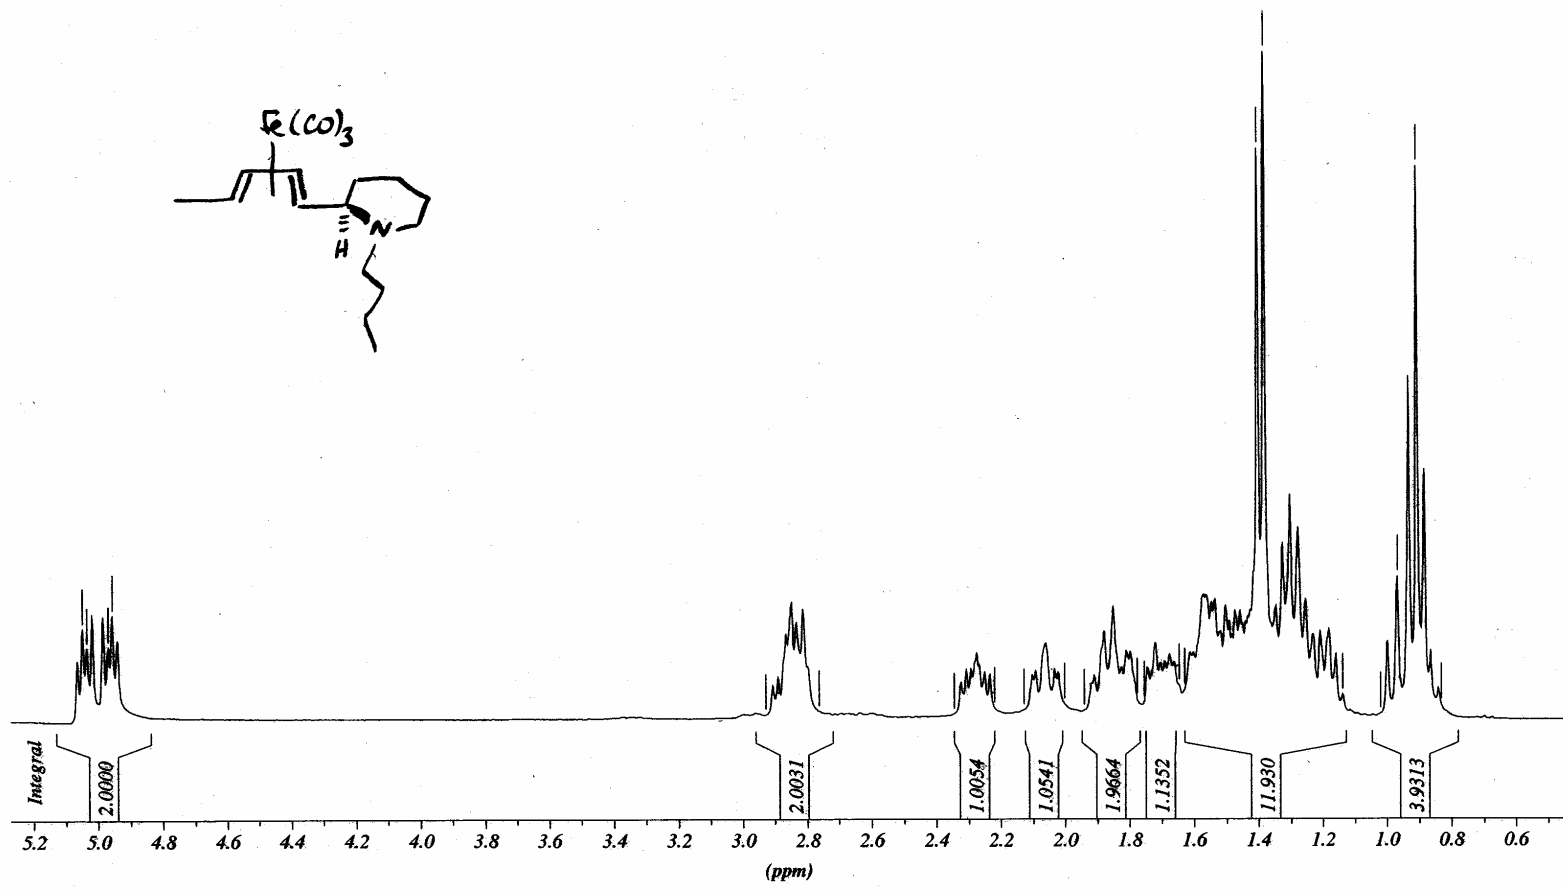

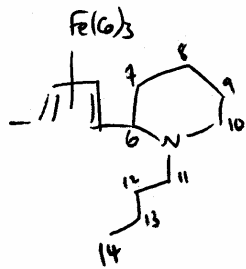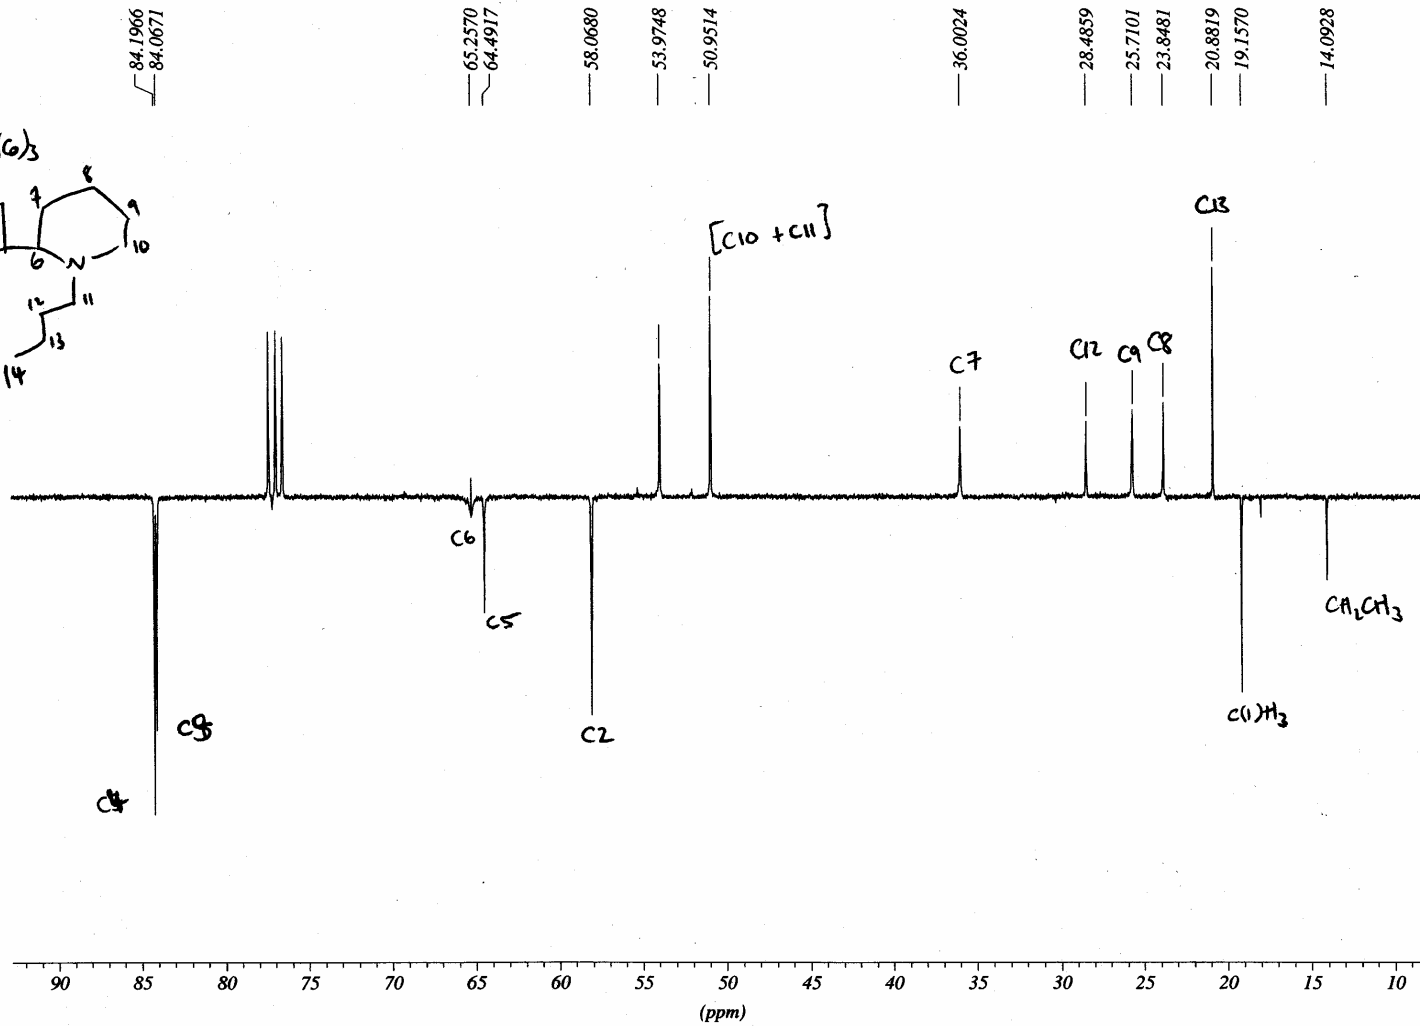

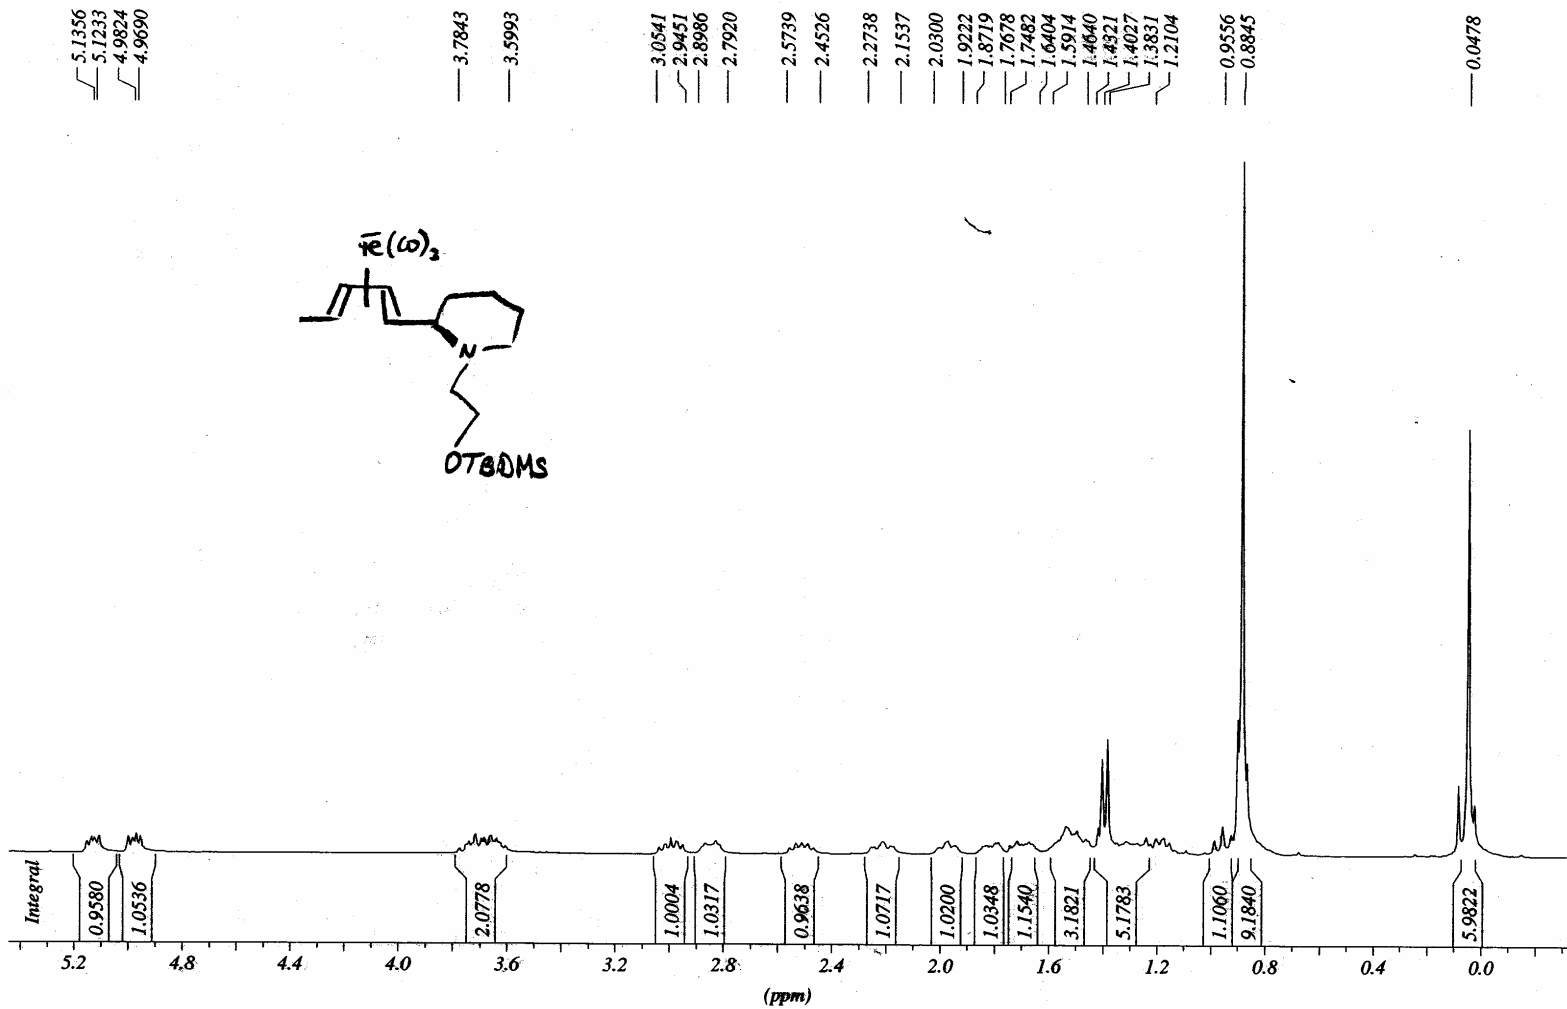

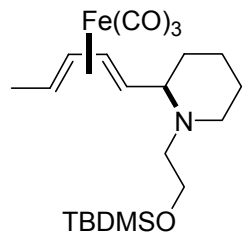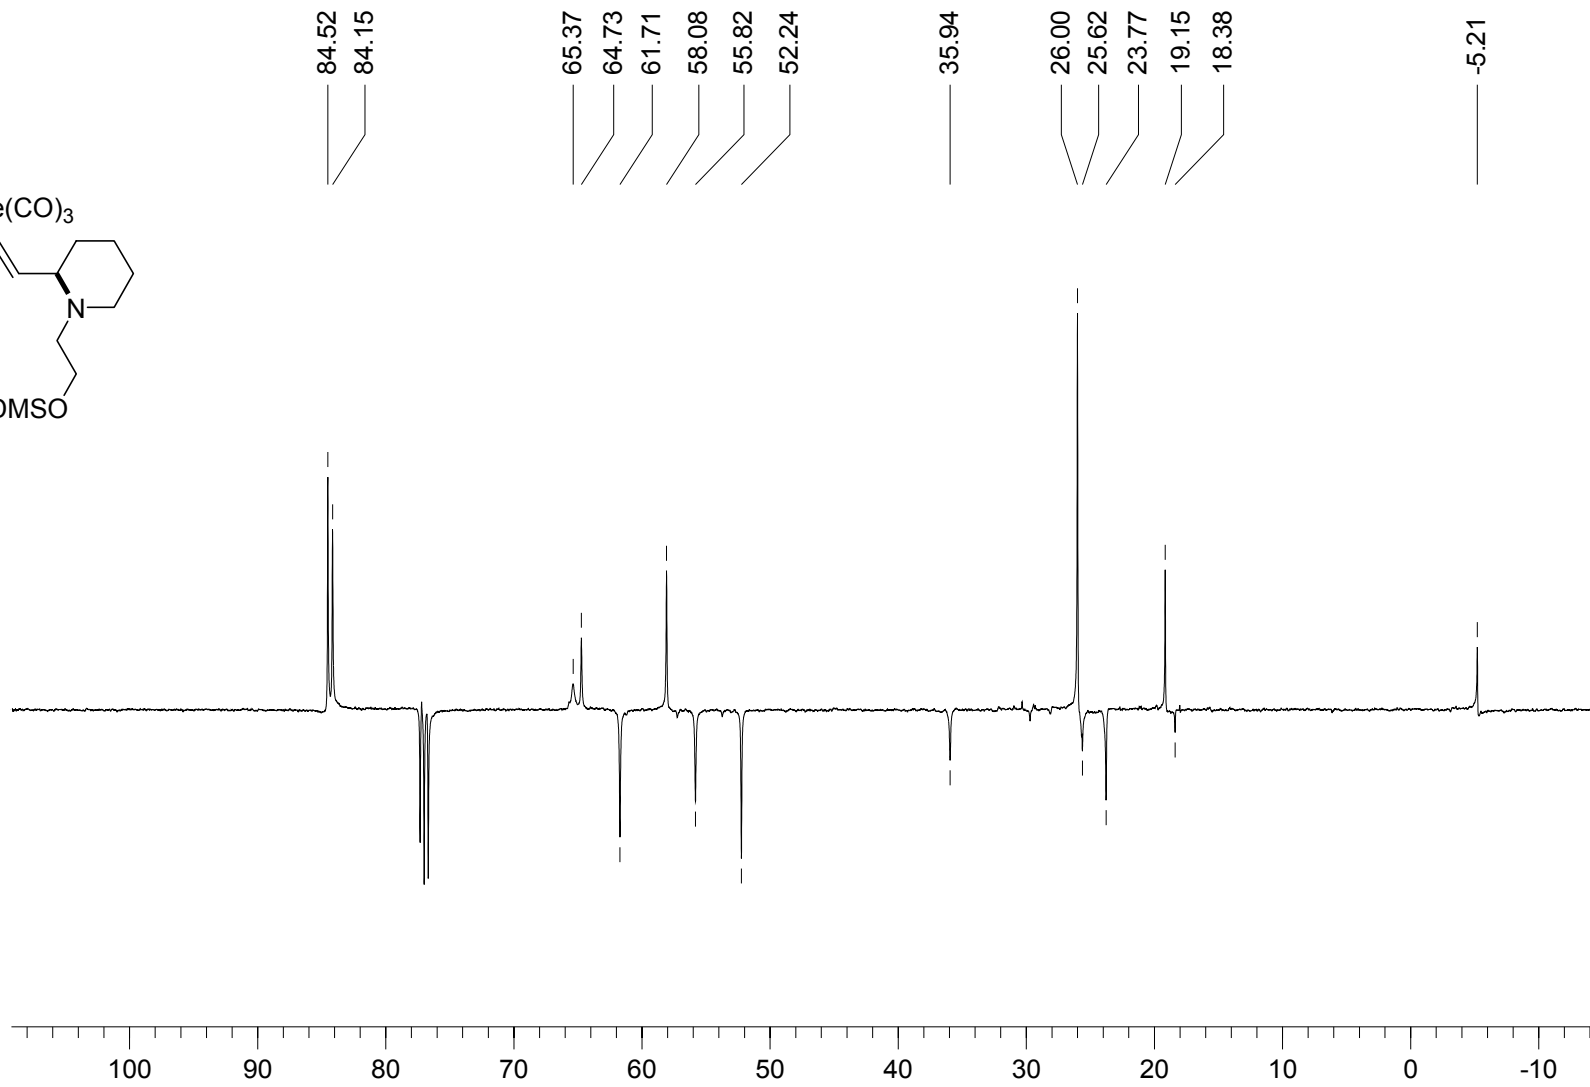

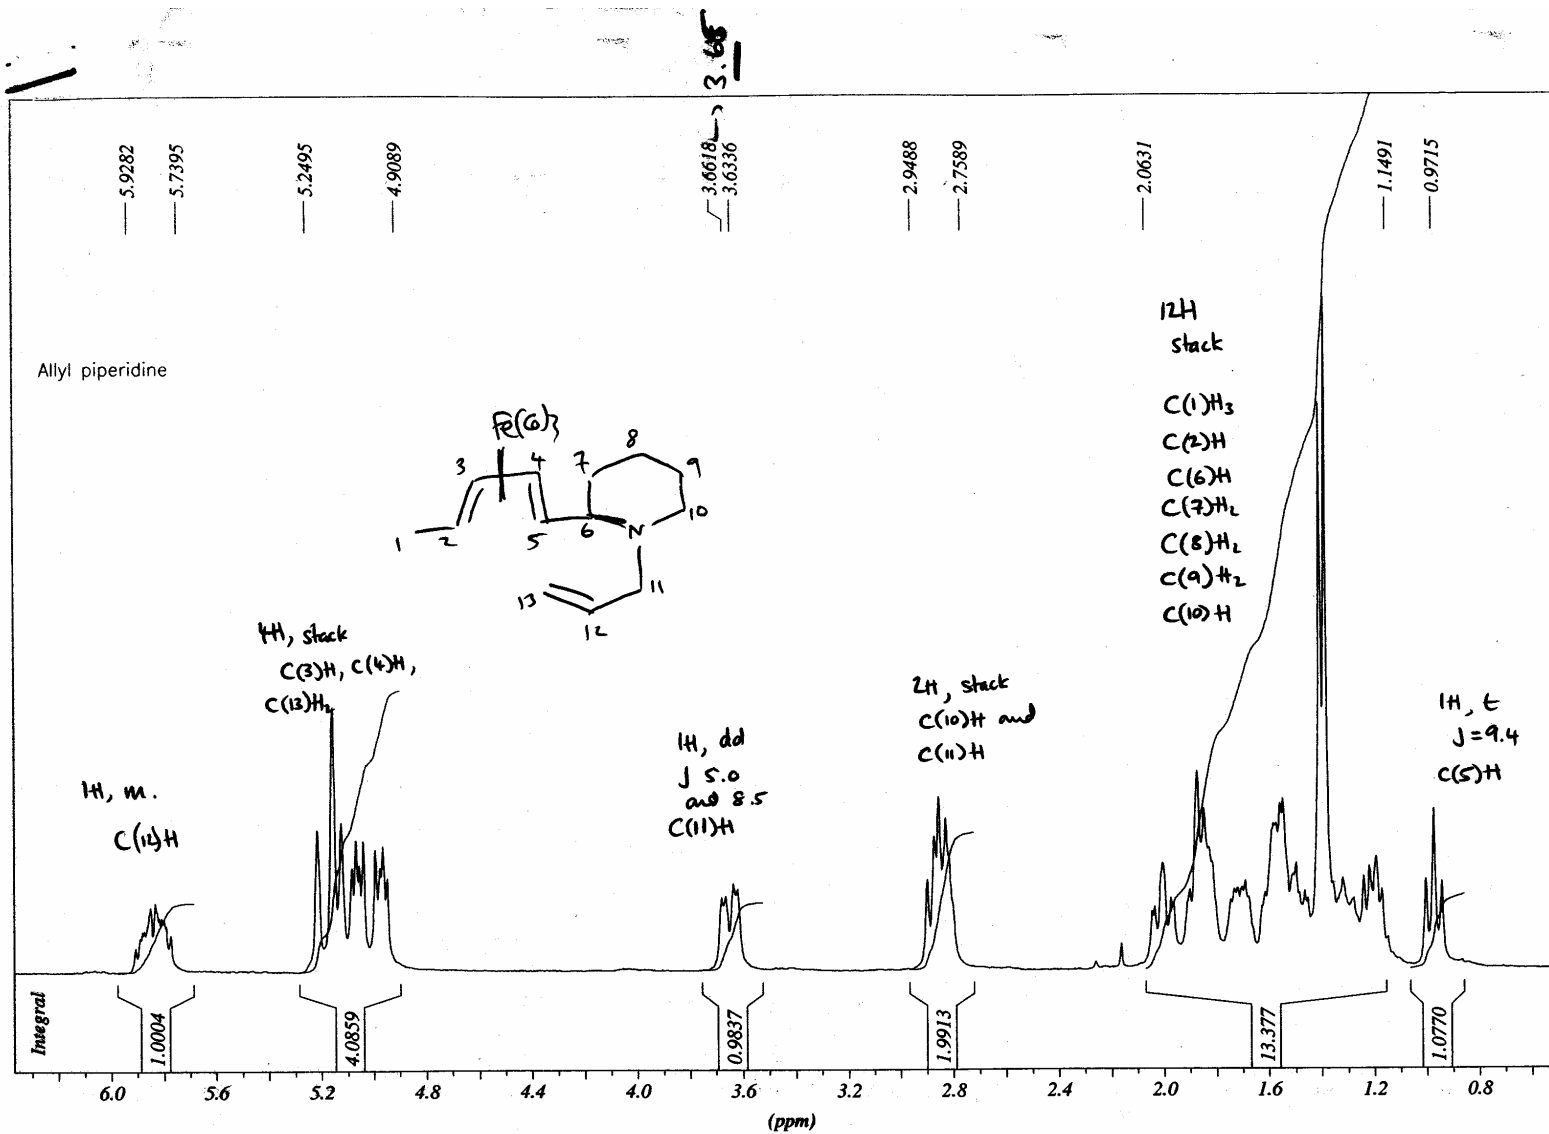

21/11/05, posn 6.  
Allyl piperidine

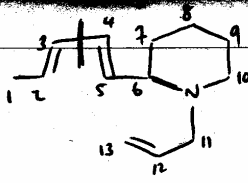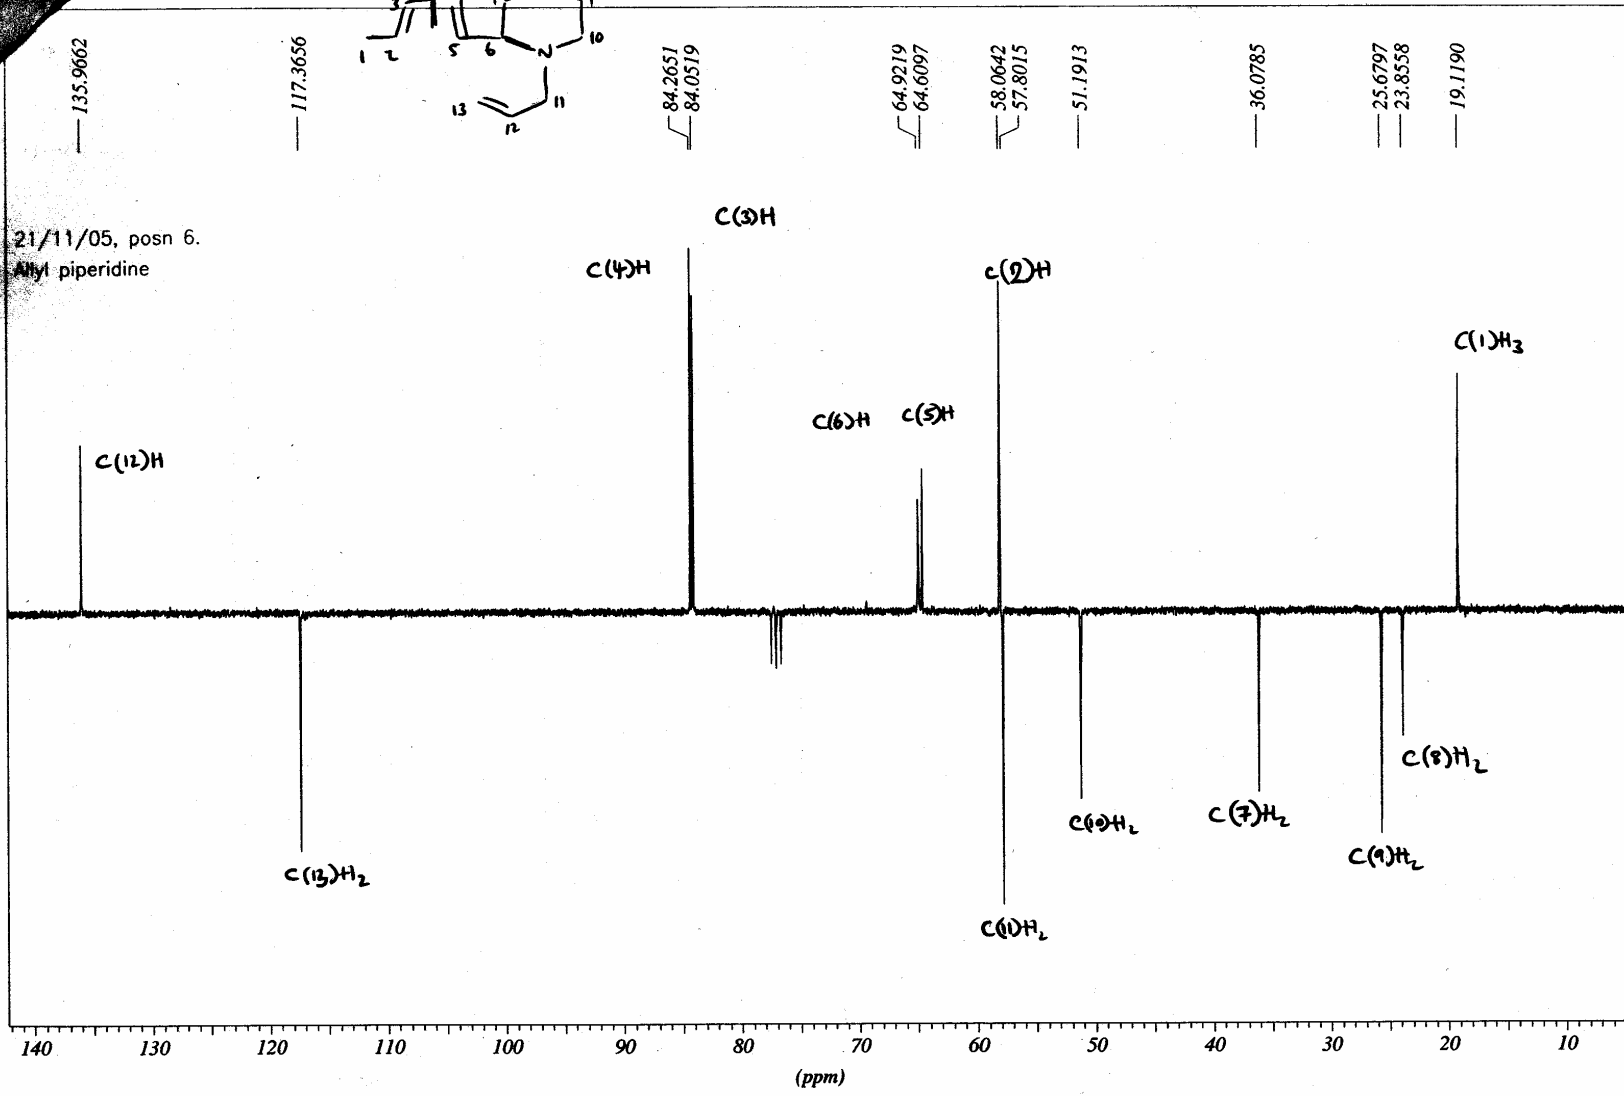

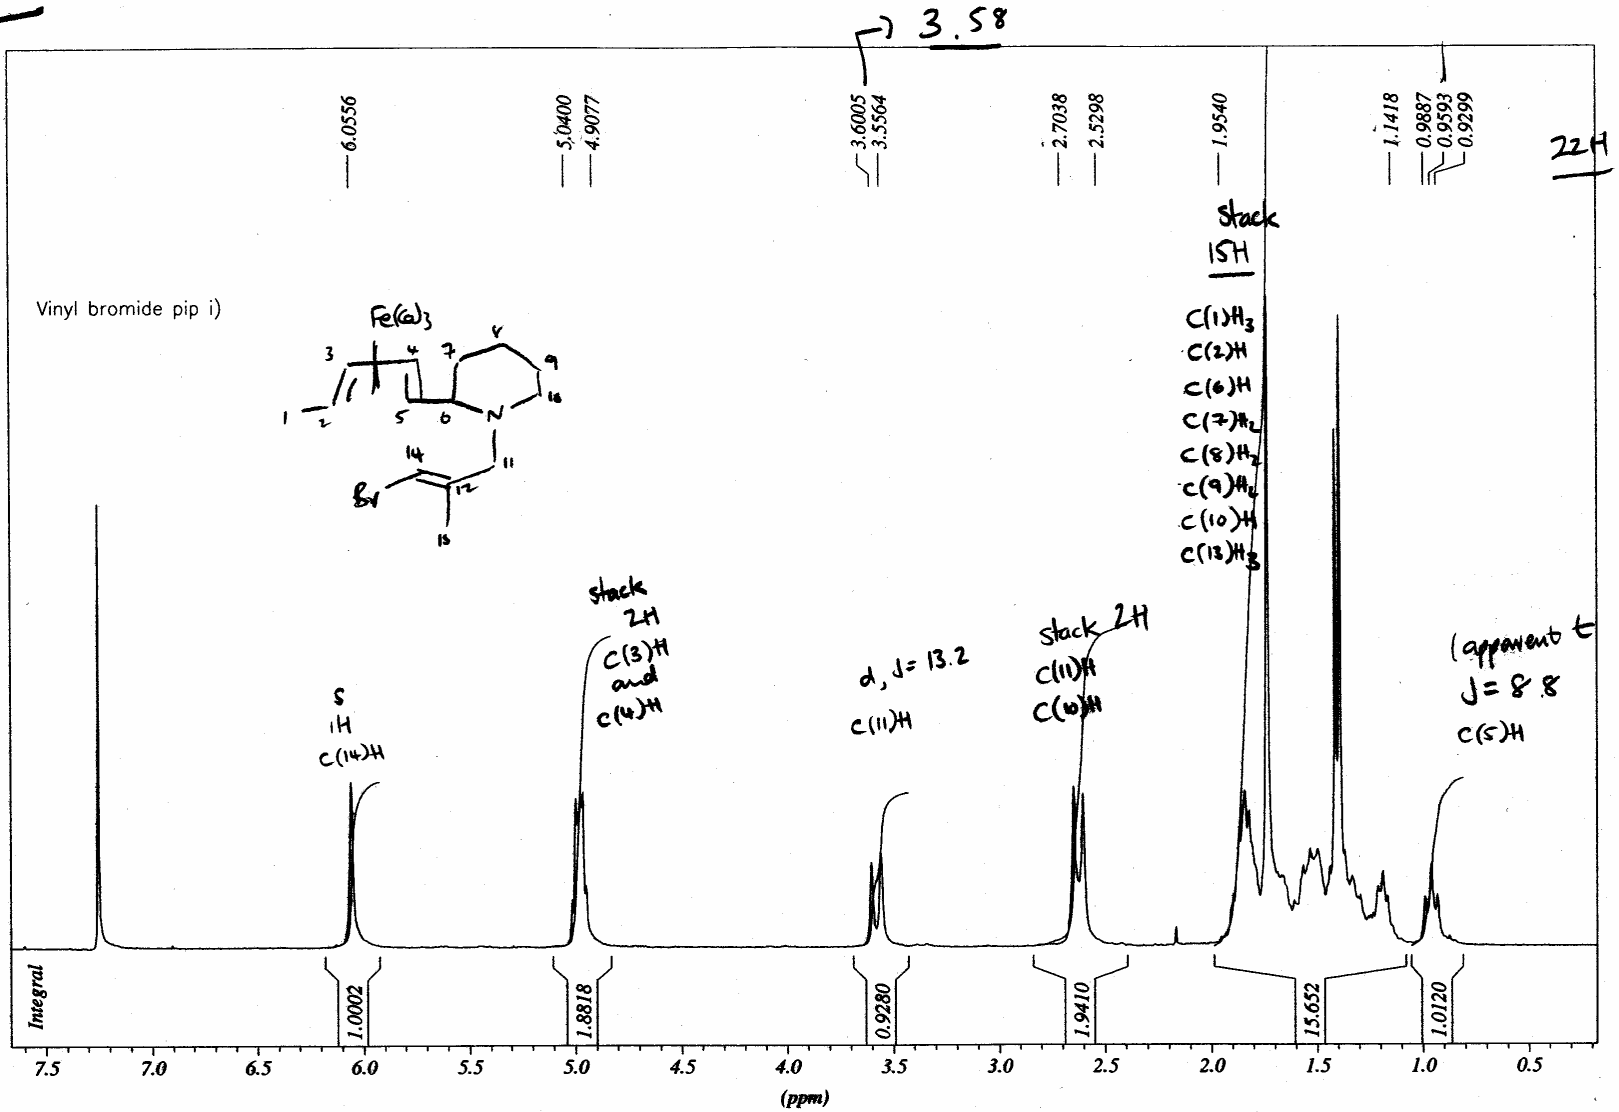



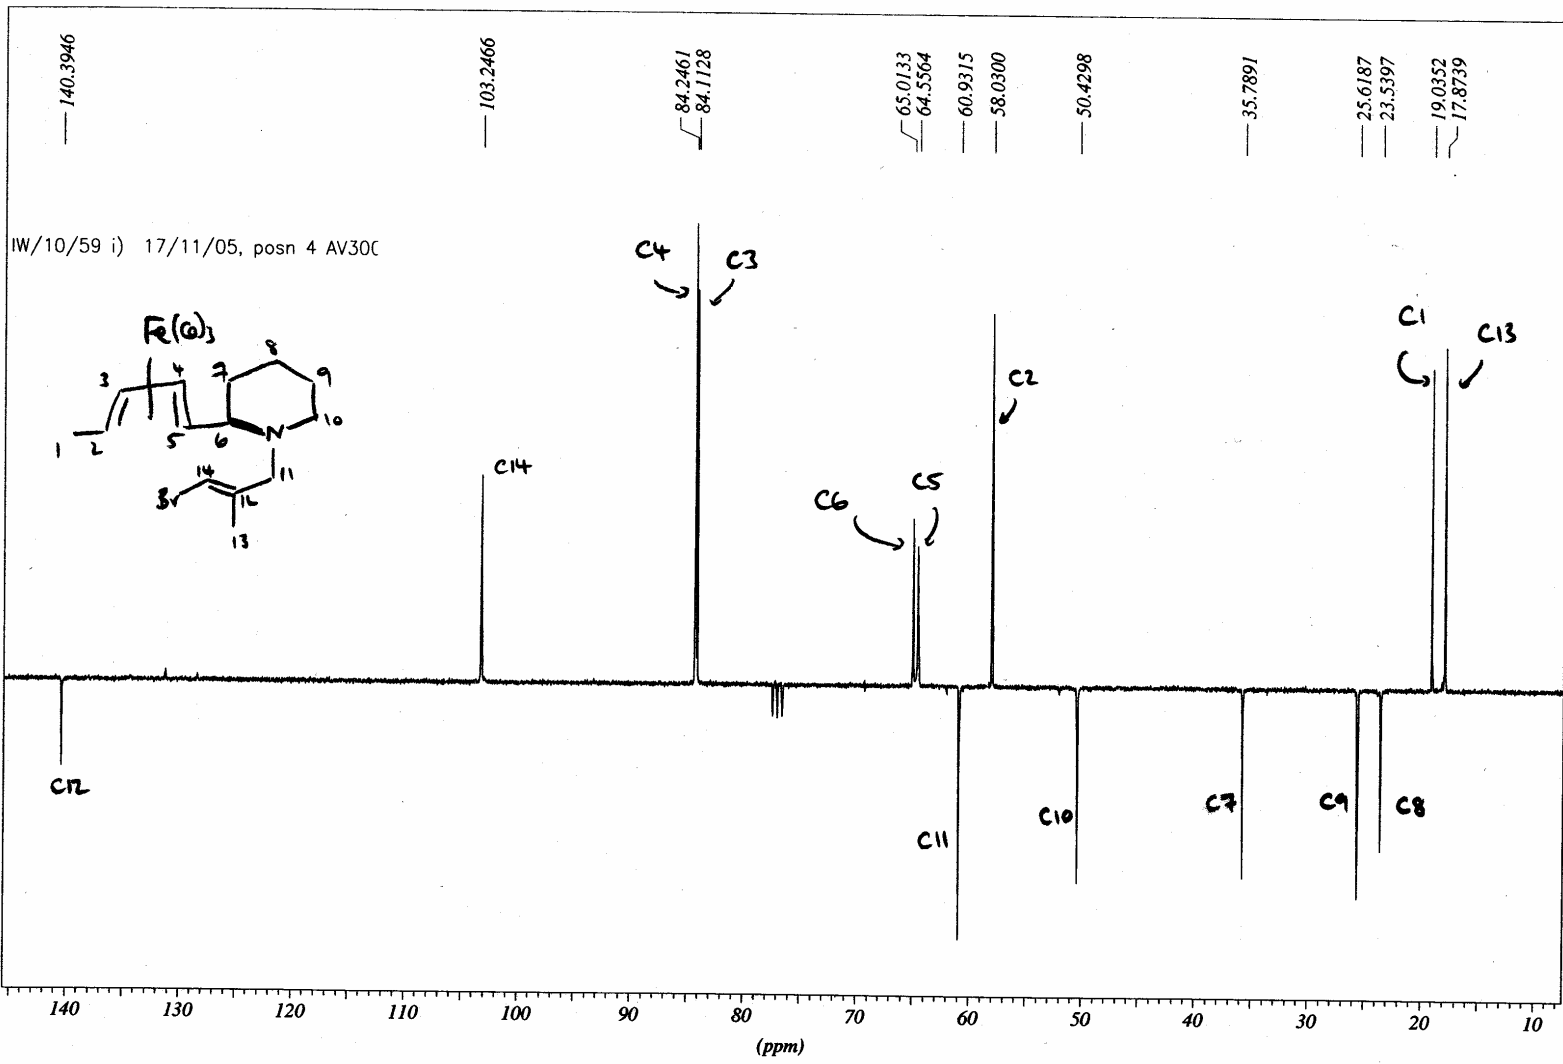

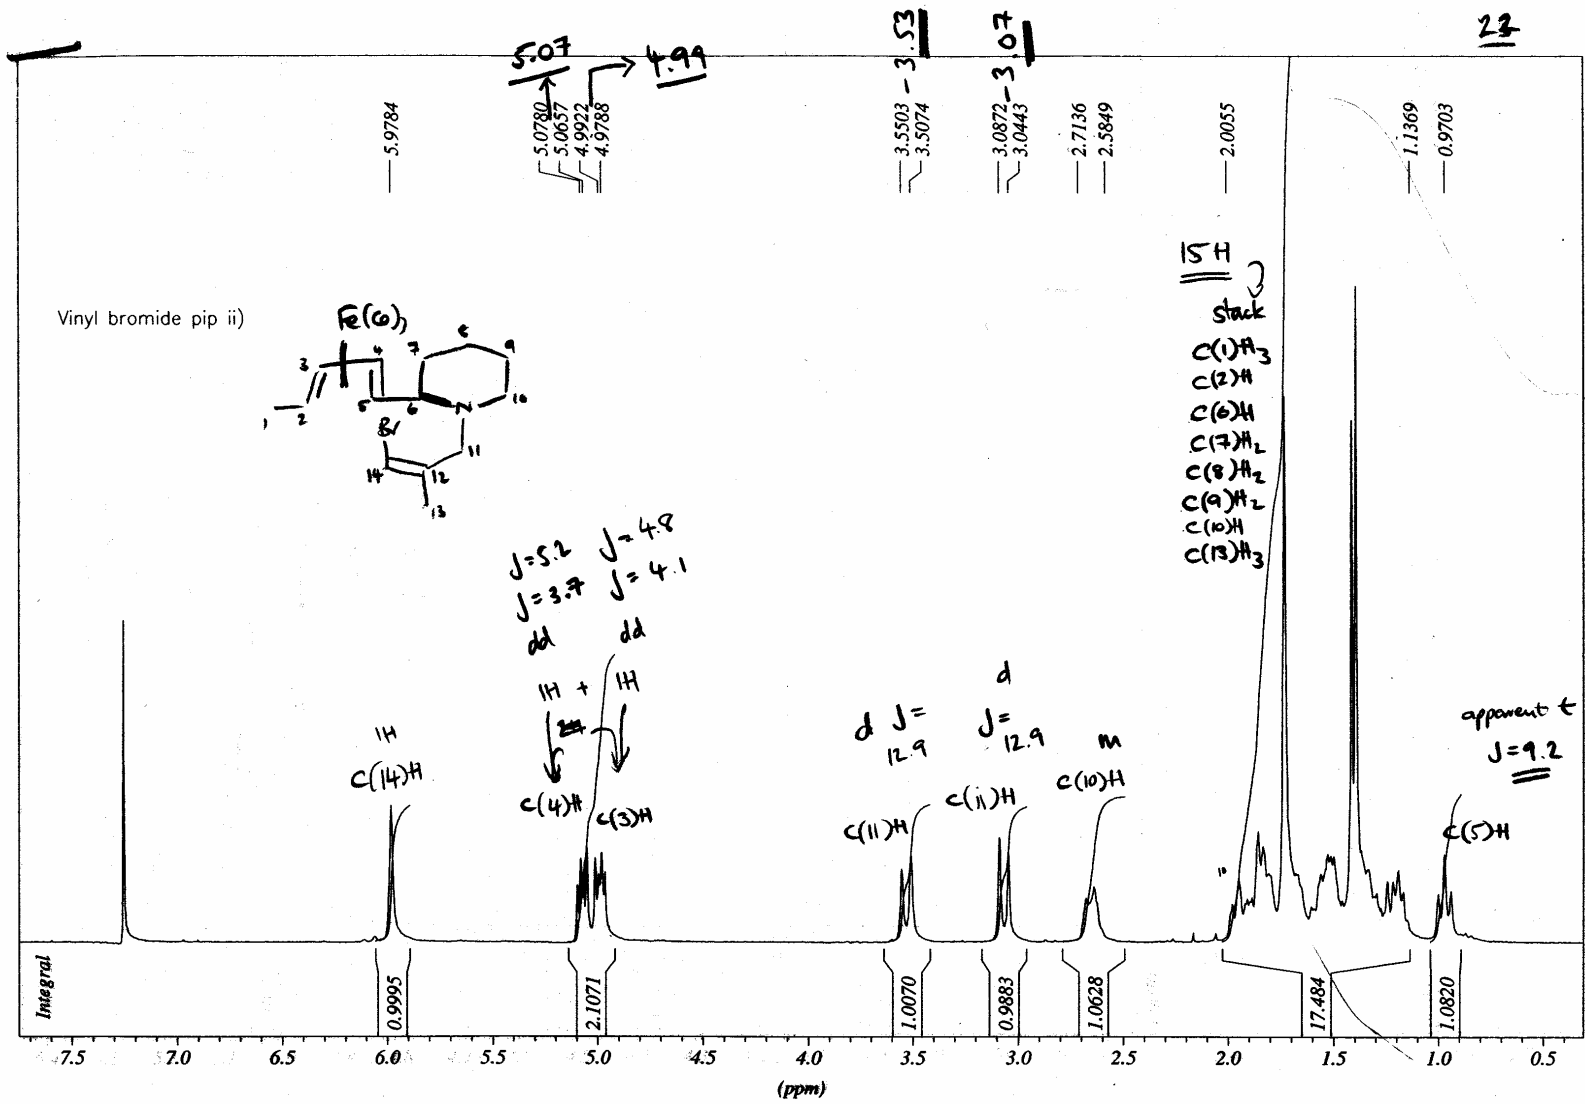

FROM 2D NMR WORK

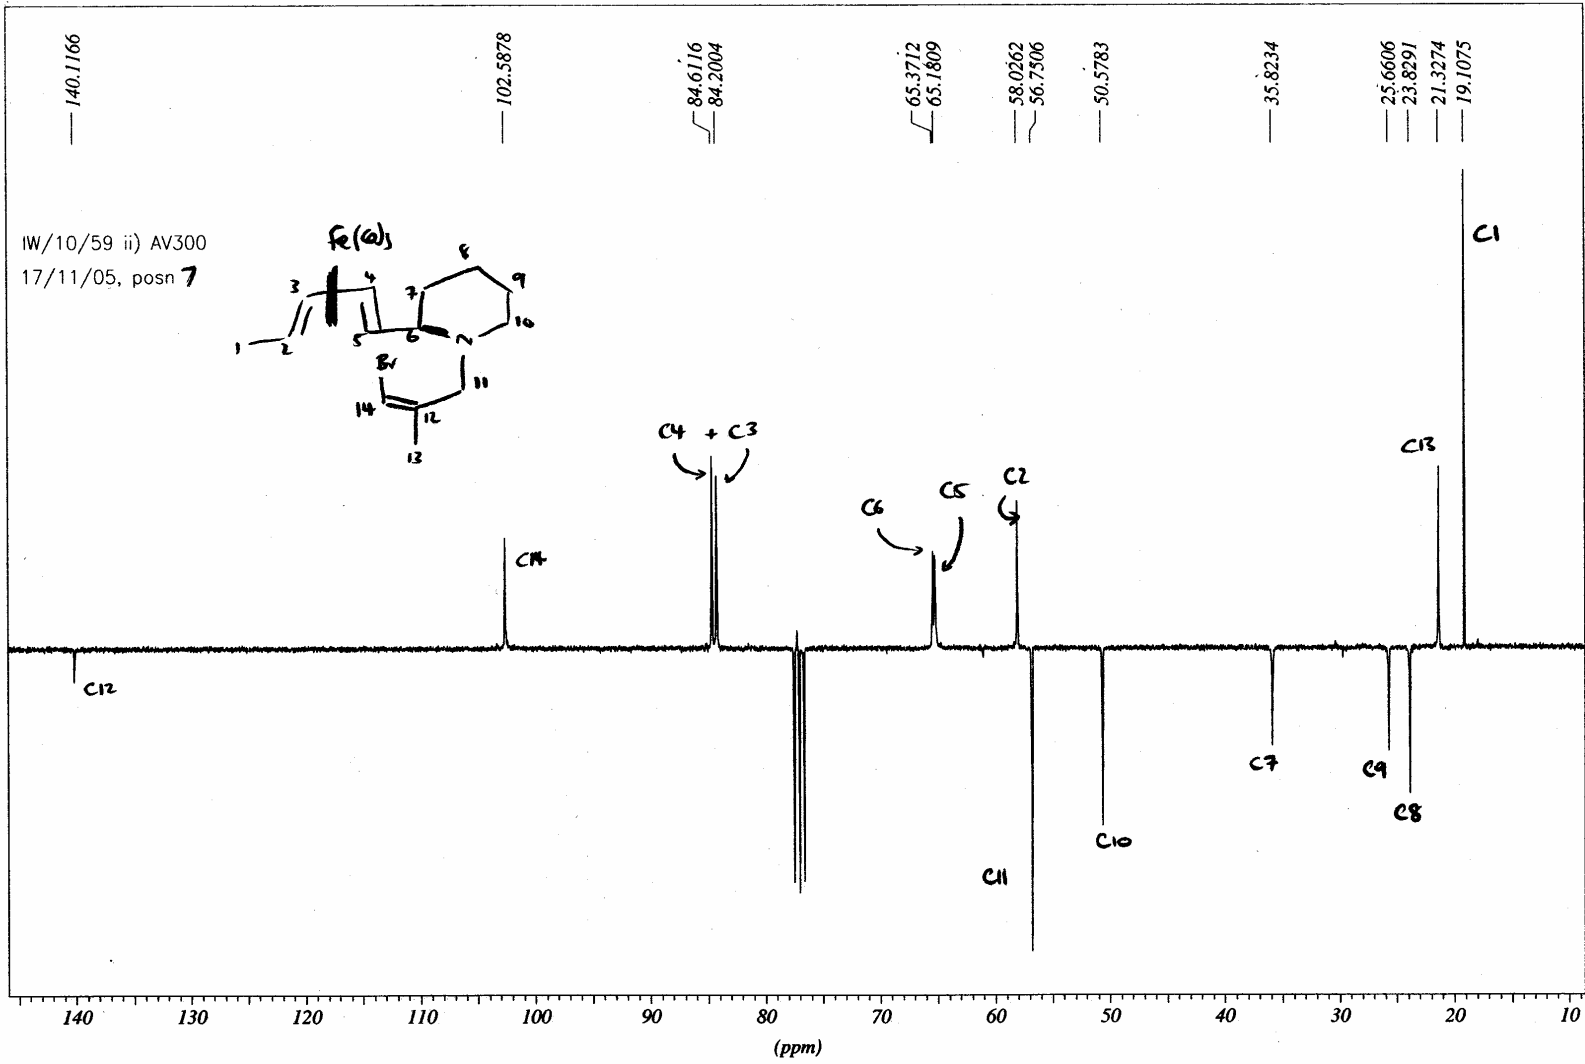

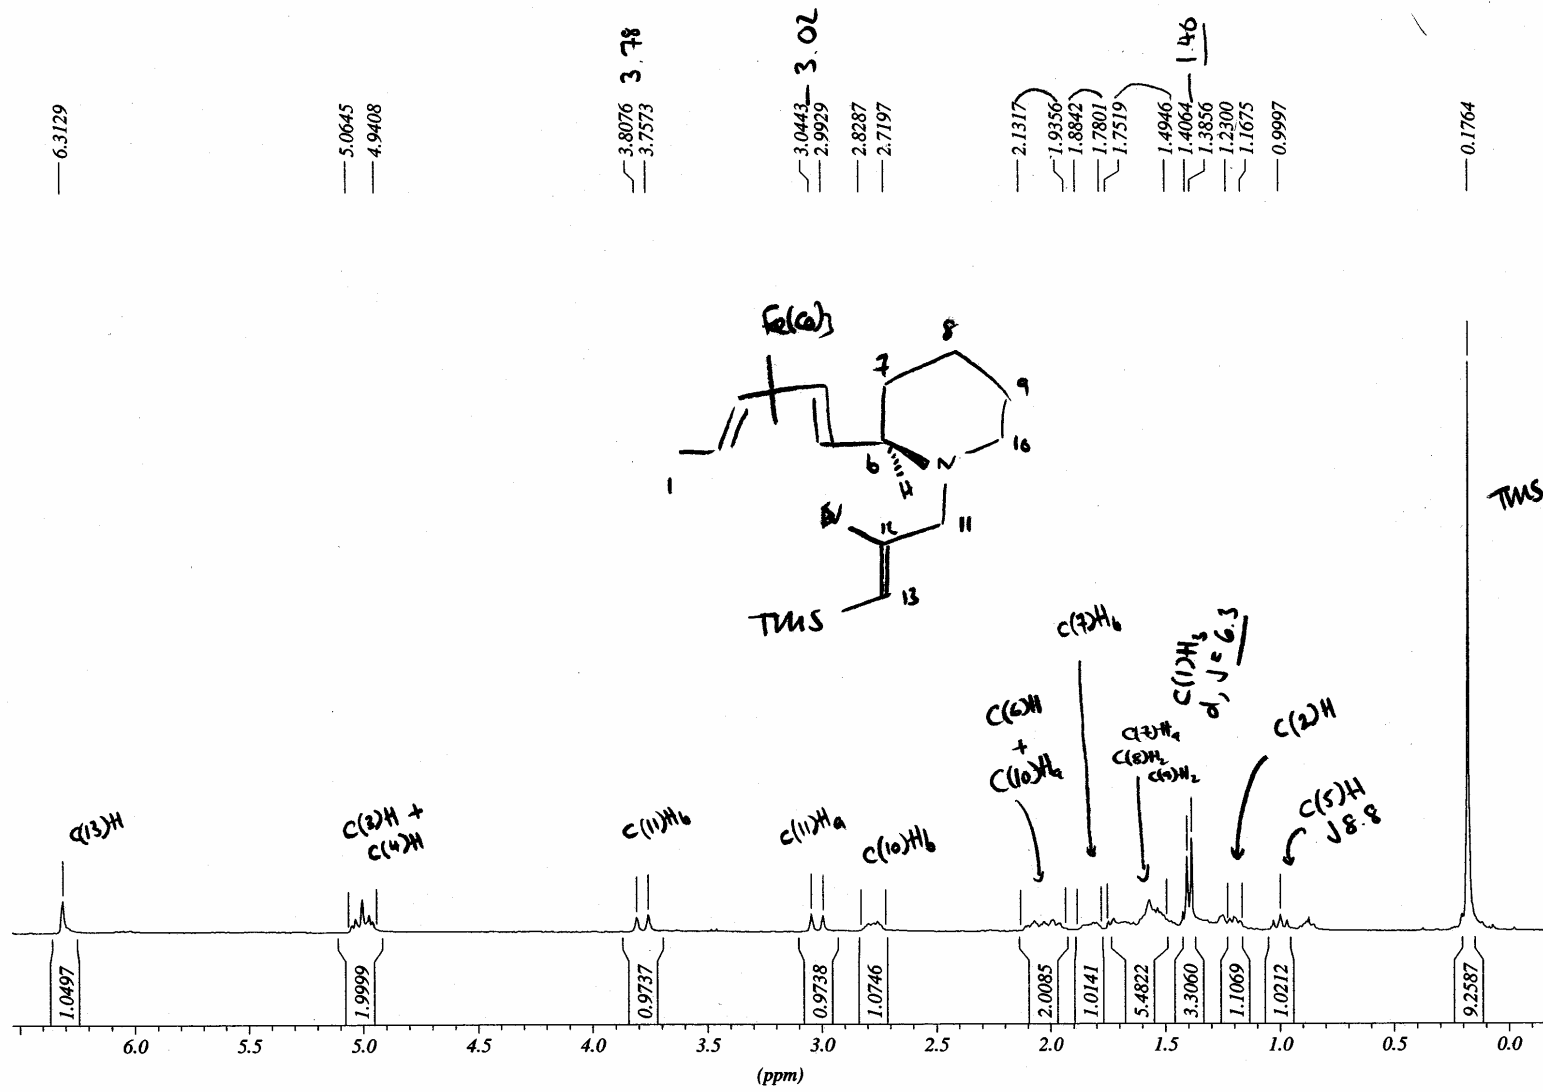

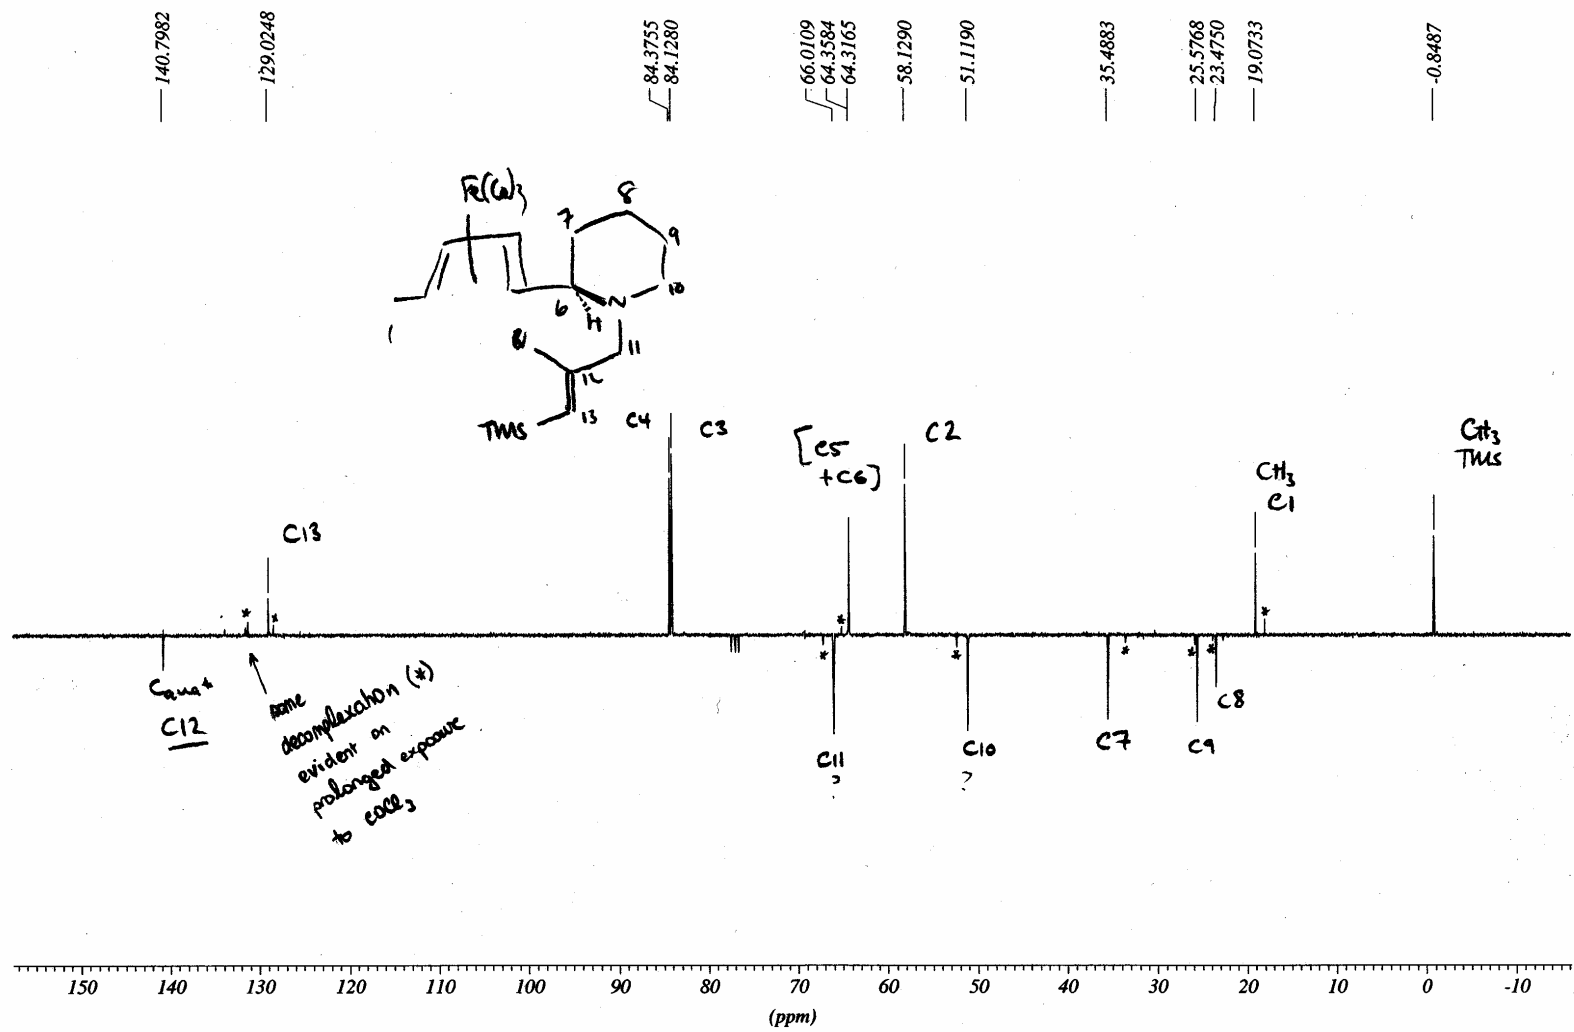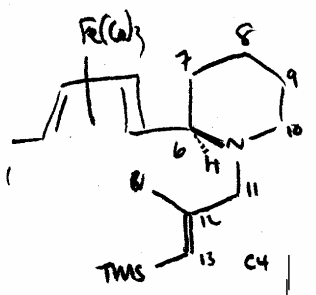

C12  
 some decoupling (\*)  
 evident on  
 prolonged exposure  
 to C13

(ppm)

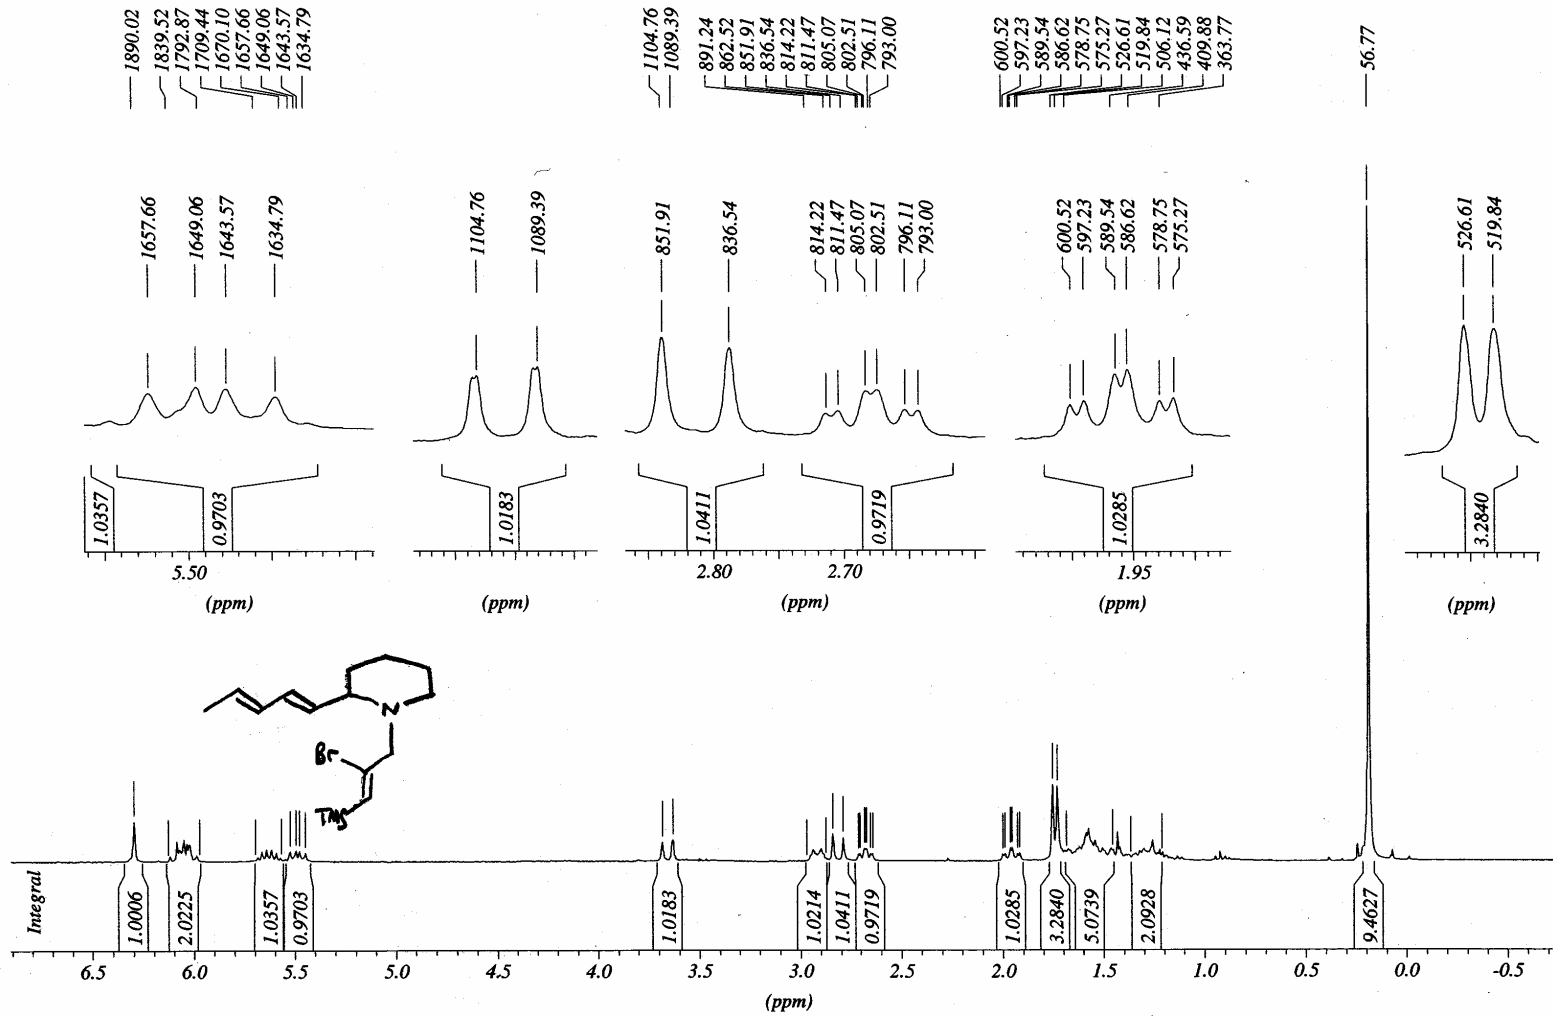

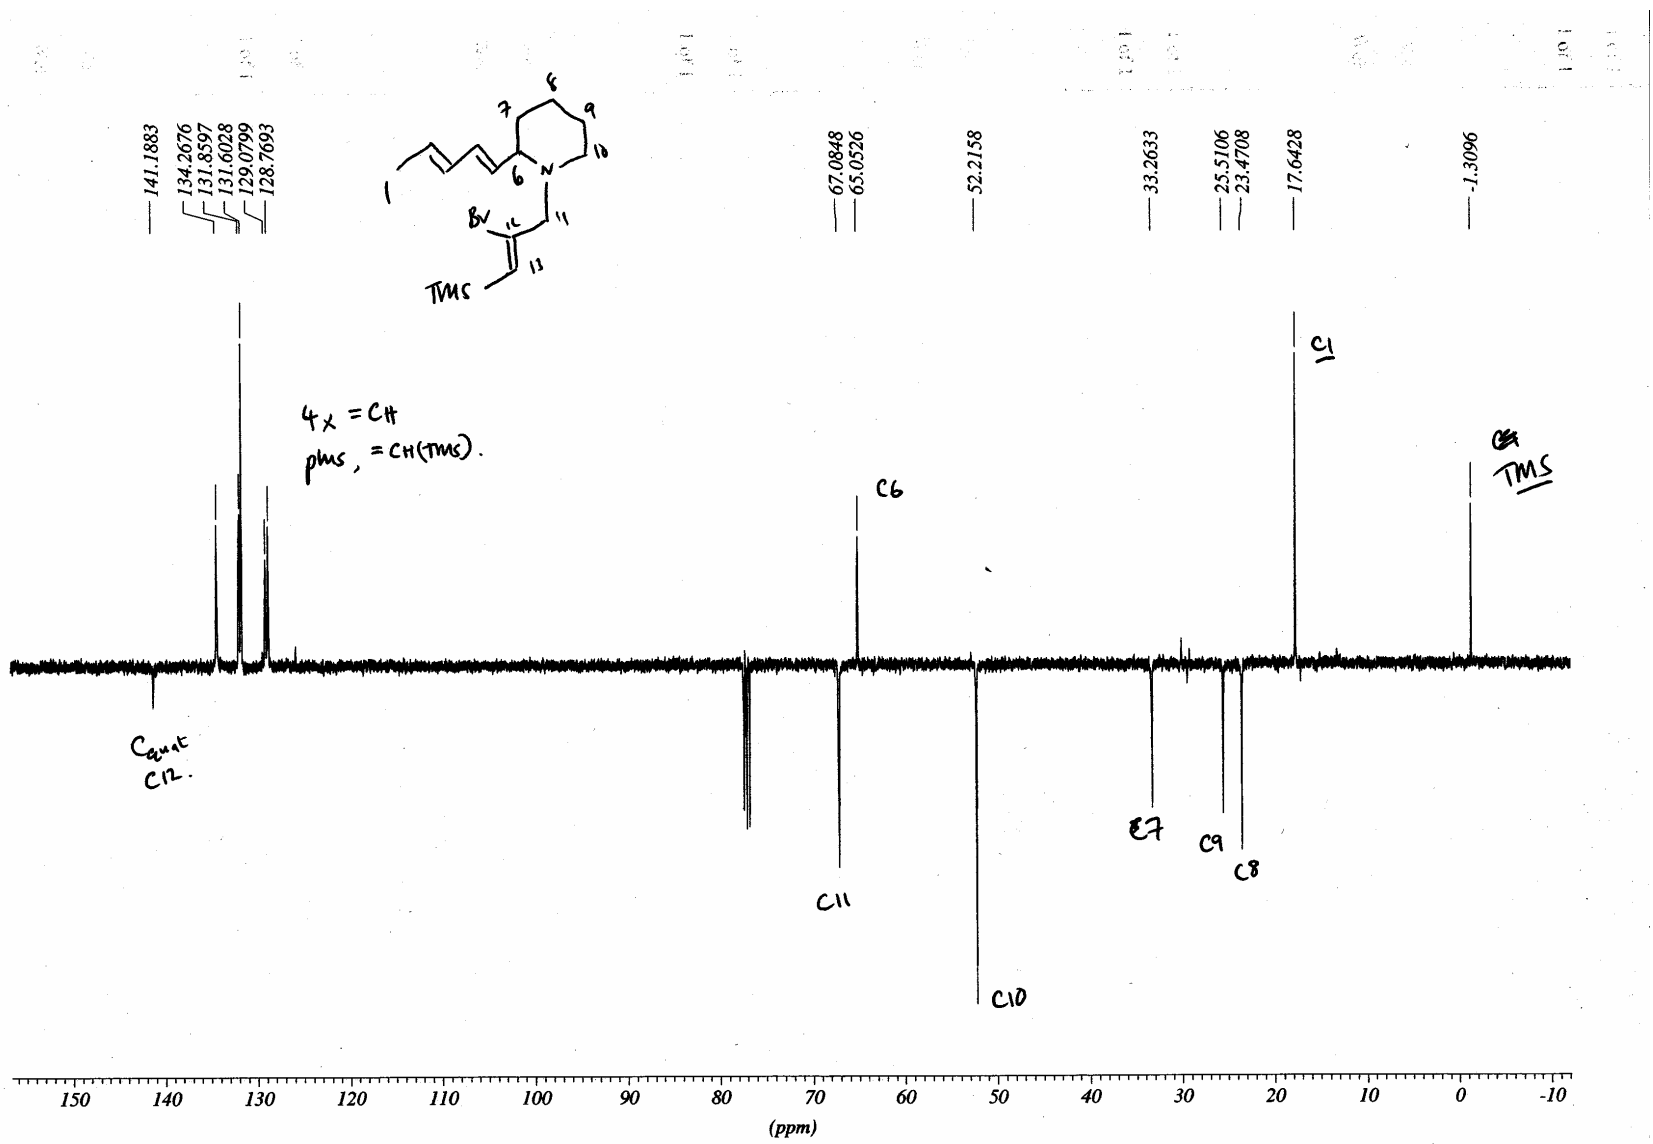

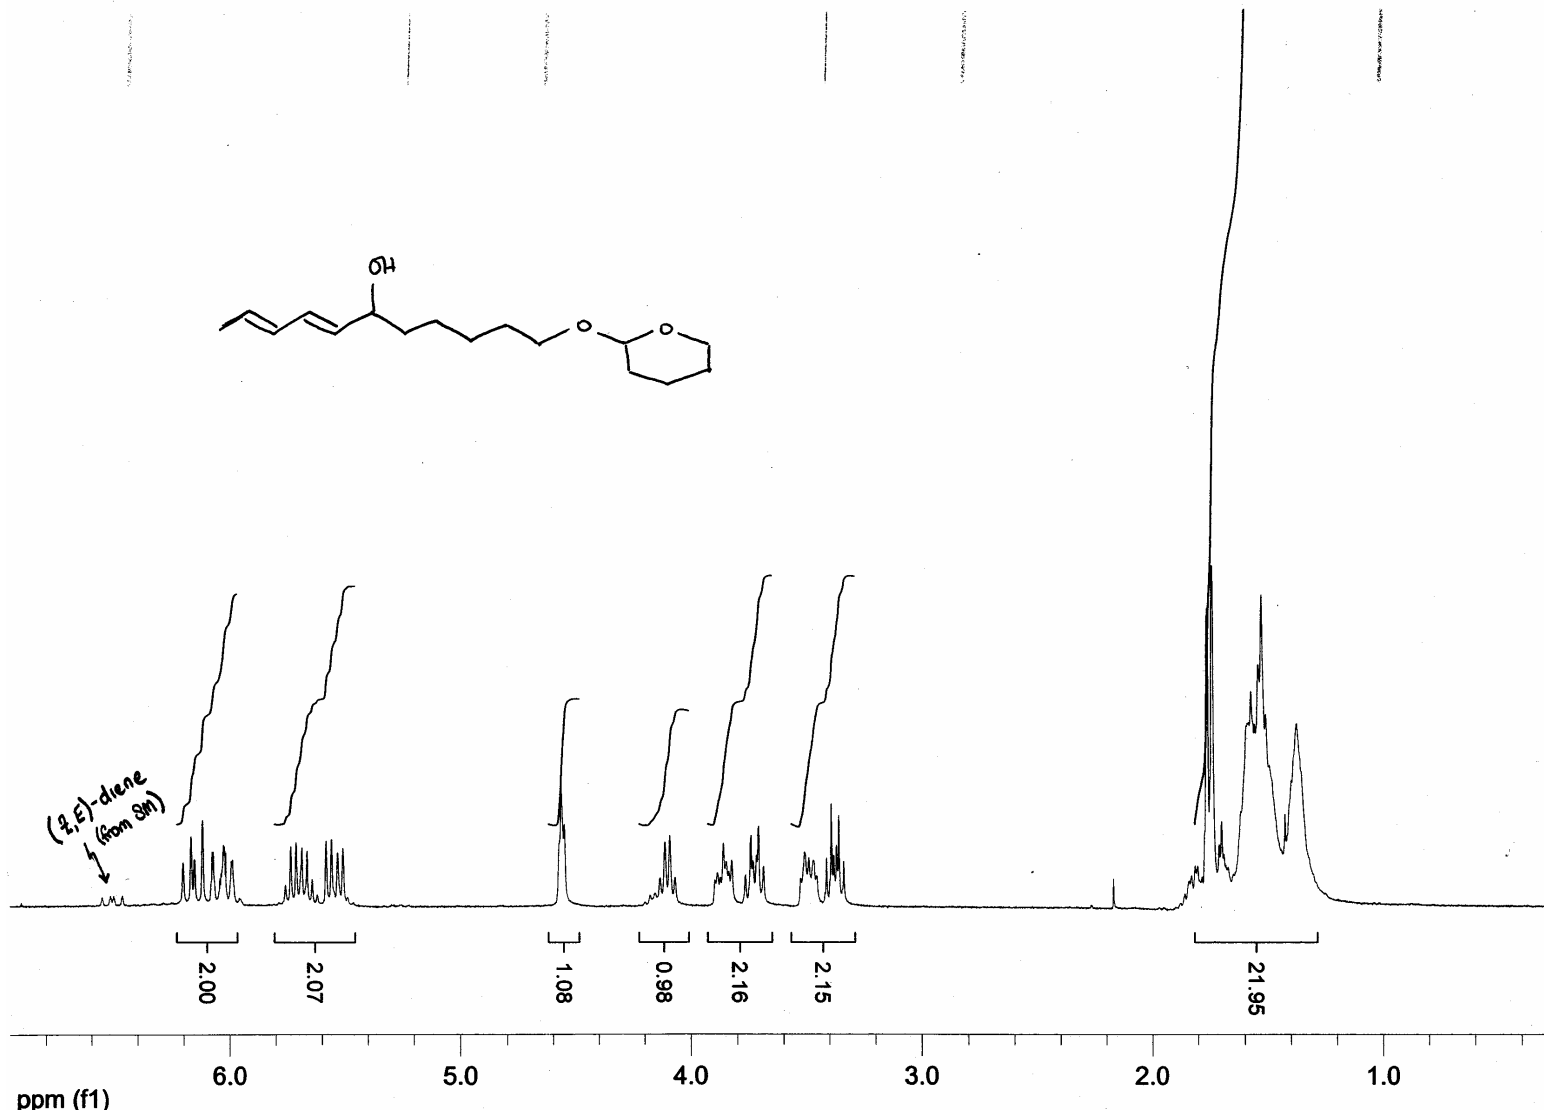



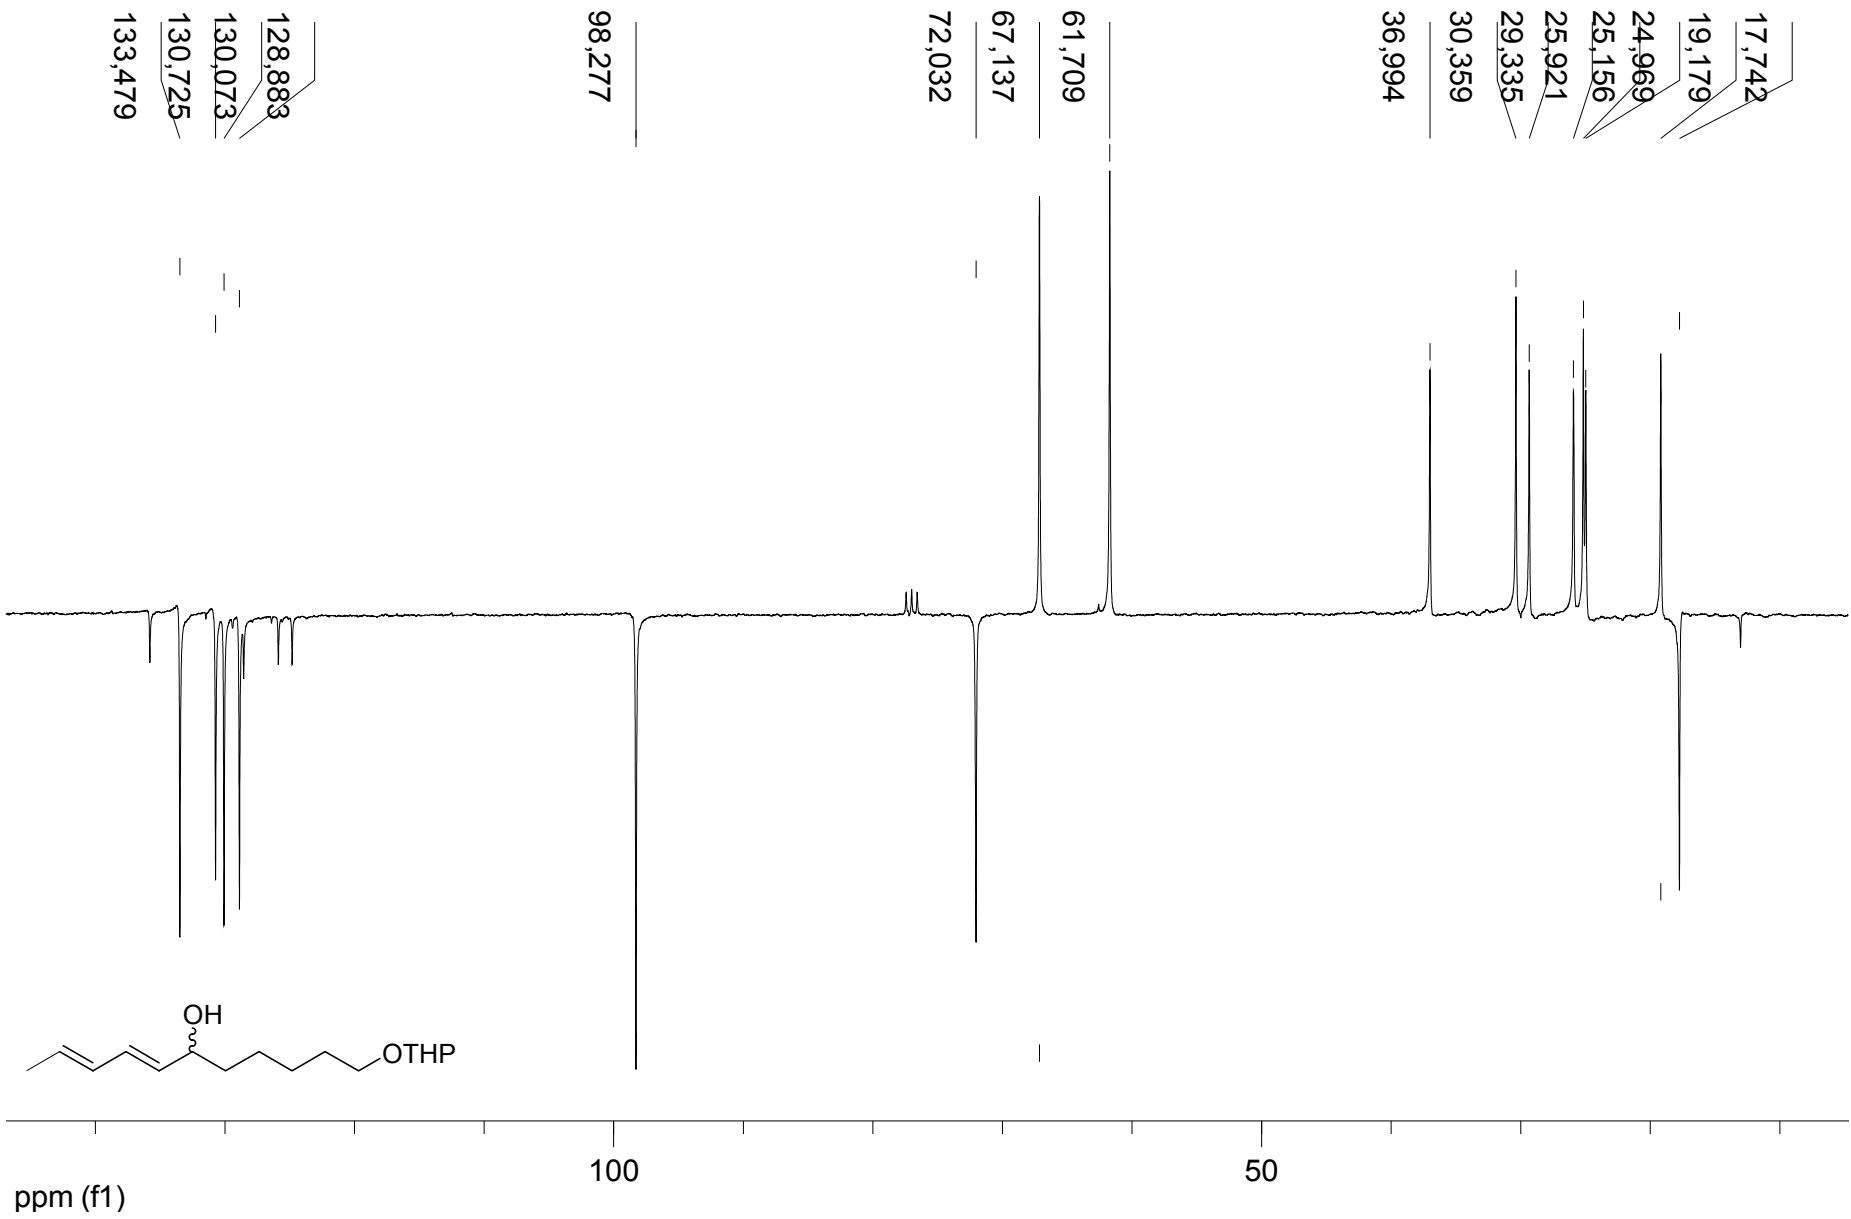

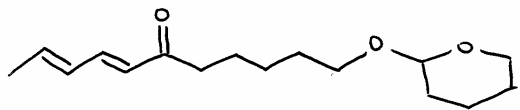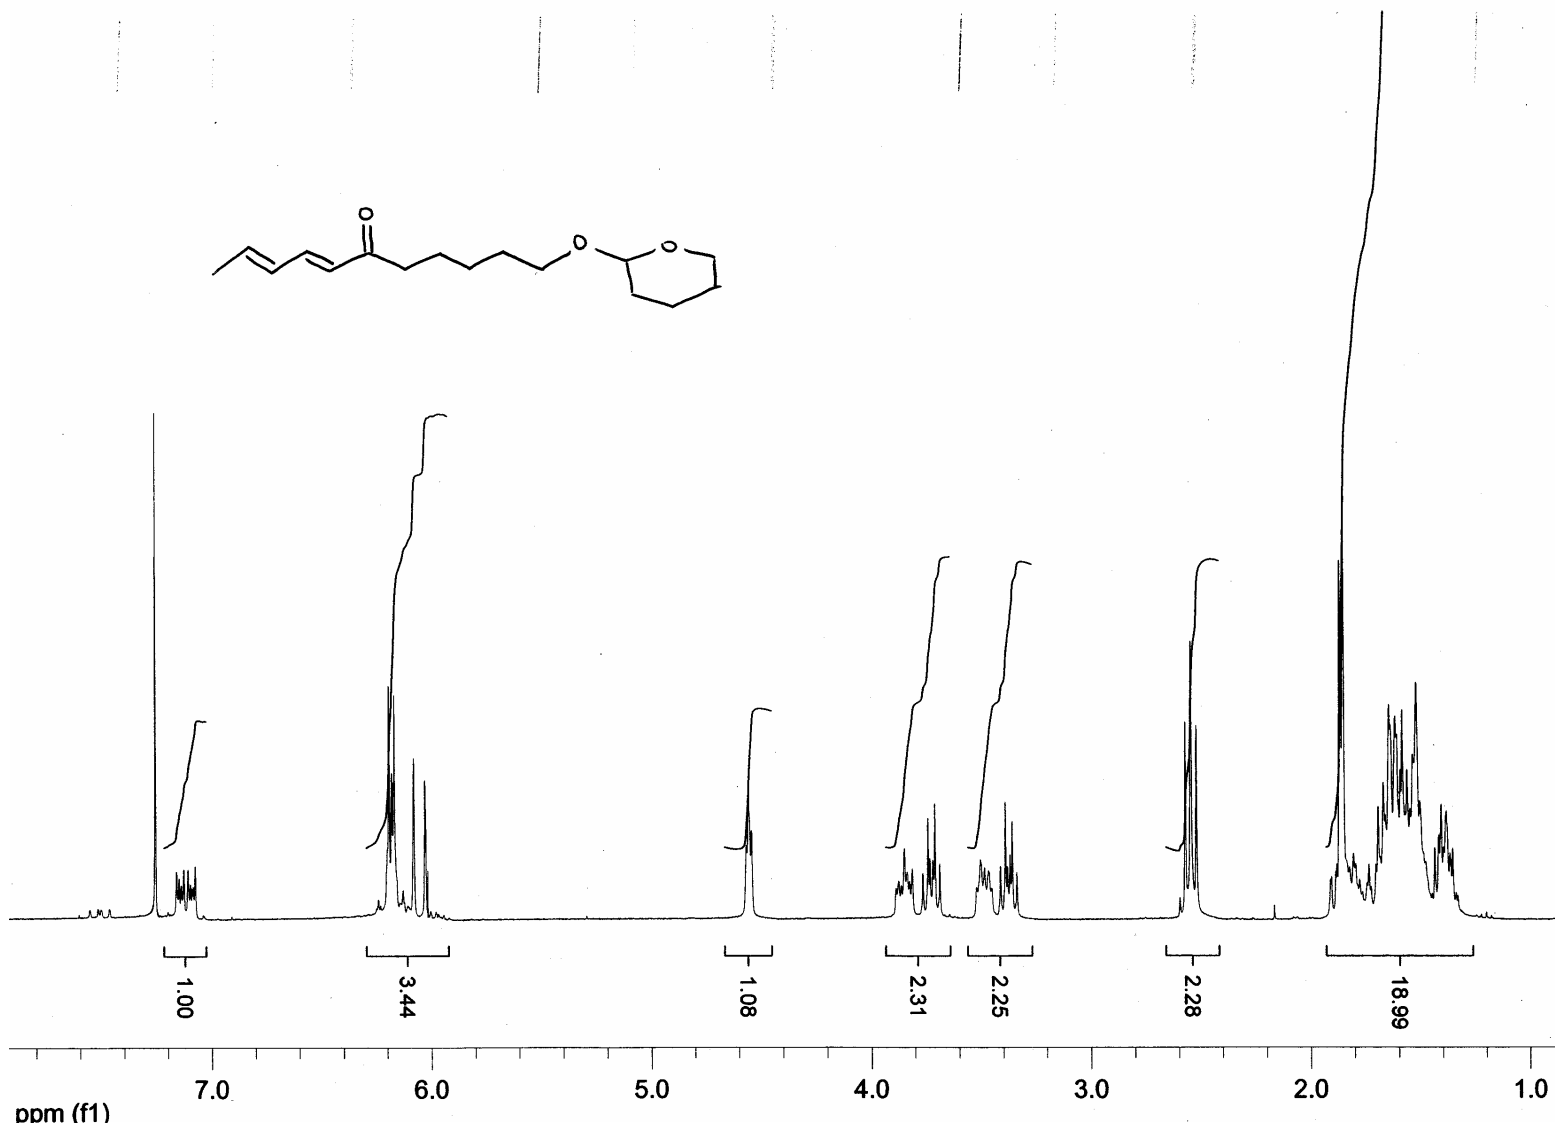

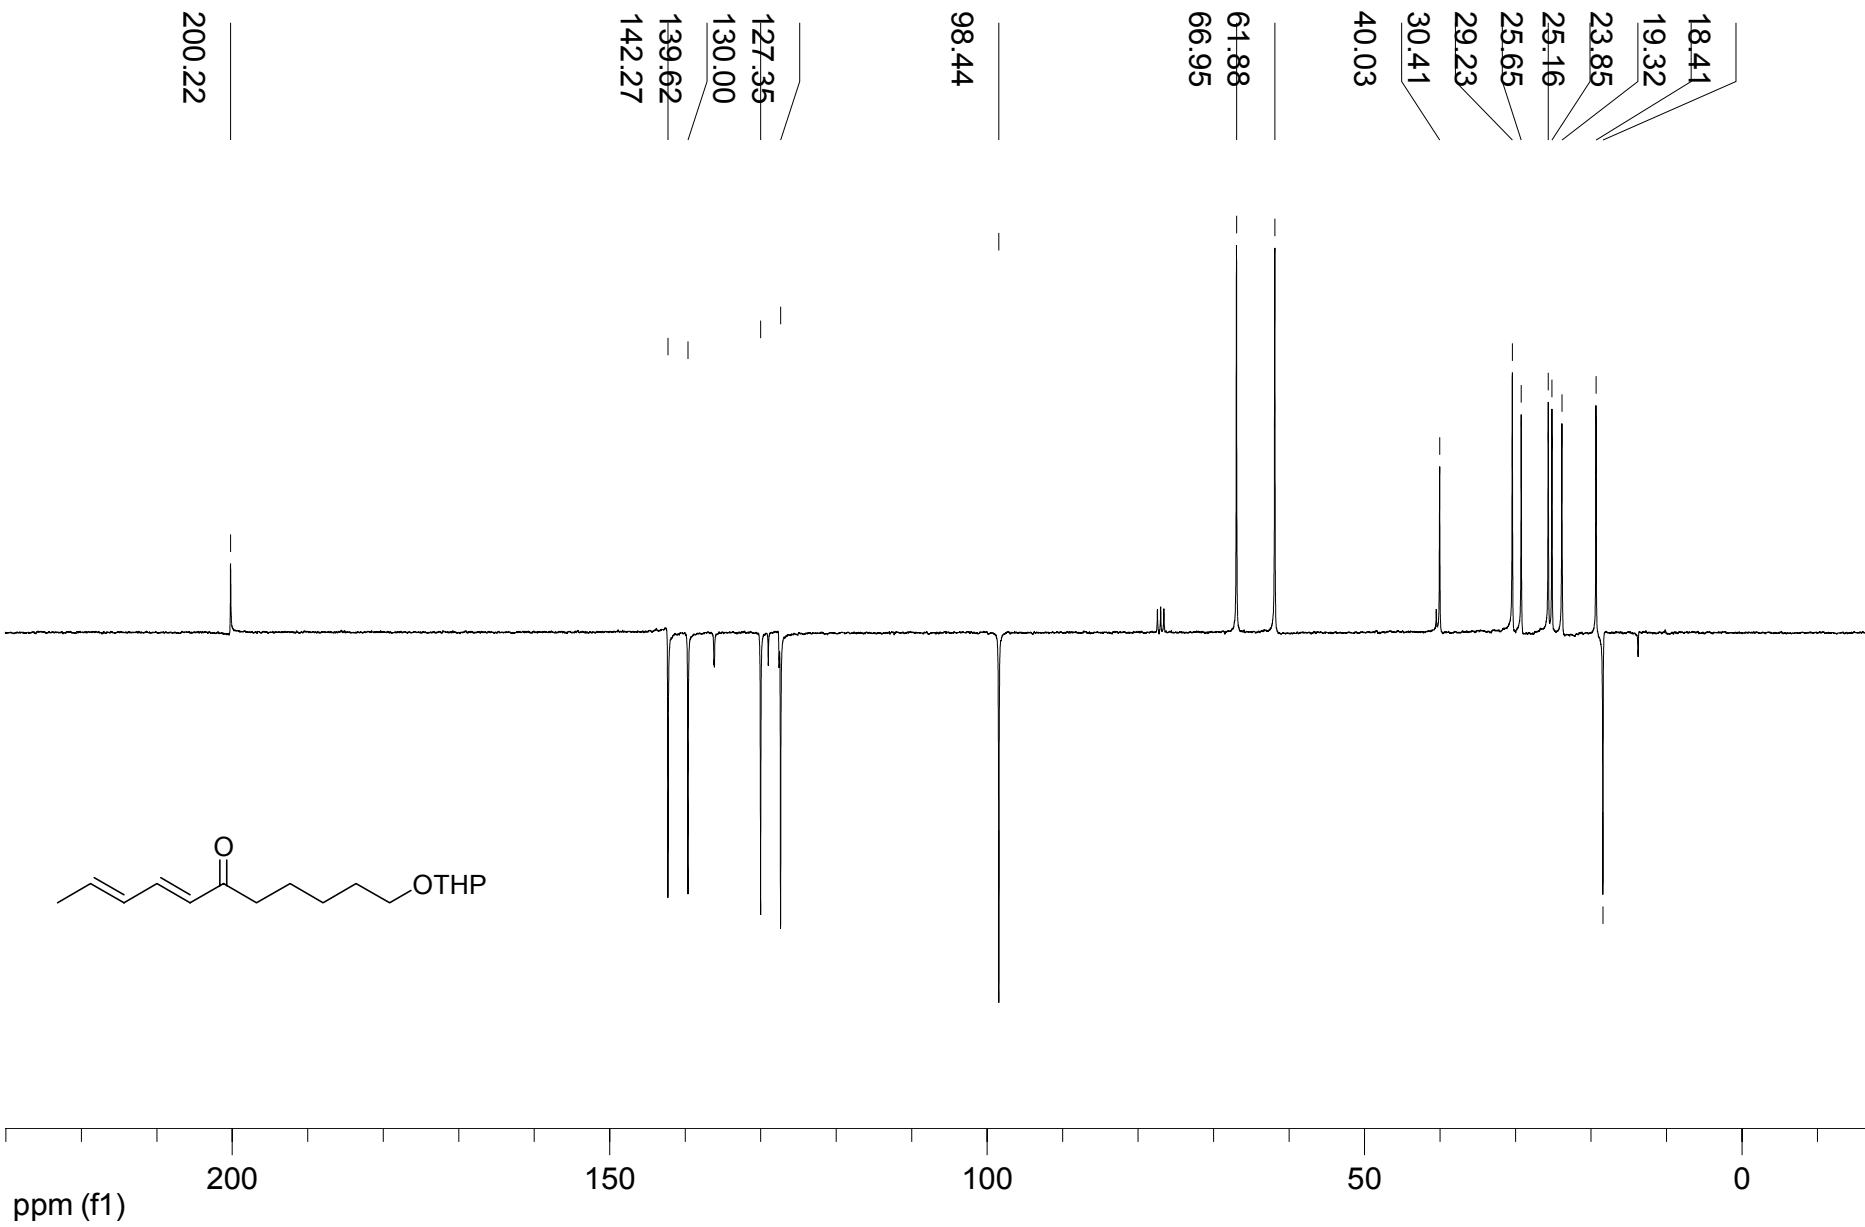

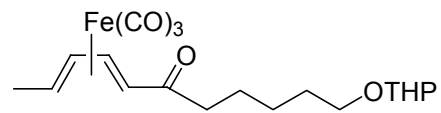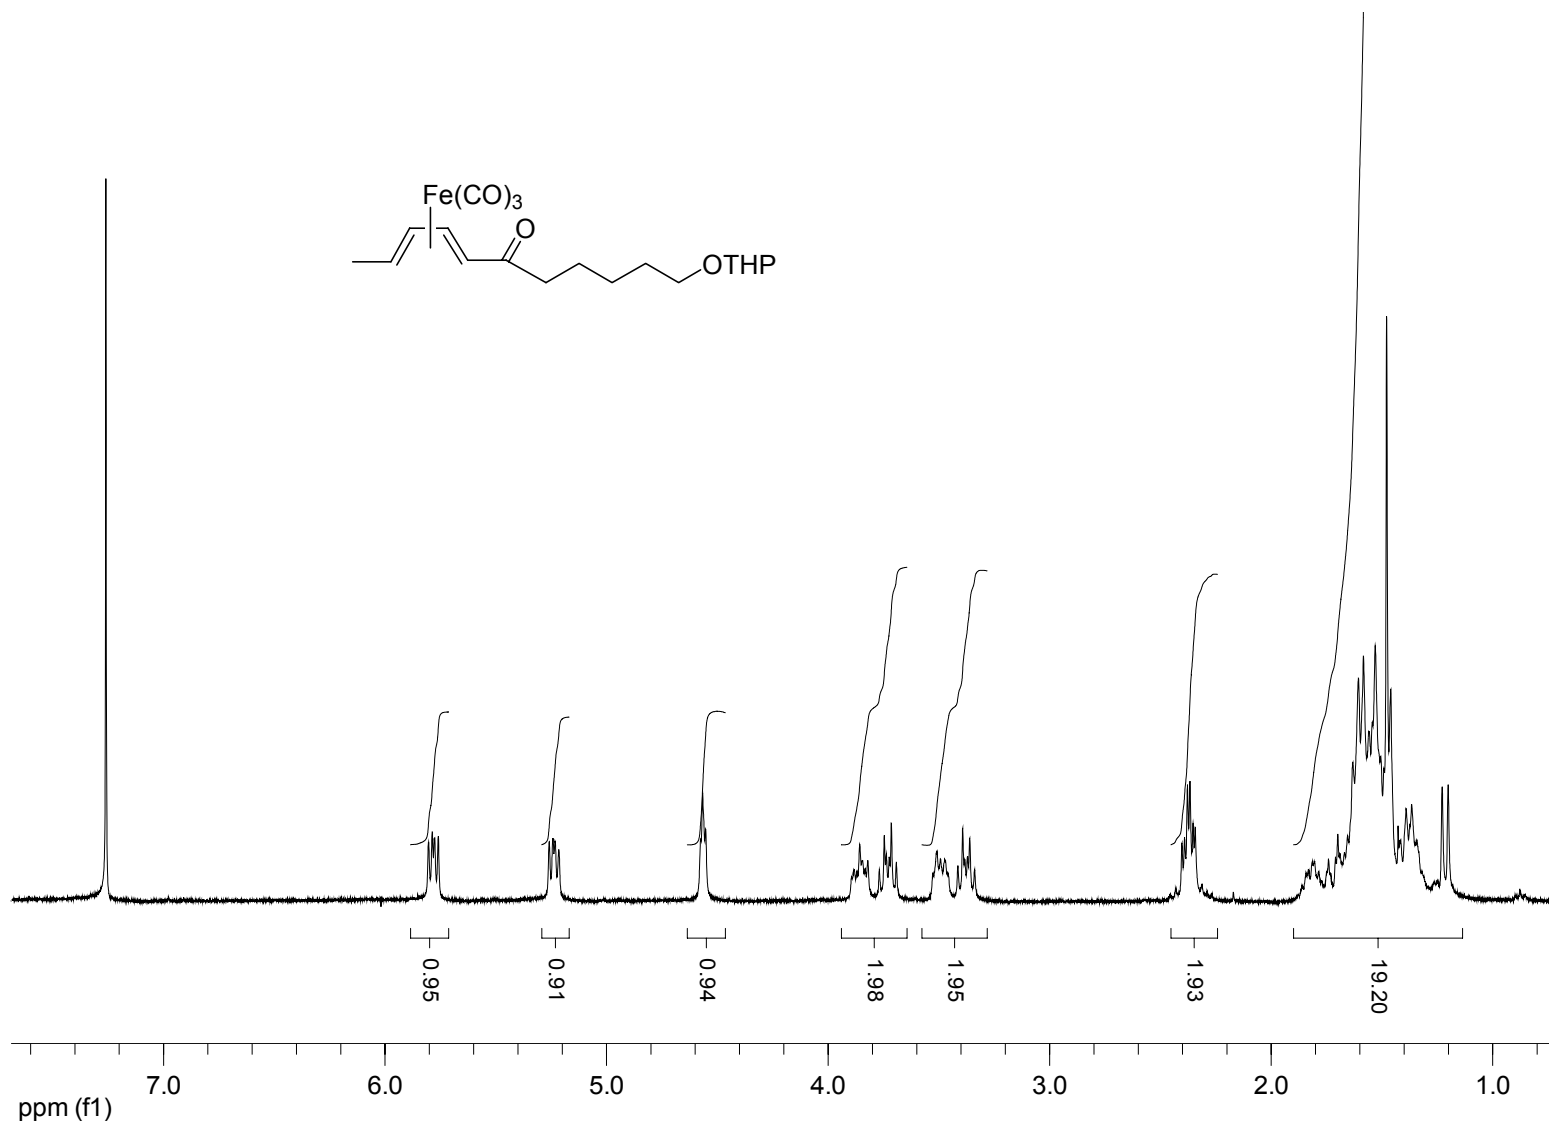

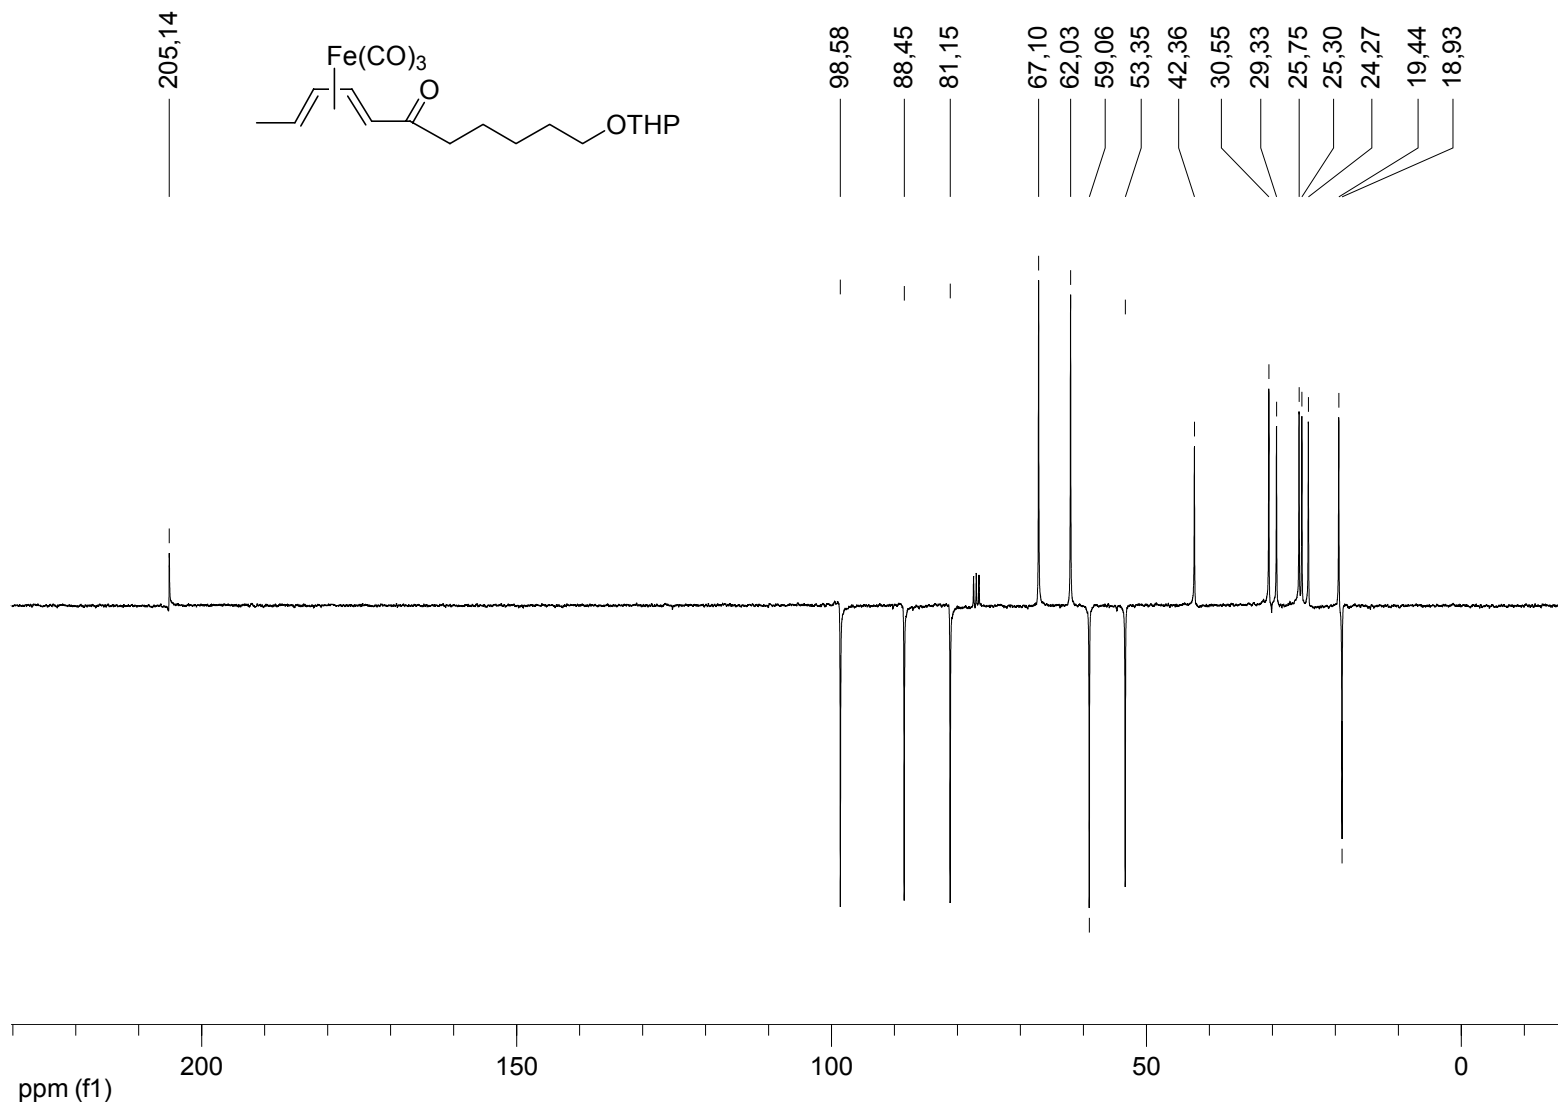

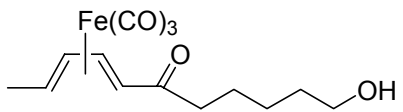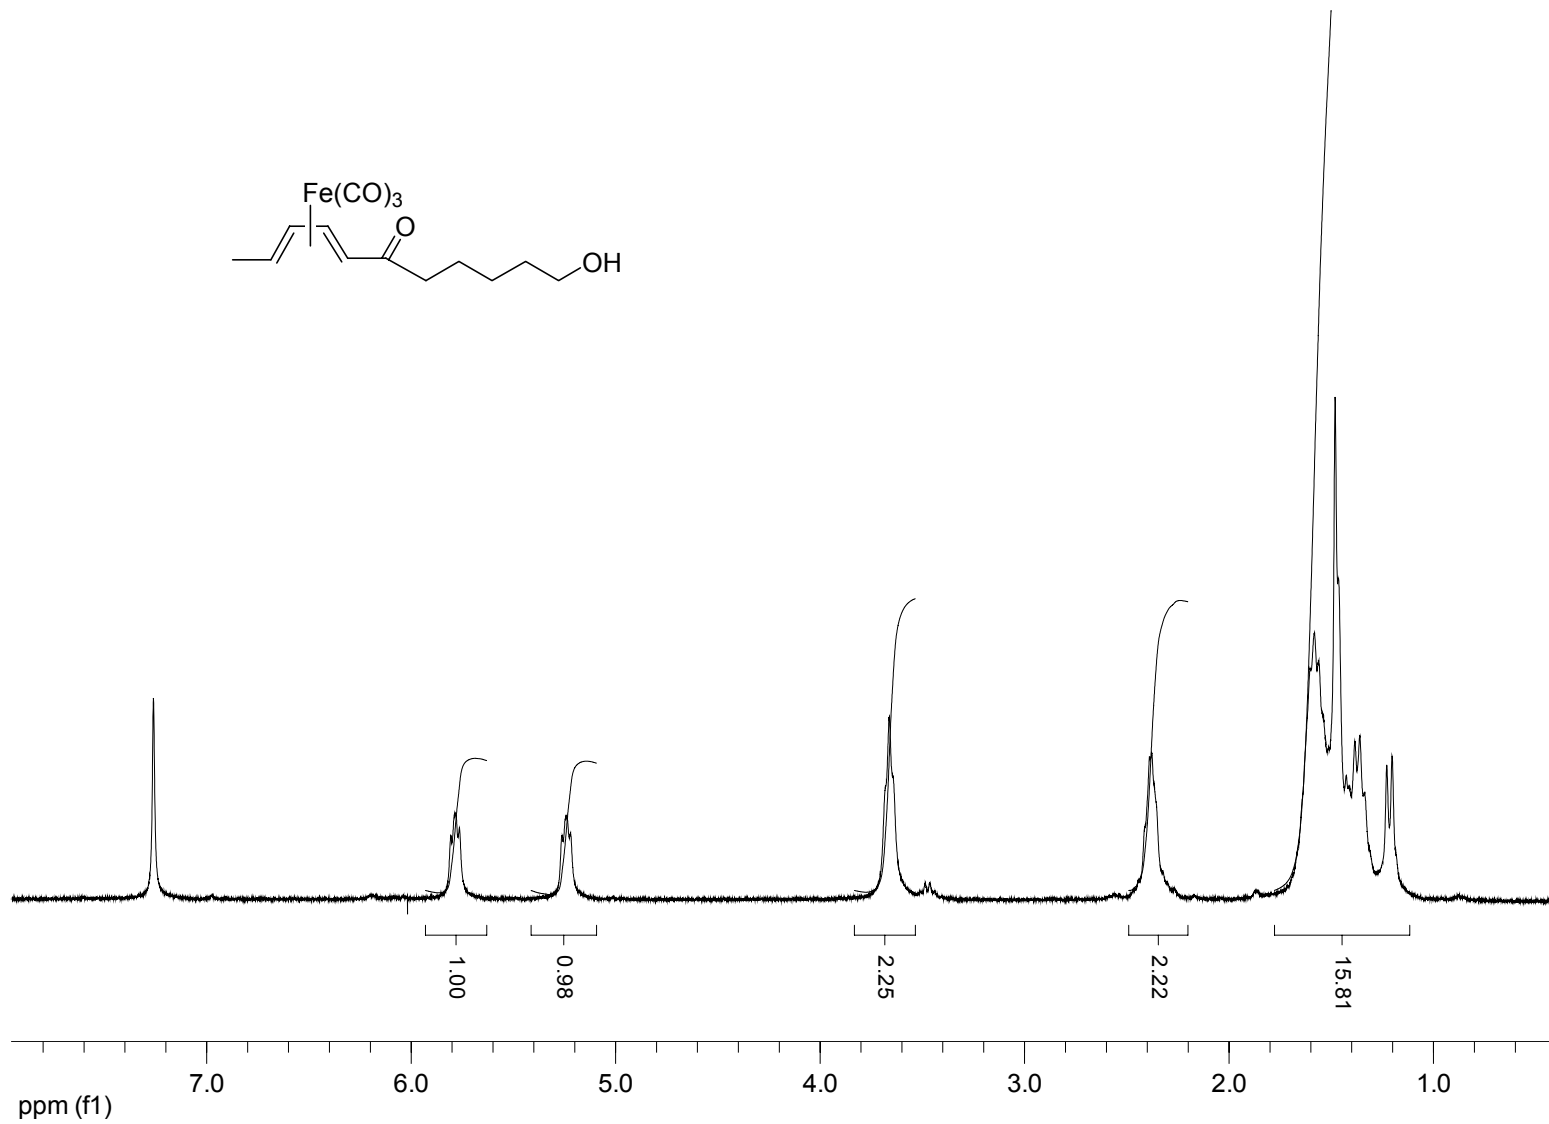

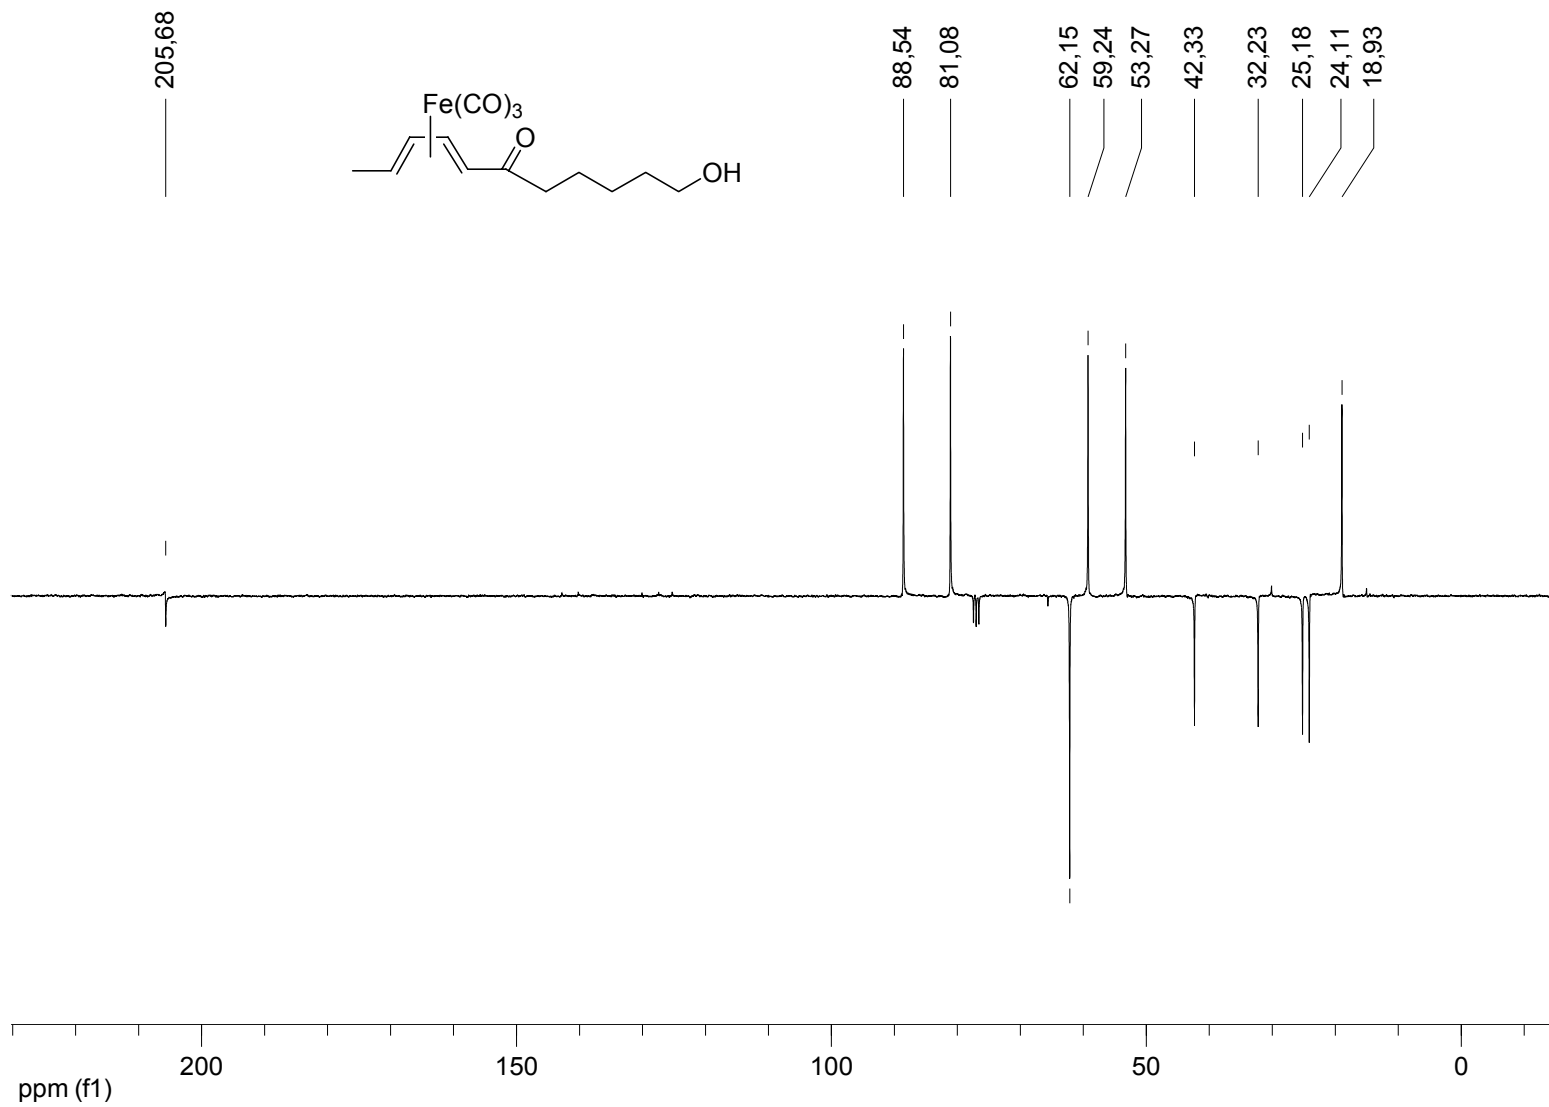

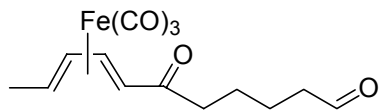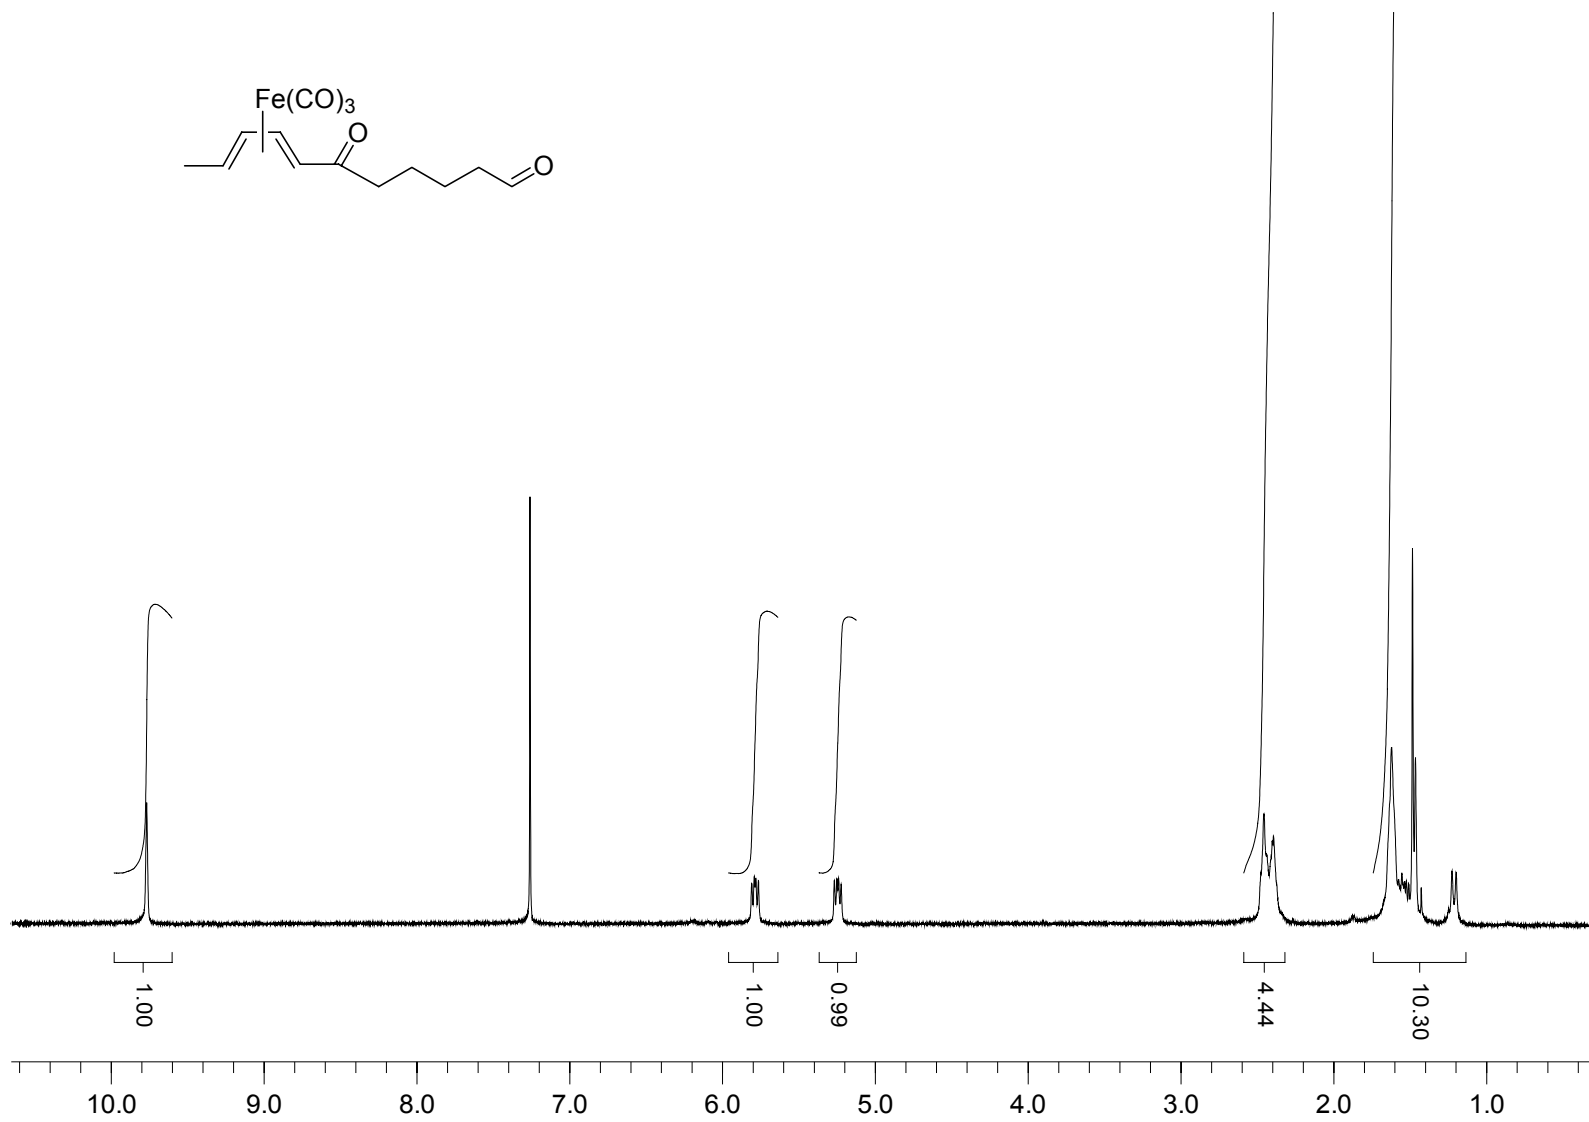



204.67  
202.01

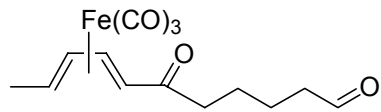

88.58

81.07

59.32

53.22

43.41

41.90

23.70

21.40

18.95

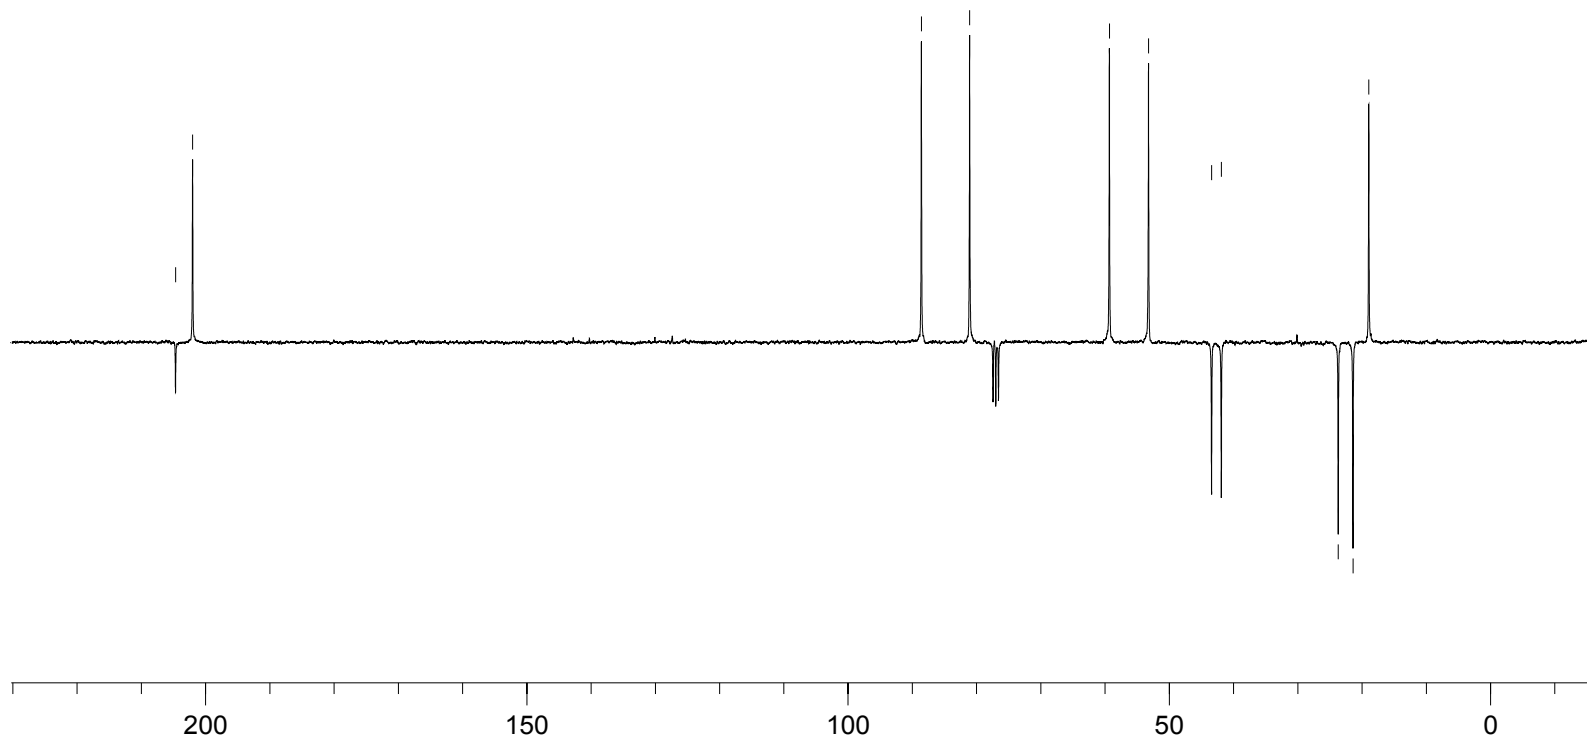

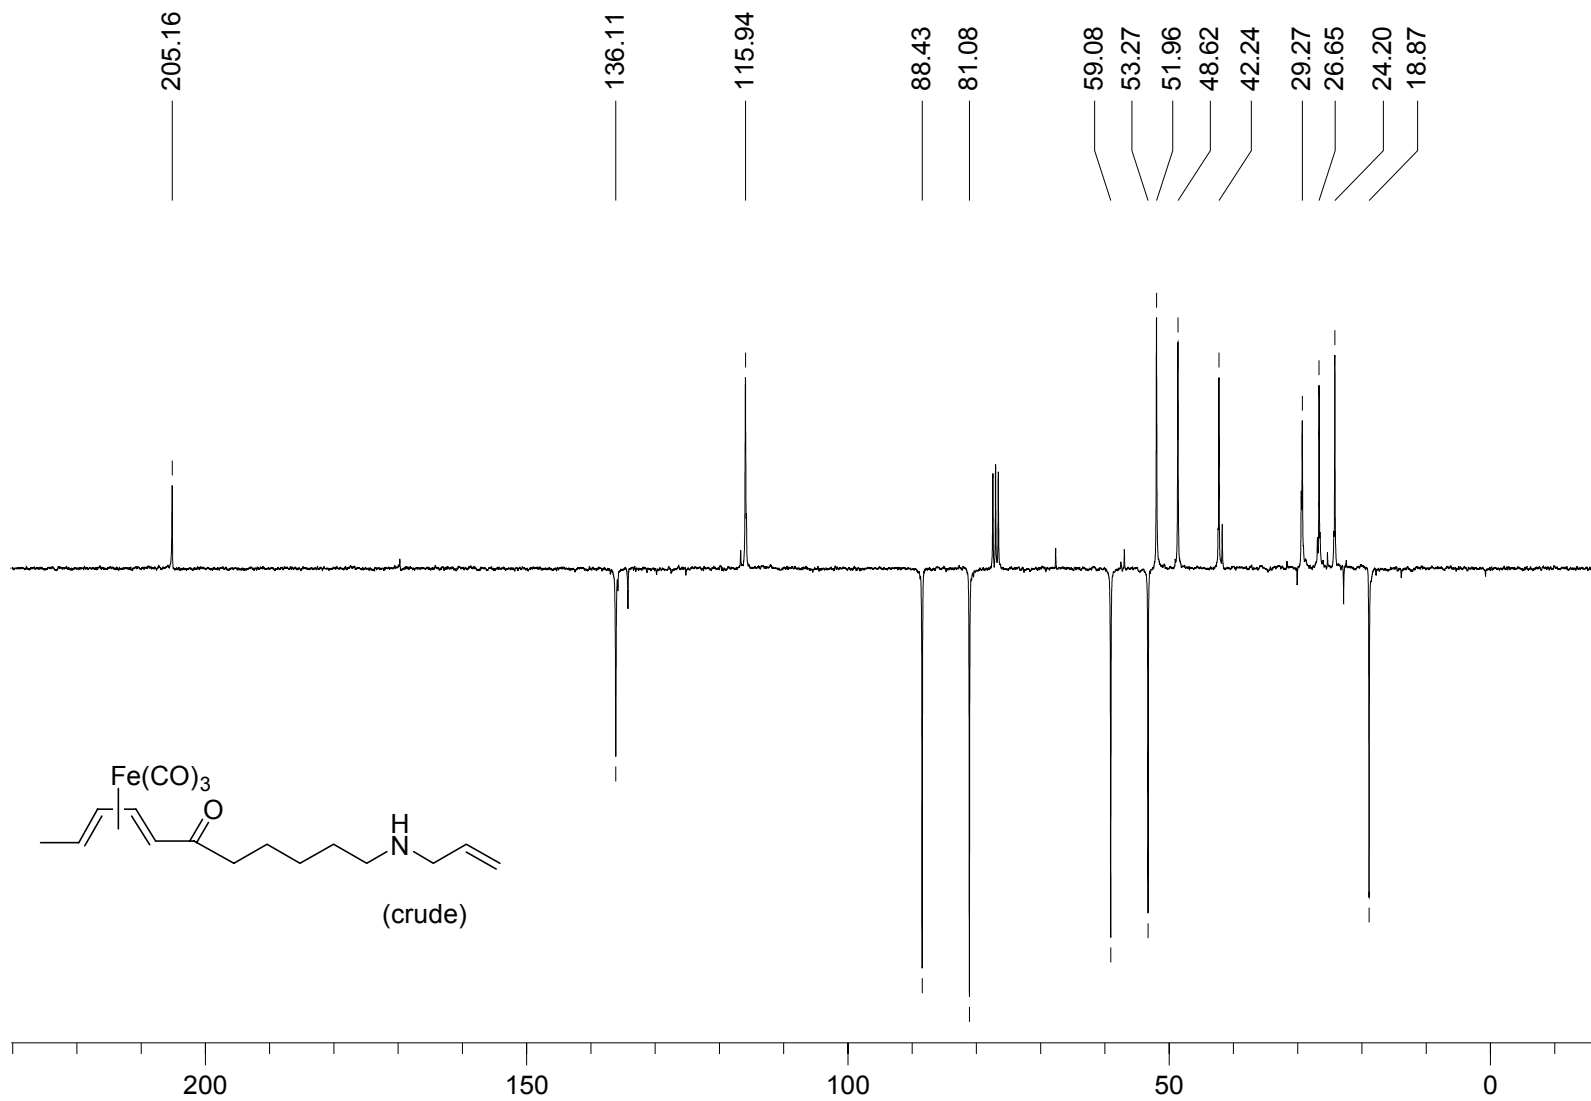

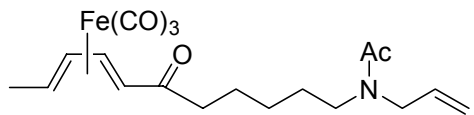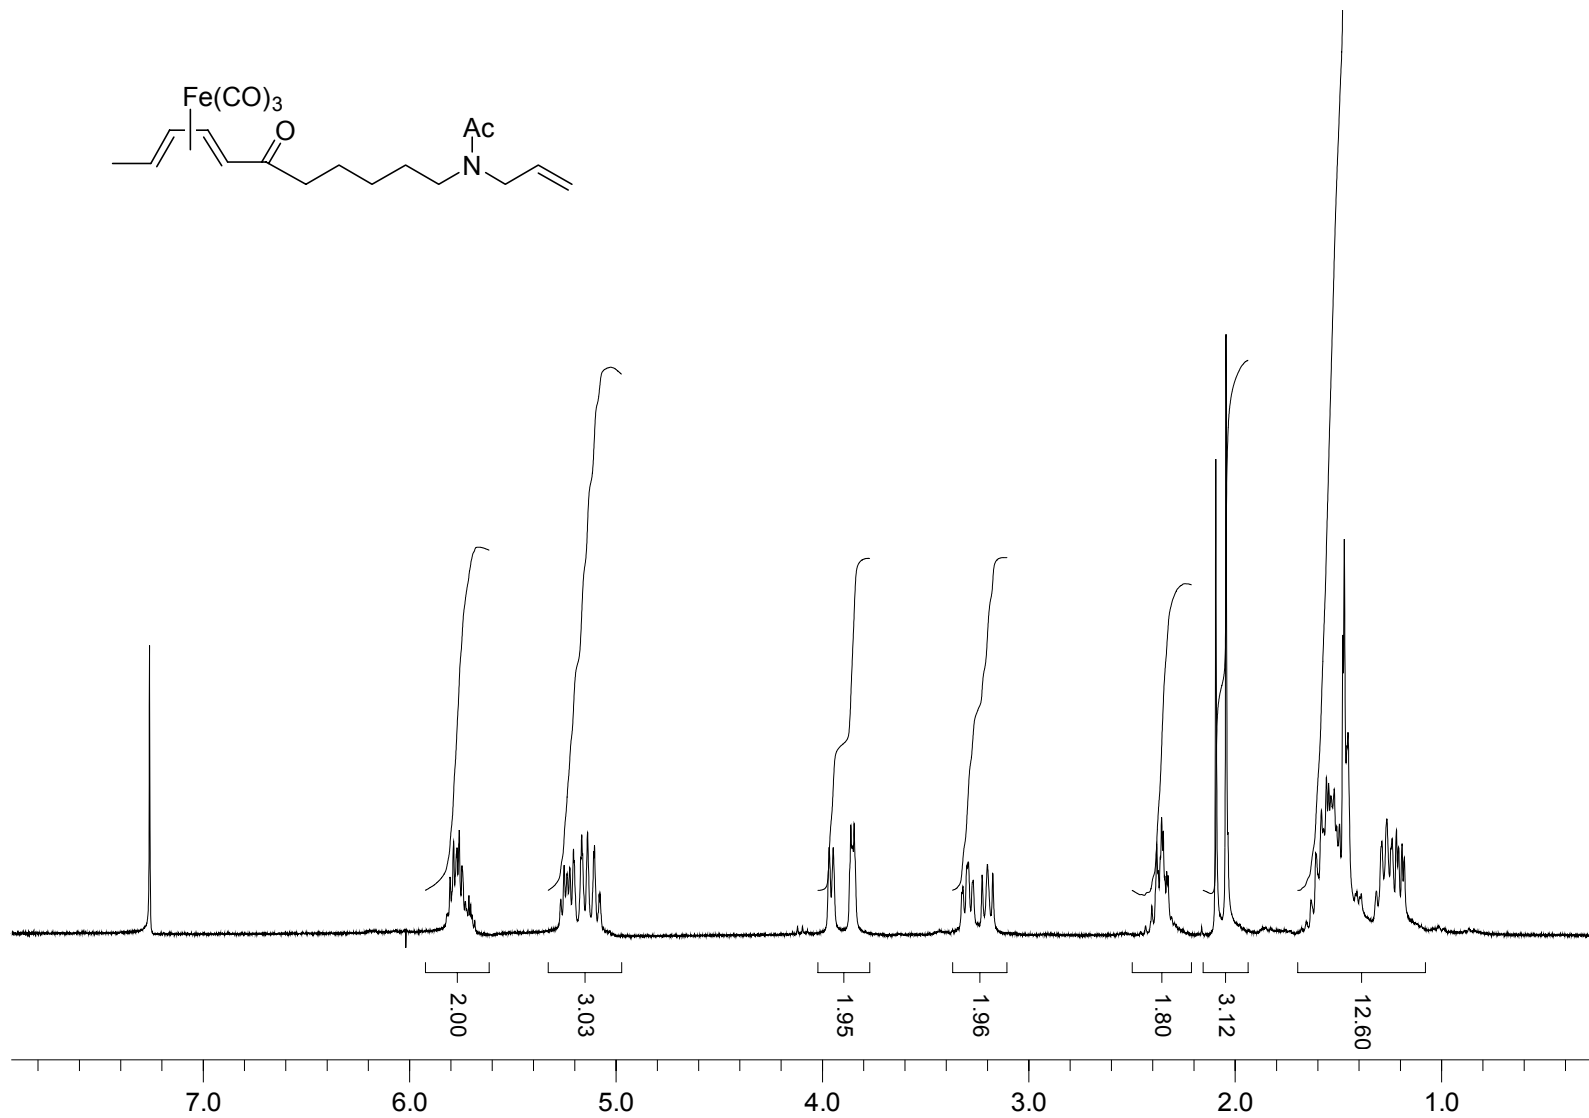

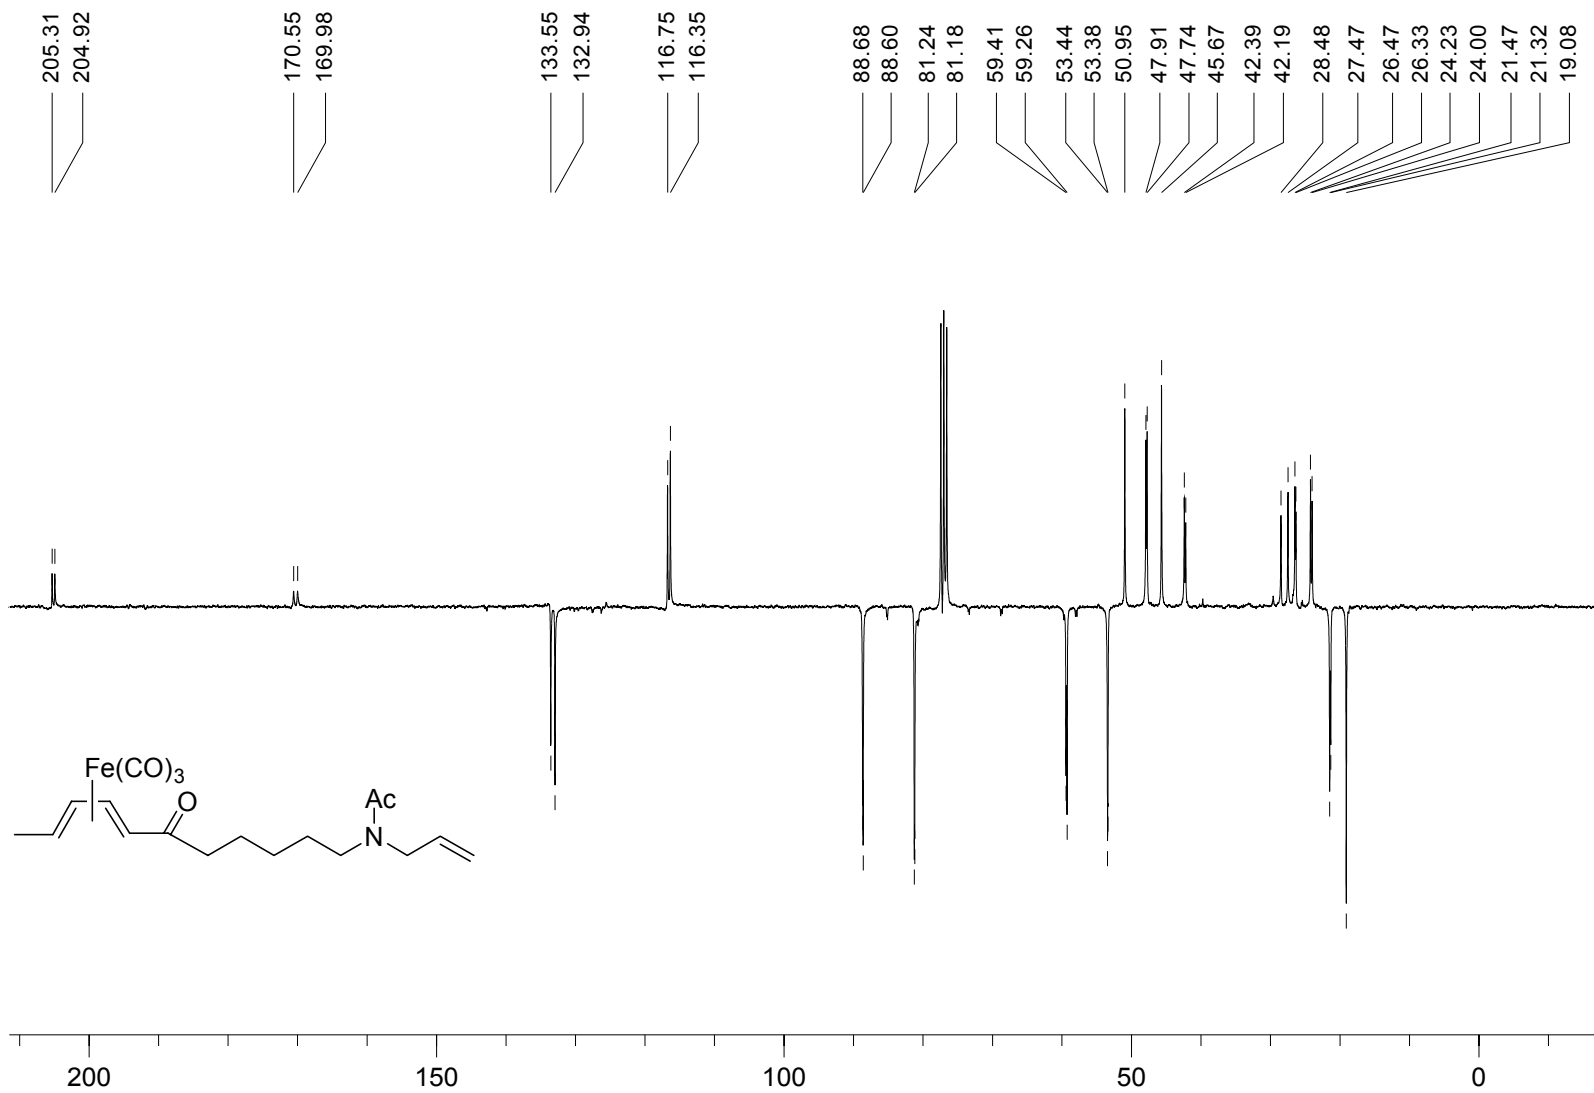

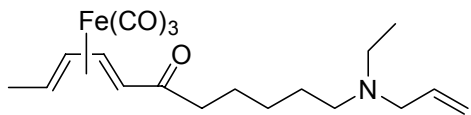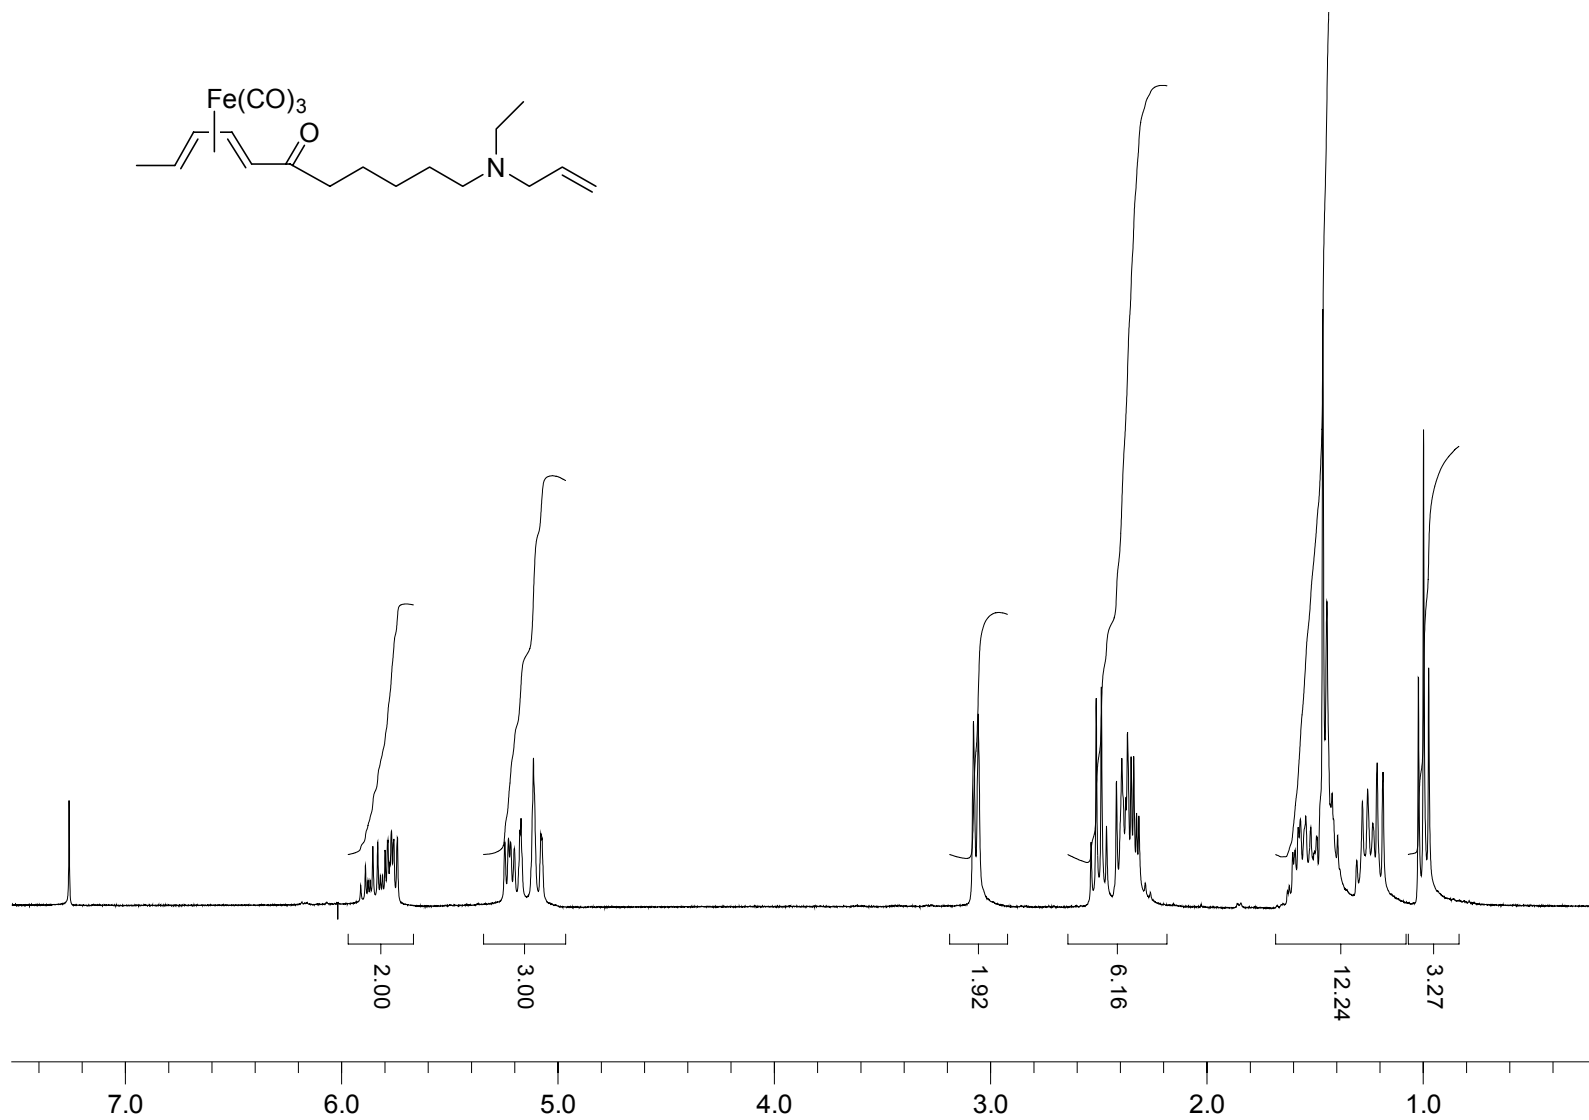

W/9/21 Bottom spot

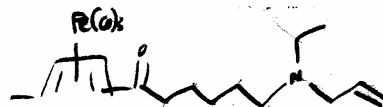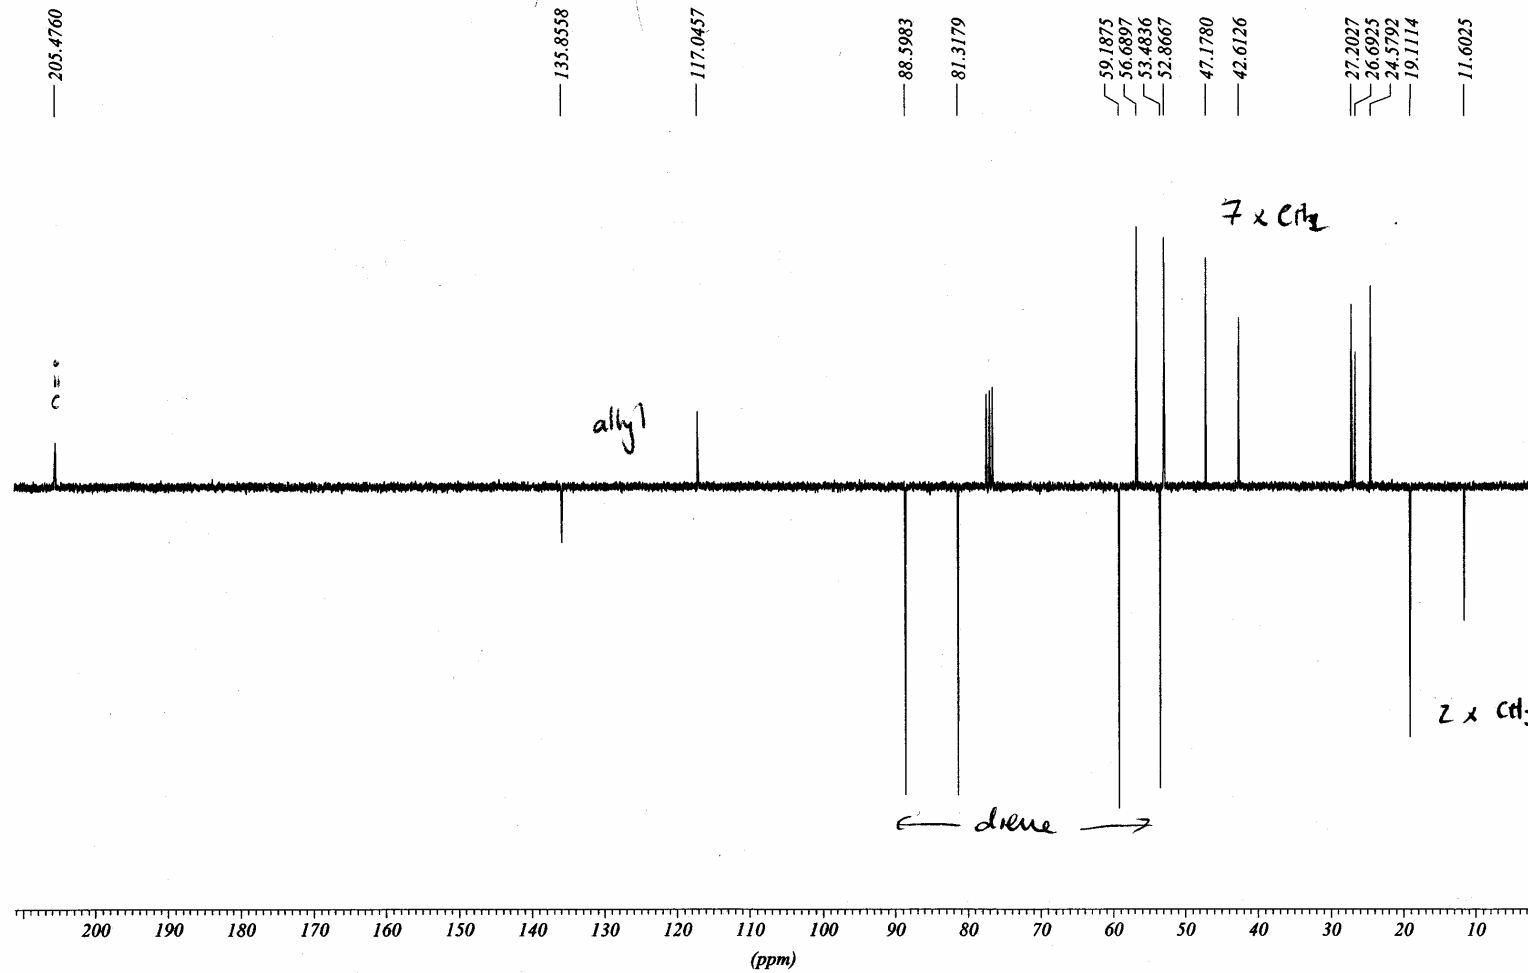

INW - IWAN WILLIAMS IW/9/33 (CRUDE) (MAY 18<sup>th</sup>, pas<sup>m</sup> no 22)

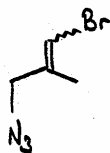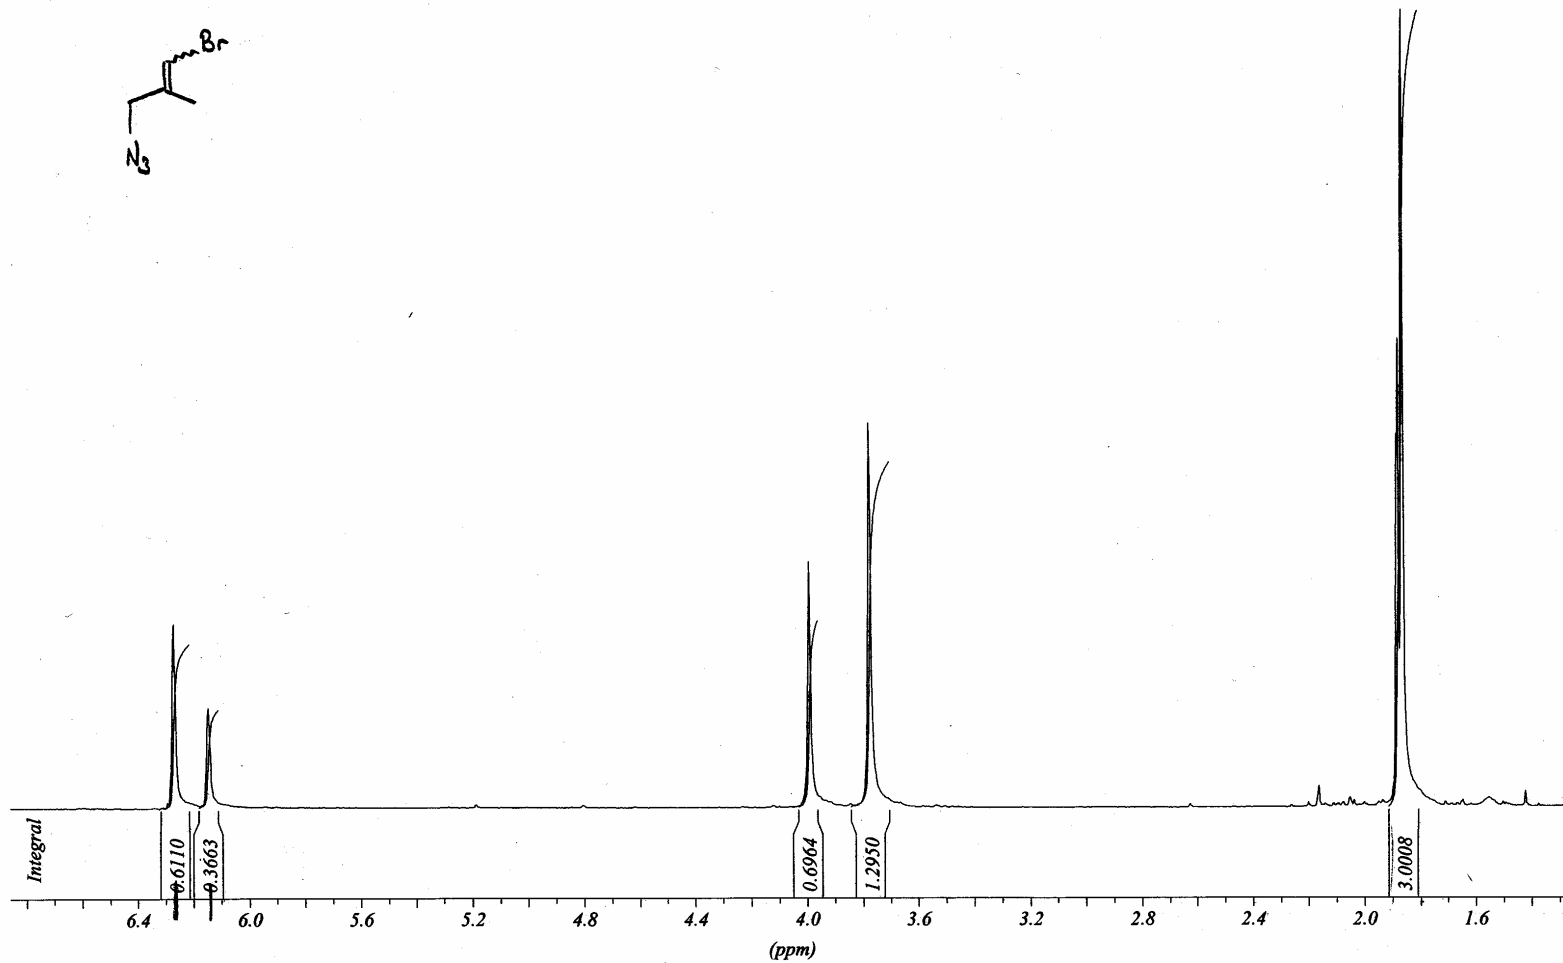

1W/9/33 crude (18 may, spec 3)

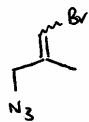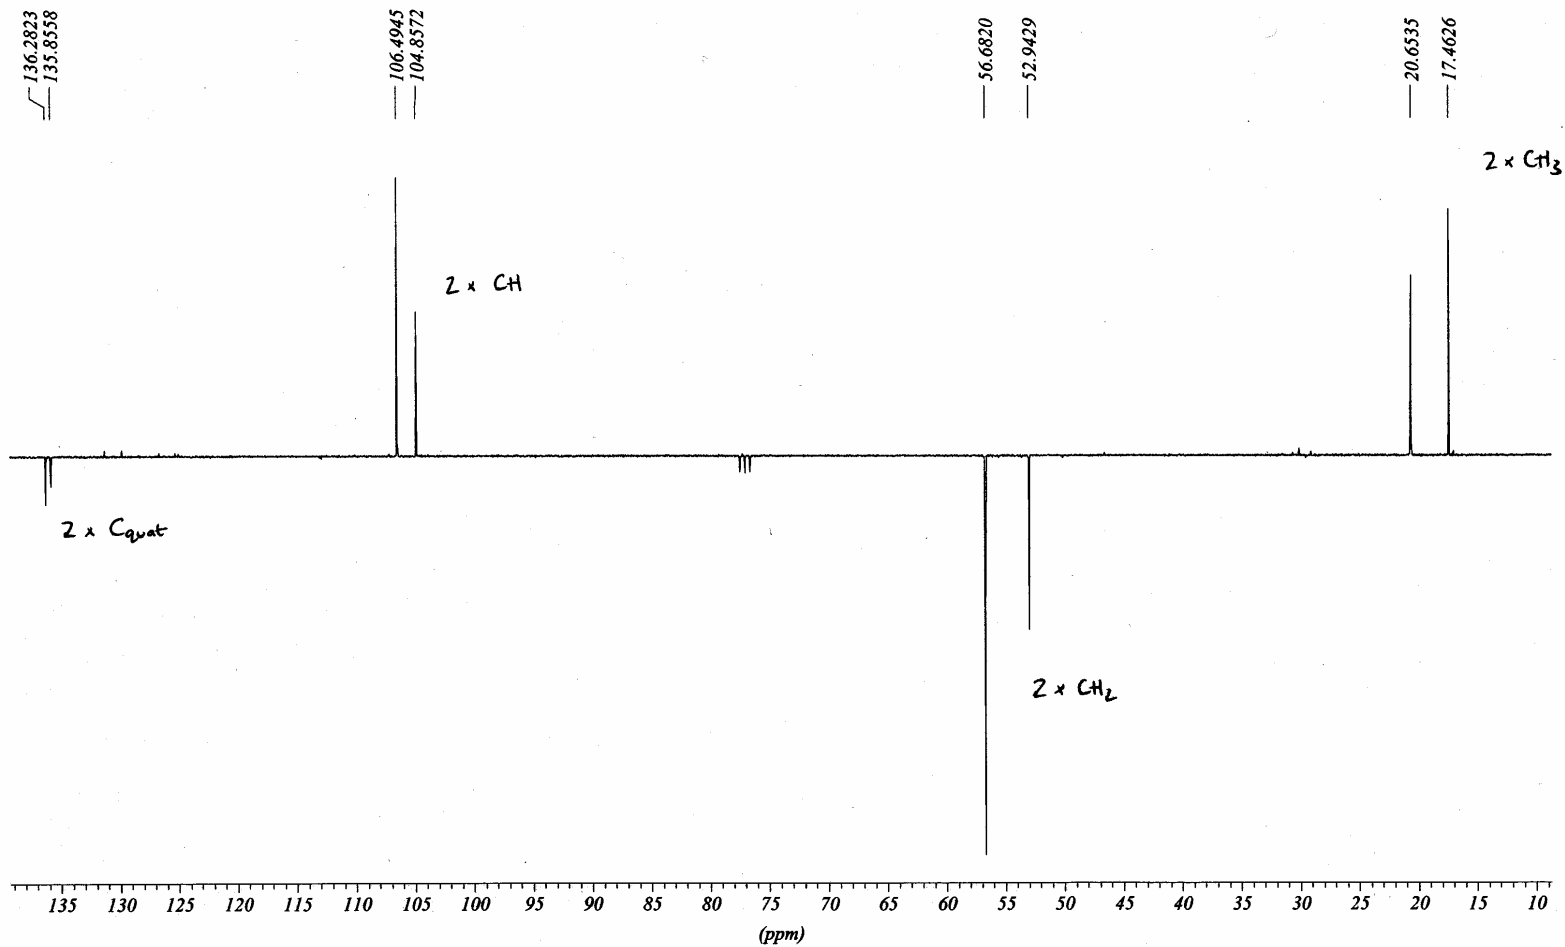



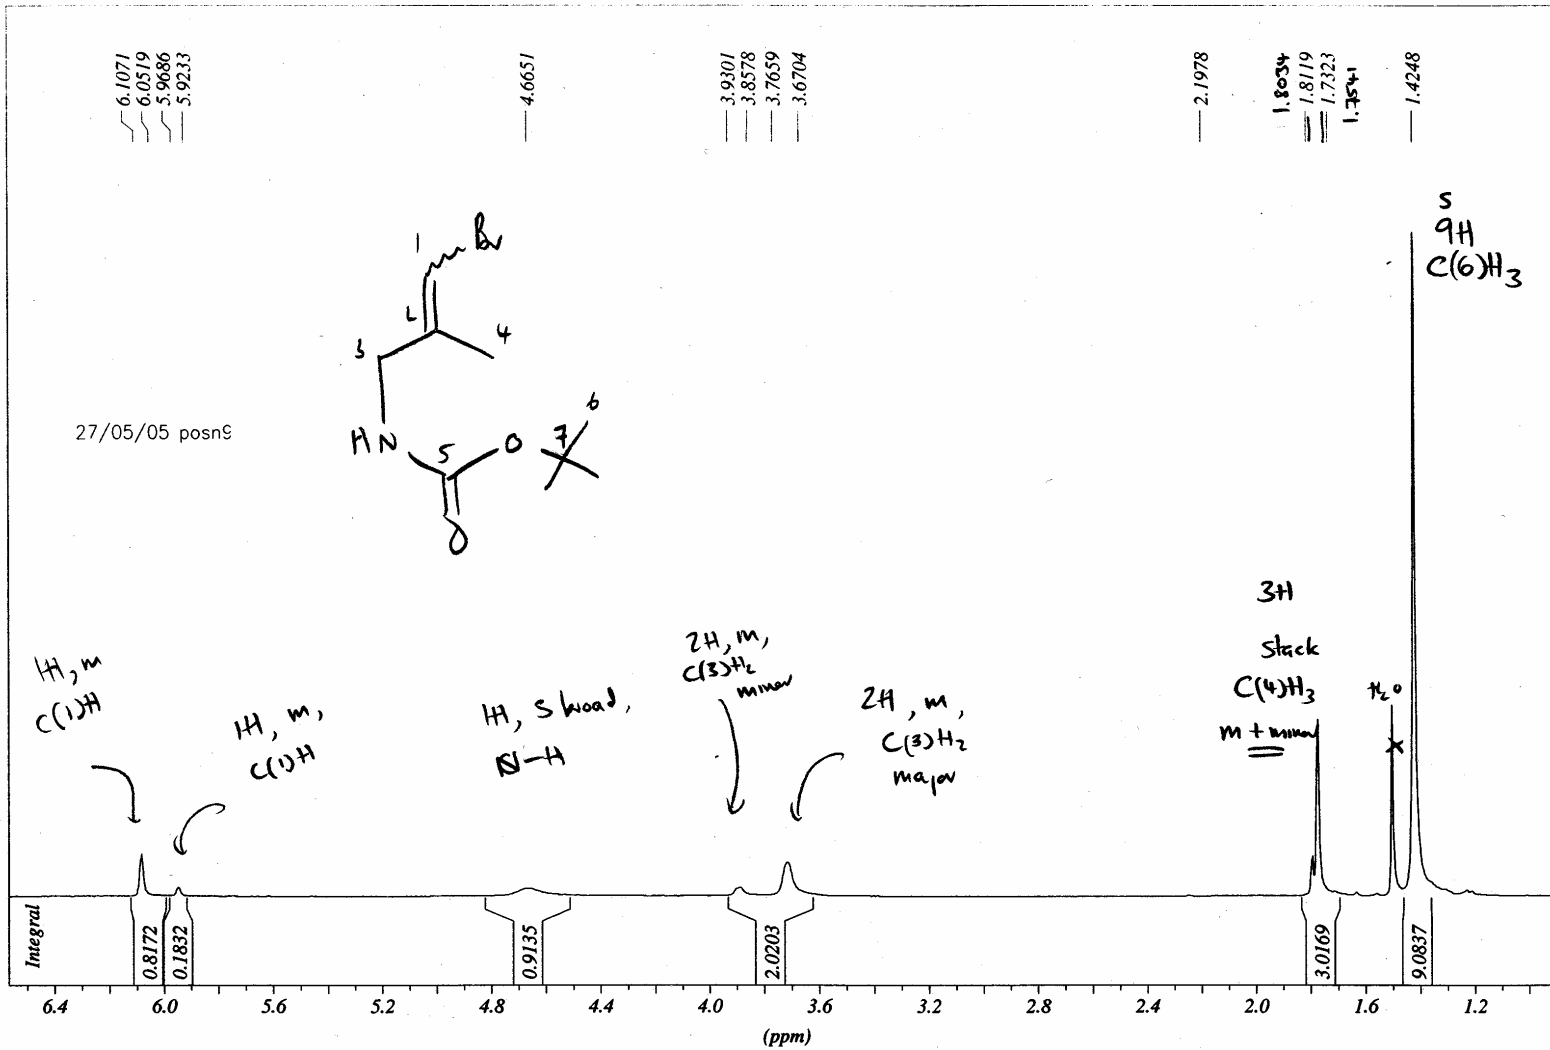

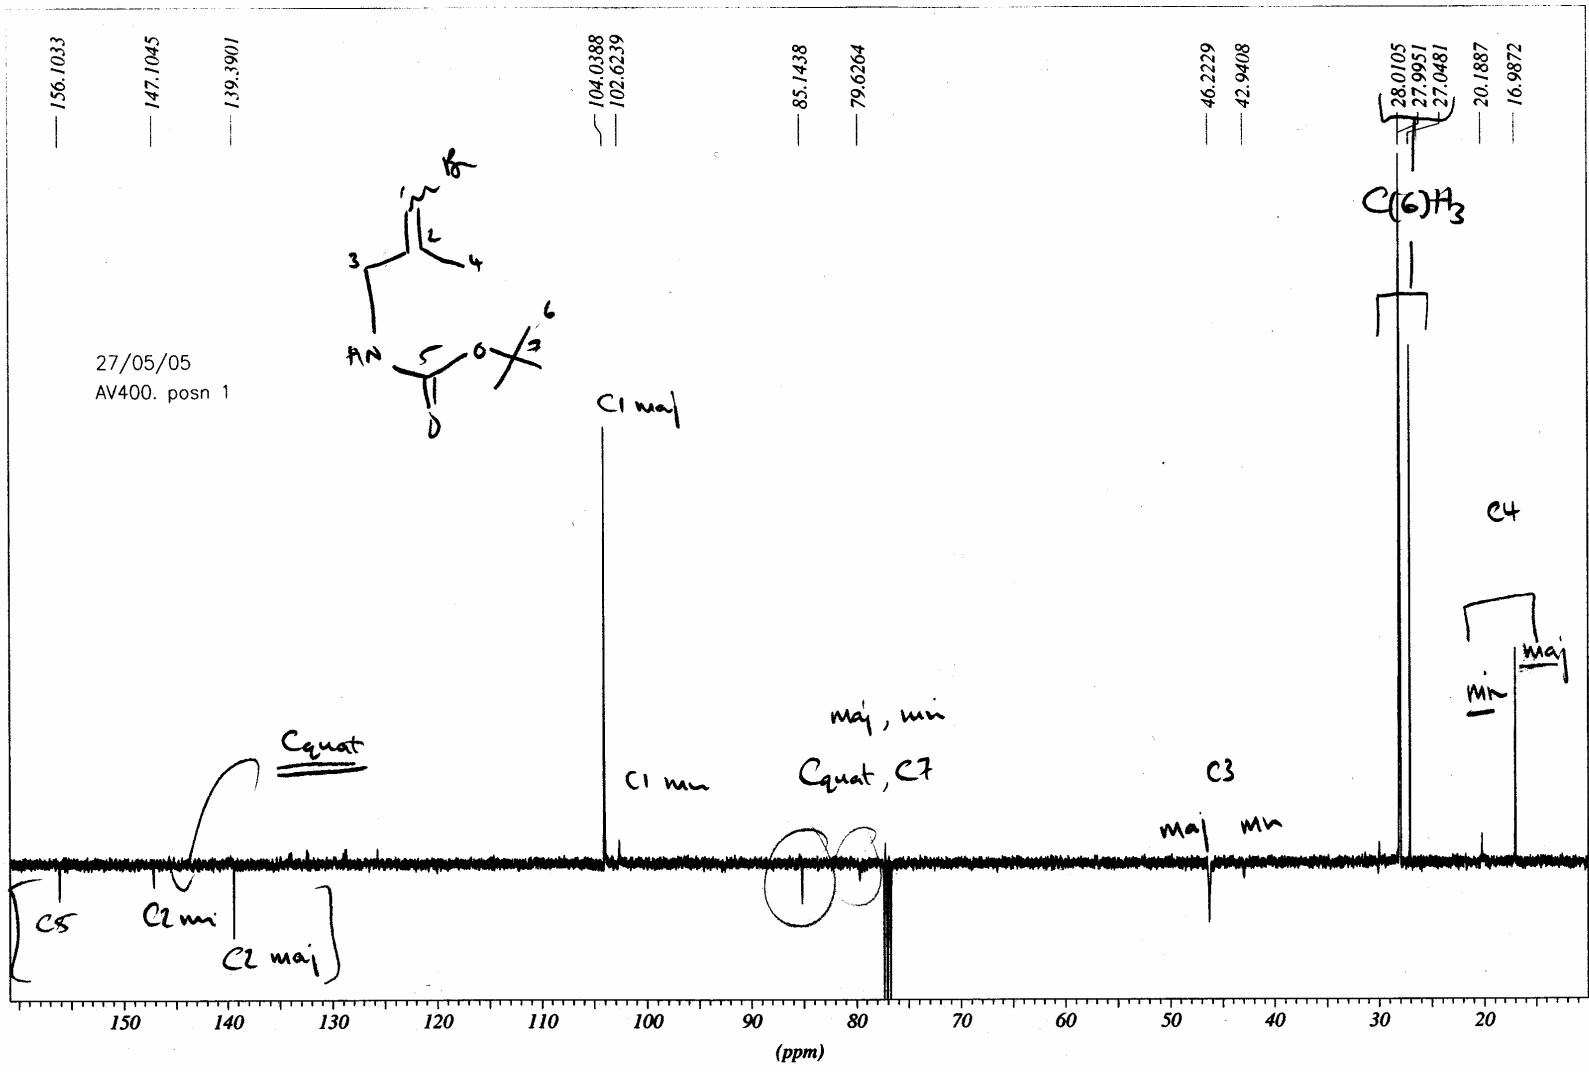

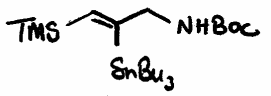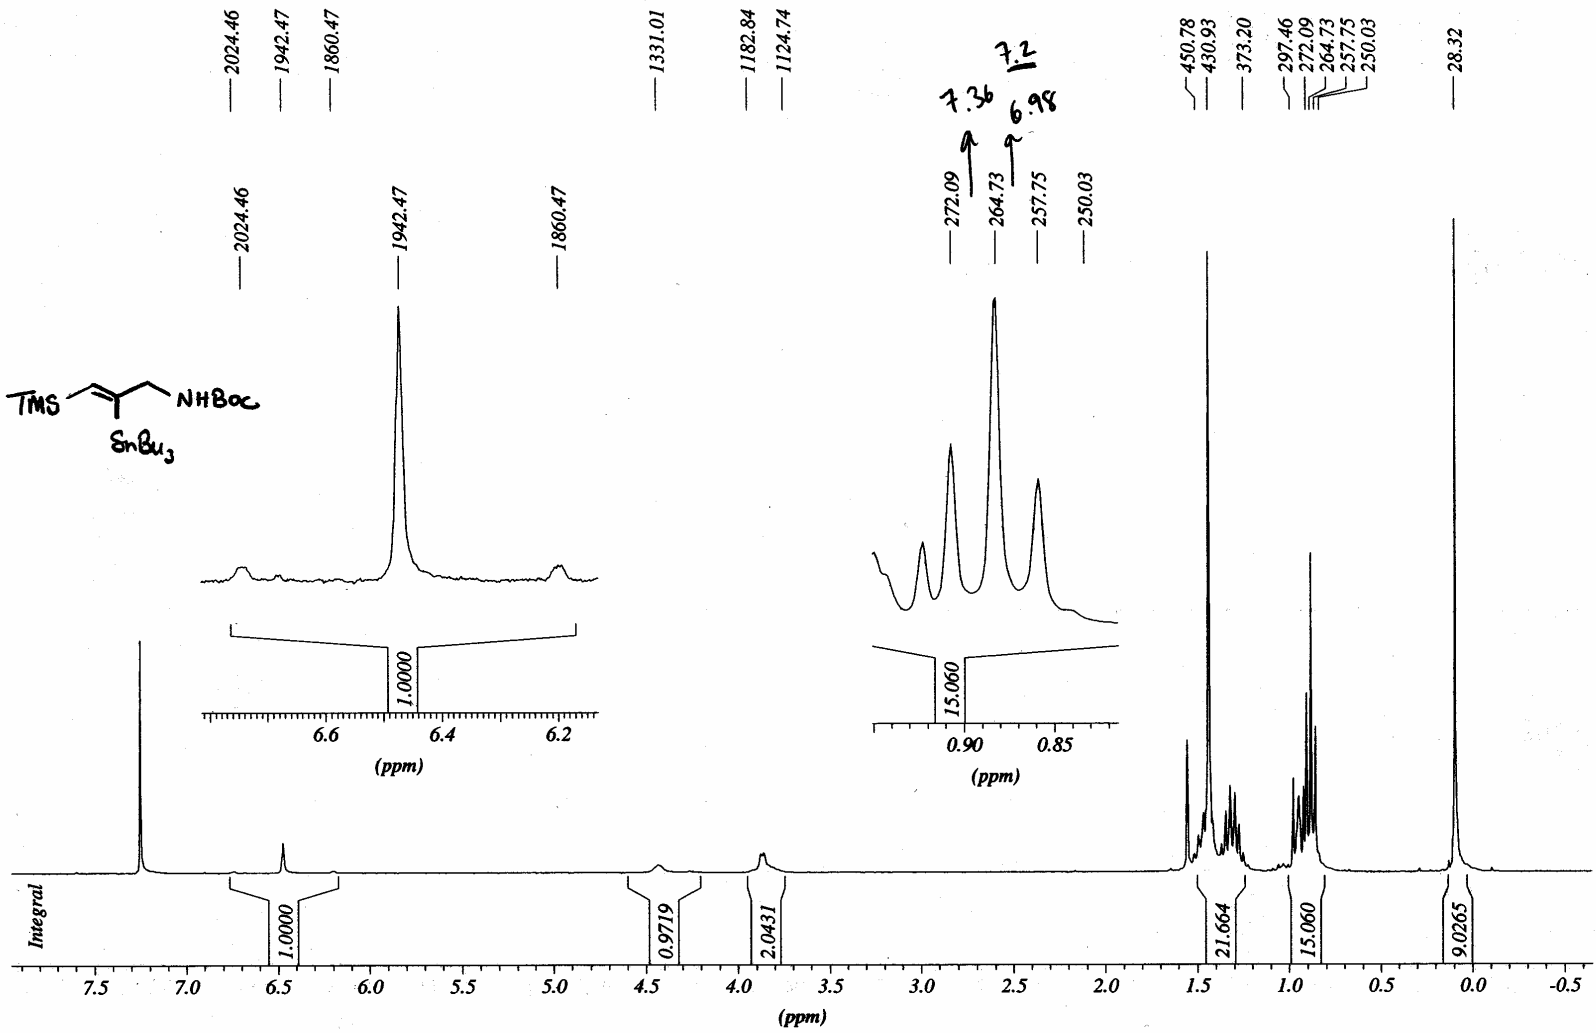

160.3683  
155.3246  
142.9496

16/9/05  
pos 2  
AV300

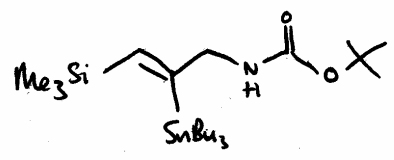

79.0219

54.0166

29.1294  
28.3603  
27.3627

13.6016  
10.8715

0.0880

quat vinyl  
plus C=O

quat Boc

CH<sub>2</sub>N

3 2

1

1 2 3  
Si(CH<sub>3</sub>)<sub>3</sub>

CH vinyl

Si(CH<sub>3</sub>)<sub>3</sub>

CH<sub>3</sub> Boc

Si(CH<sub>3</sub>)<sub>3</sub>

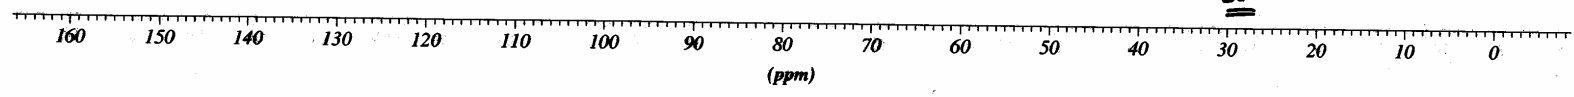

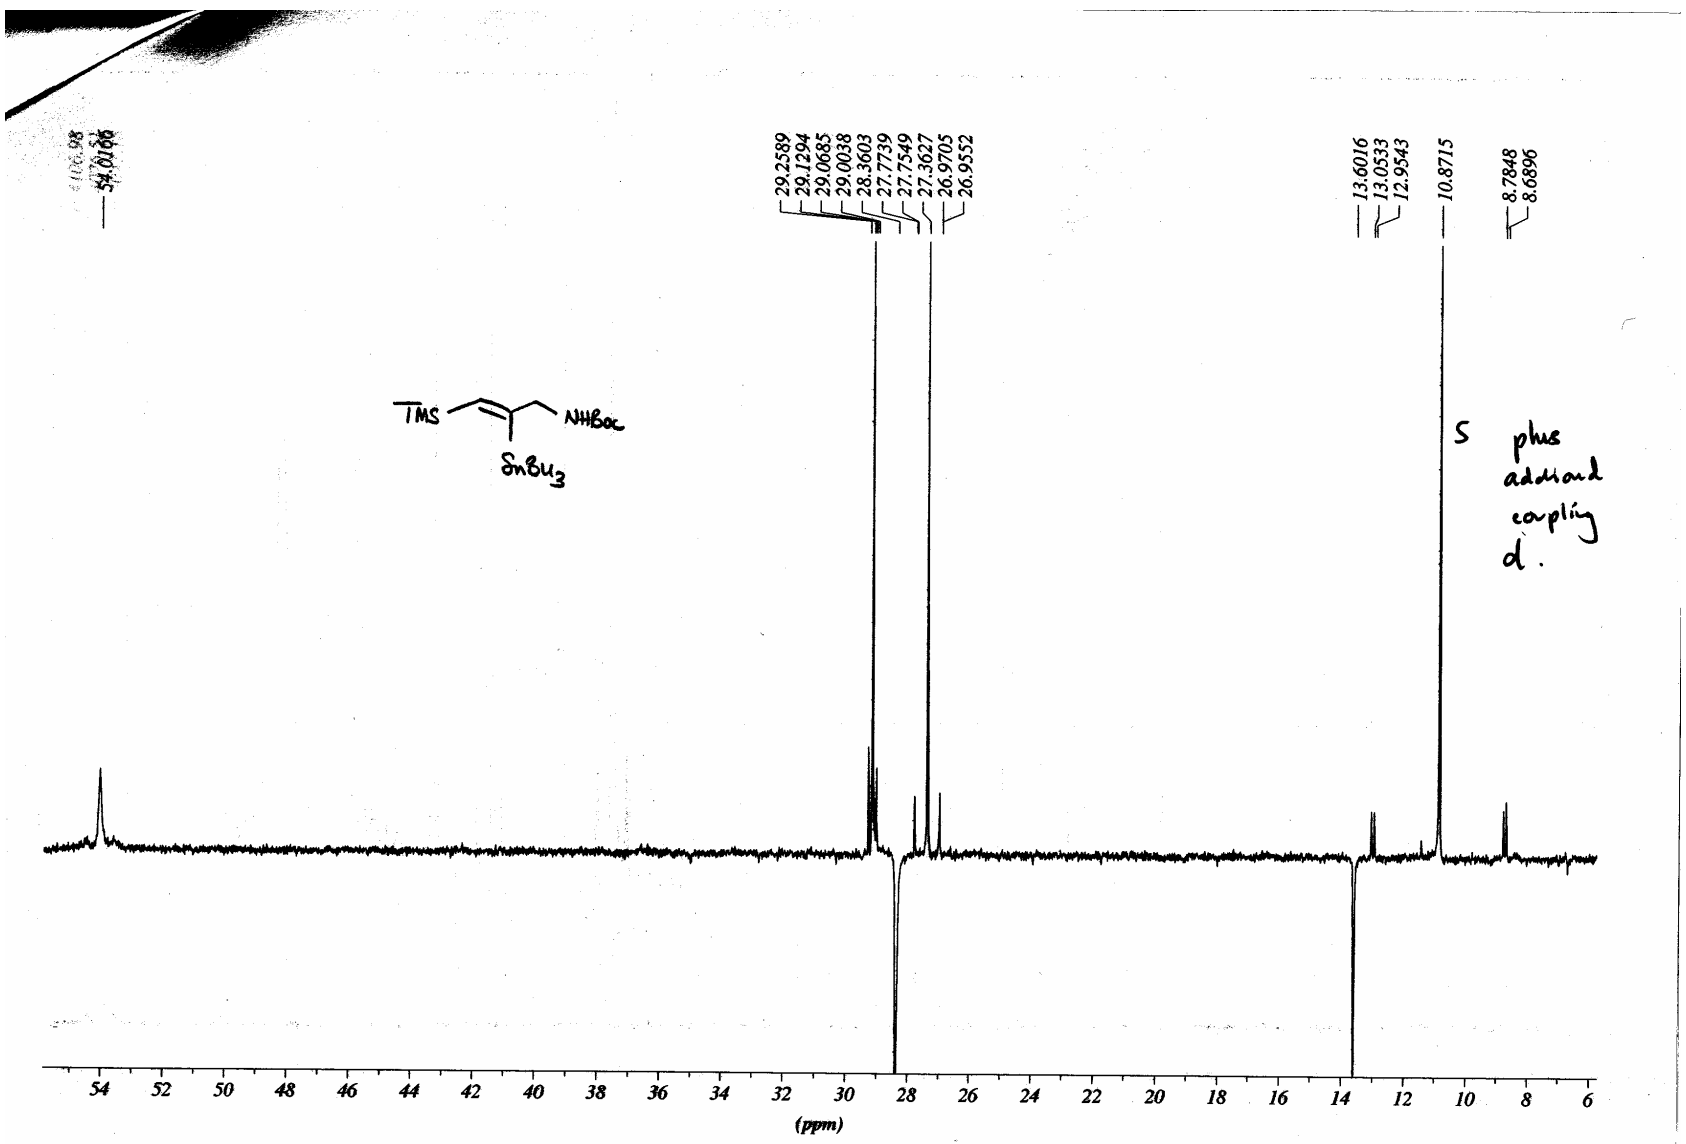

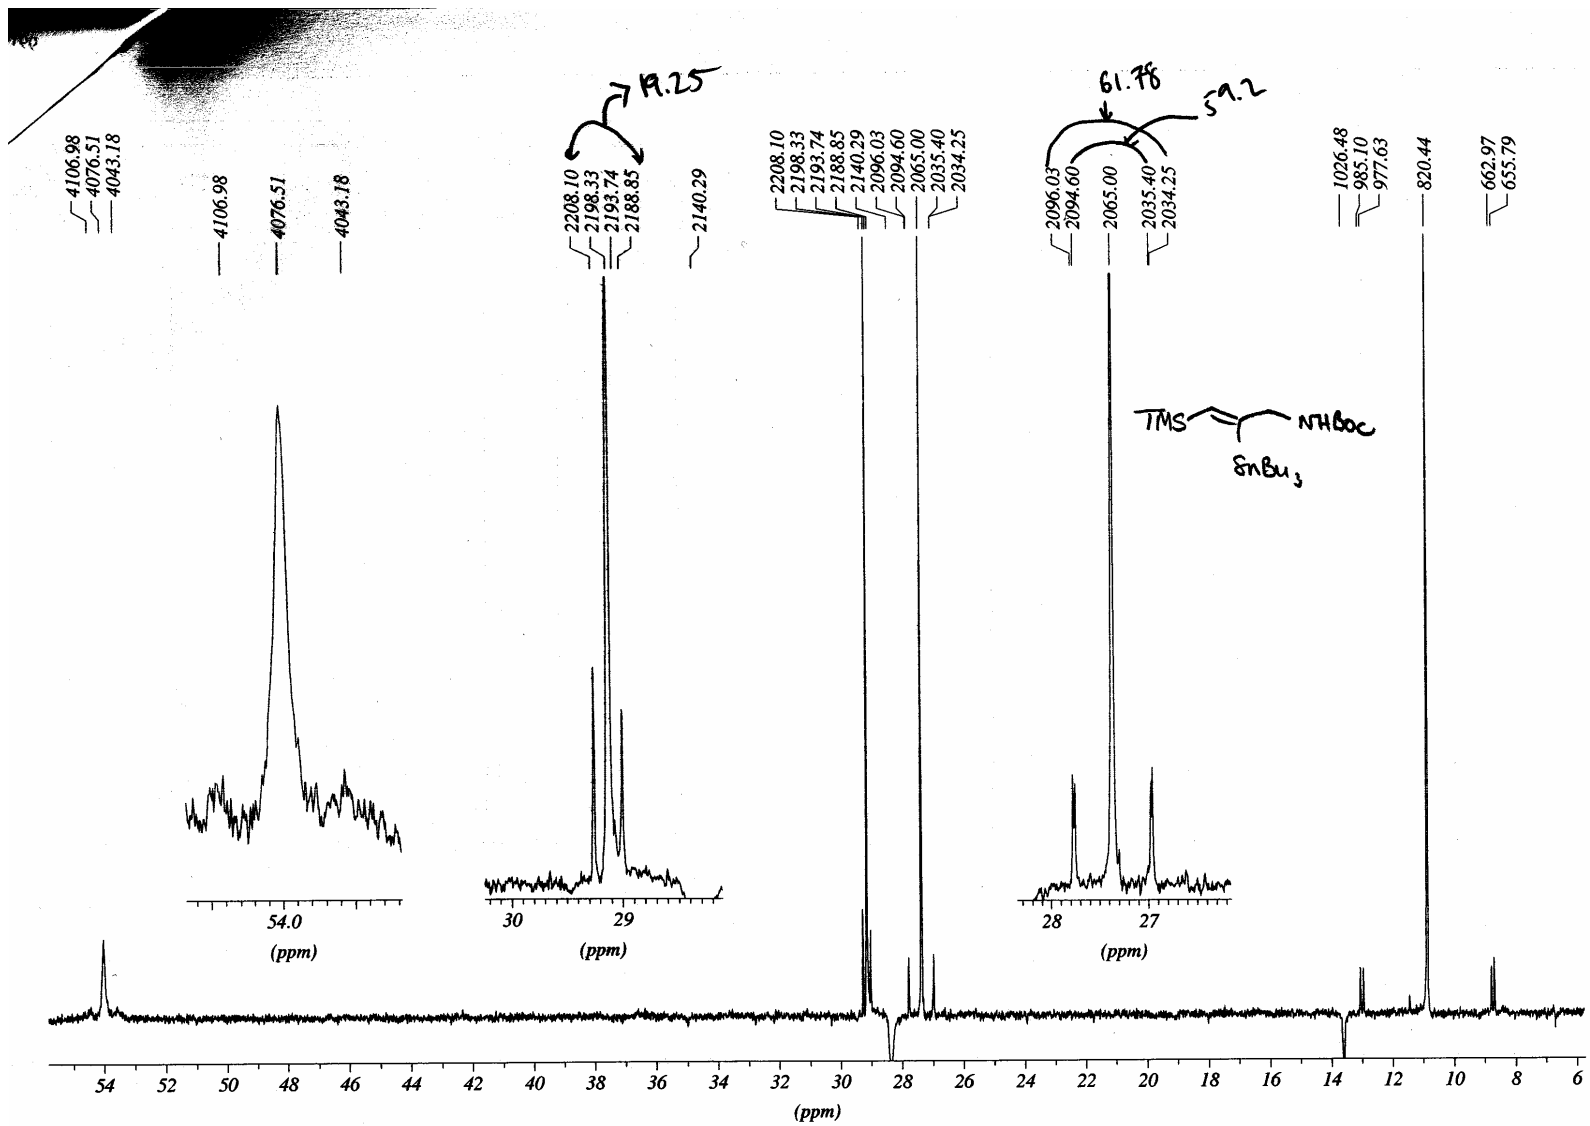

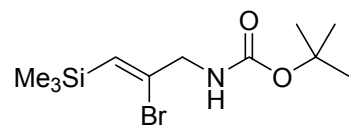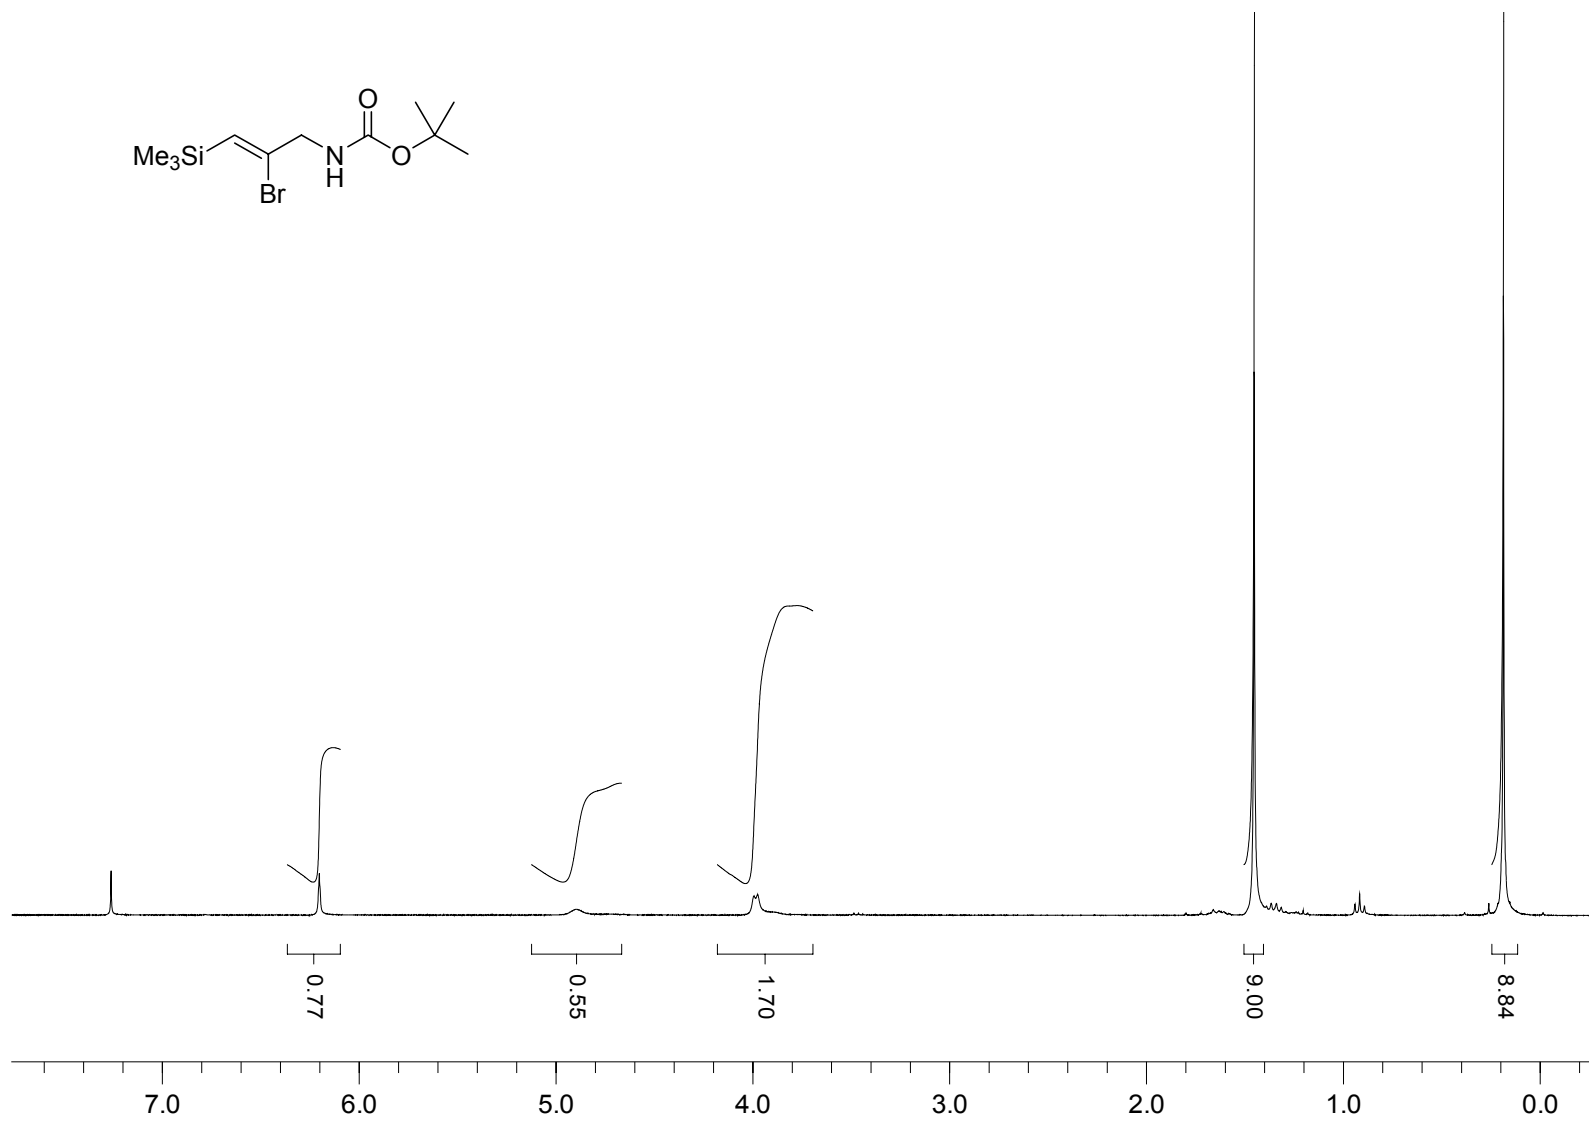

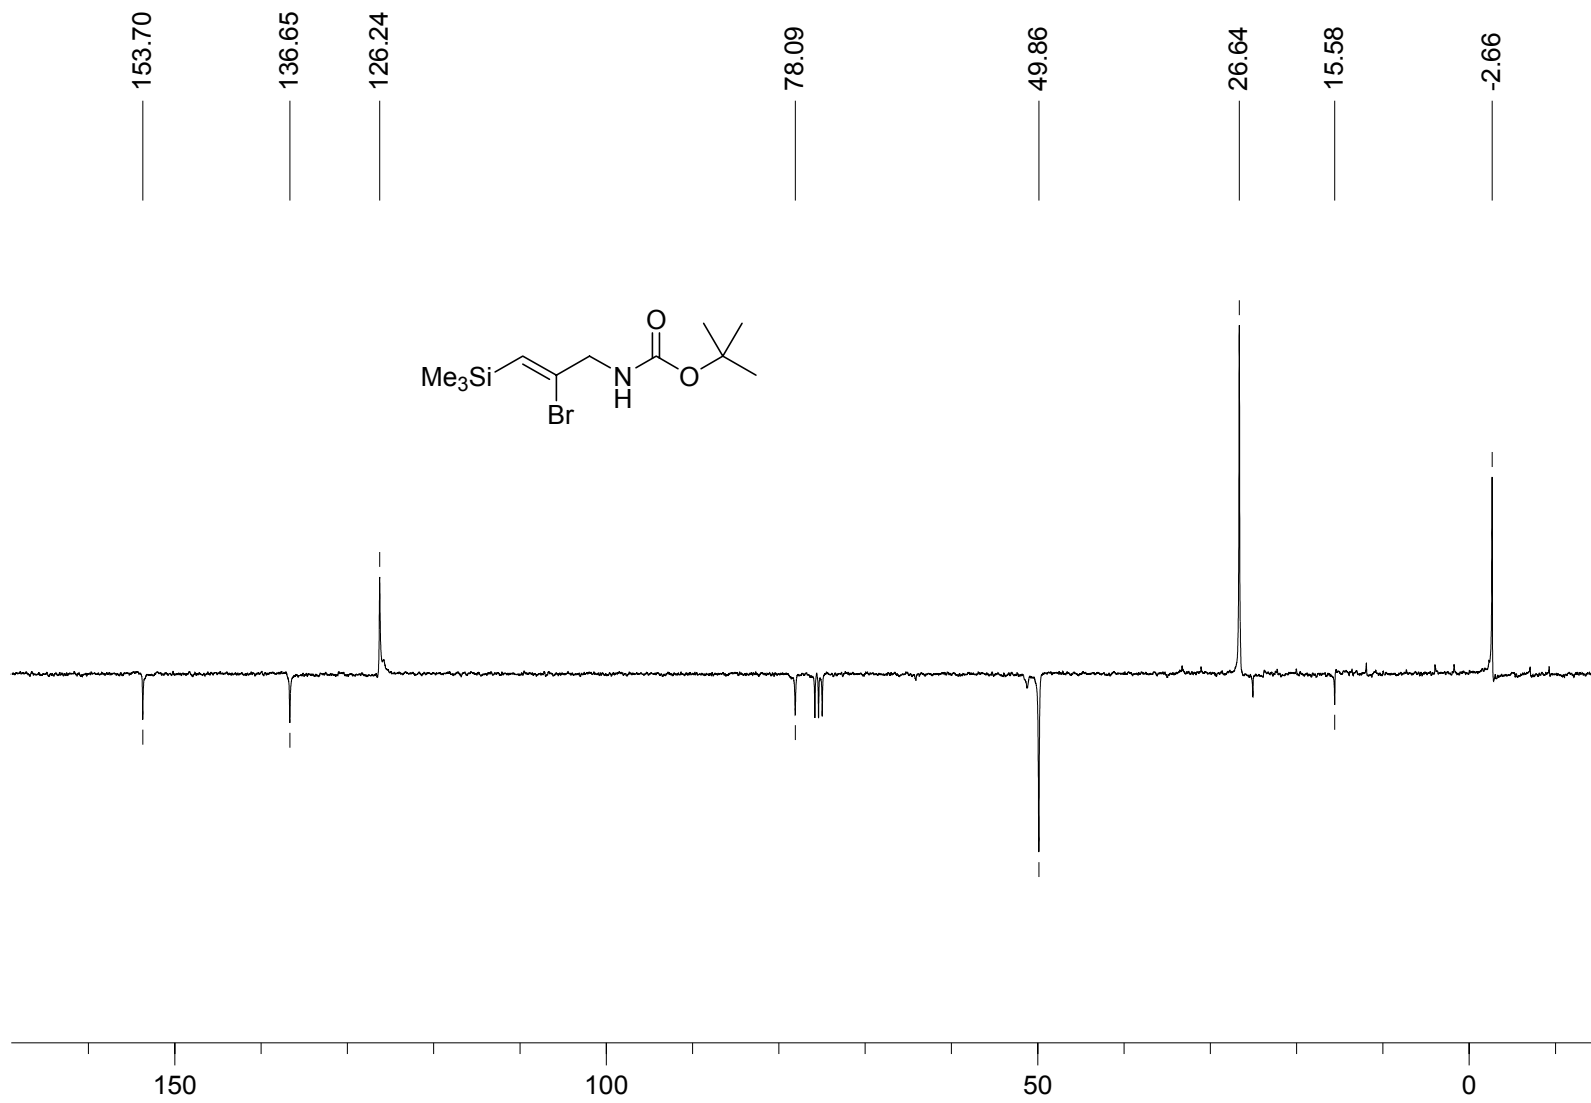

Supplement: b710898b_2.pdf [file b710898b_2.pdf]
