# Supplementary material for: Stereoselective synthesis of 2-dienyl-substituted piperidines using an η4-dienetricarbonyliron complex as the stereocontrolling element in a double reductive amination cascade
Source: Royal Society of Chemistry journal article supplement (doi:10.1039/b710898b), 2007-01-01
Supplement: b710898b_1.pdf [file b710898b_1.pdf]

# Stereoselective Synthesis of 2-Dienyl-Substituted Piperidines using an $\eta^4$ -Dienetricarbonyliron Complex as the Stereocontrolling Element in a Double Reductive Amination Cascade

Iwan Williams,<sup>a</sup> Keith Reeves,<sup>b</sup> Benson M. Kariuki<sup>a</sup> and Liam R. Cox<sup>a\*</sup>

## Experimental Section

All reactions were carried out with magnetic stirring using oven- or flame-dried glassware and under an anhydrous N<sub>2</sub> atmosphere, unless stated otherwise. Solvents were degassed where stated: small volumes (<10 mL) were degassed using the 'freeze and thaw' technique (-196 °C to 25 °C, 3 cycles); larger volumes (>10 mL) were degassed by vigorously stirring the solution and alternating between high vacuum (approx. 1 mbar) and purging with N<sub>2</sub> (five cycles), or by purging the solvent with N<sub>2</sub> whilst simultaneously subjecting the solvent to sonication (15 min) using a Clifton Ultrasonic Bath. Analytical TLC was carried out on Merck 60 Å F<sub>254</sub>, or Whatman 60 Å 0.25 mm pre-coated glass-backed silica gel plates, and visualised using UV light (254/365 nm) and KMnO<sub>4</sub> solution or ammonium molybdate(IV)/cerium(IV) sulfate solution staining dip. Column chromatography was performed under gravity or with gentle pressure applied using hand bellows, using Fluka 60 or FluoroChem 60 silica gel (40-60 µm mesh) and laboratory grade solvents. Removal of volatiles was carried out at 40 °C under reduced pressure (50 - 600 mbar) and residual traces of solvent were removed at rt under high vacuum (approx. 1 mbar).

Weinreb amide **10**,<sup>1</sup> 4-(*tert*-butyldimethylsilyloxy)-1-chlorobutane,<sup>2</sup> and THP ethers, **16a**<sup>3</sup> and **16b**,<sup>3</sup> were prepared according to literature procedures. All solvents were distilled under a N<sub>2</sub> atmosphere. THF and Et<sub>2</sub>O were freshly distilled from sodium benzophenone ketyl. CH<sub>2</sub>Cl<sub>2</sub> was freshly distilled from CaH<sub>2</sub>. Benzene was distilled from CaH<sub>2</sub> and stored over 4 Å MS. DMSO was dried over MgSO<sub>4</sub> overnight and then distilled under reduced pressure and stored over 4 Å MS. Et<sub>3</sub>N was distilled from KOH pellets and stored over 4 Å MS. All other chemicals were obtained from commercial sources and used

without further purification, unless stated otherwise. All solutions used in work-up procedures were aqueous and saturated, unless stated otherwise. Molecular sieves (MS) were activated by heating with a Bunsen burner under high vacuum (approx. 1 mbar) for 15 min and then allowed to cool to rt before using immediately. *Hazard:* In the synthesis of tricarbonyliron complexes,  $[\text{Fe}_2(\text{CO})_9]$  was used as the  $\text{Fe}(\text{CO})_3$  source, and  $[\text{Fe}(\text{CO})_5]$  is a by-product from the reaction. Both of these reagents are extremely toxic. All work involving the handling of these species was carried out in a well ventilated hood. All glassware was treated with bleach to destroy any iron carbonyl residues before re-use.

Elemental analyses were recorded on a Carlo Erba EA1110 simultaneous CHNS analyser. Melting points were determined using open glass capillaries on a Stuart Scientific SMP1 apparatus and are uncorrected. IR spectra were recorded either neat, as thin films, as a  $\text{CH}_2\text{Cl}_2$  film or as a Nujol mull between NaCl plates on a Perkin Elmer 1600 series FTIR or a Perkin Elmer FTIR Paragon 1000 spectrometer.  $^1\text{H}$ -NMR spectra were recorded at rt on a Bruker AC-300 (300 MHz), a Bruker AV-300 (300 MHz), a Bruker AMX-400 (400 MHz), or a Bruker DRX-500 (500 MHz) spectrometer. The term 'stack' is used to describe a region of the spectrum where resonances arising from non-equivalent nuclei overlap and the corresponding coupling constants associated with the overlapping resonances cannot be accurately determined. The term 'multiplet' or m, is used to describe a region of the spectrum where resonances arising from a single nucleus (or equivalent nuclei) overlap, but where coupling constants cannot be accurately determined.  $^{13}\text{C}$ -NMR spectra were recorded at rt on a Bruker AC-300 (75 MHz), a Bruker AV-300 (75 MHz), a Bruker AMX-400 (100 MHz), or a Bruker DRX-500 (125 MHz) spectrometer. Note that the resonances corresponding to the  $\text{Fe}(\text{CO})_3$  group in  $^{13}\text{C}$ -NMR spectra are often of very low intensity, and in most cases were not visible. Mass spectra were recorded on a Micromass LCT spectrometer utilising electrospray (ES) ionisation (and a MeOH mobile phase), or on a VG ProSpec mass spectrometer utilising electron impact (EI) ionisation, and are reported as ( $m/z$  (%)). HRMS were recorded on a Micromass LCT spectrometer using a lock mass incorporated into the mobile phase. Single crystal data for

compounds (**E**)-**7af** and **15** were recorded at rt by Dr Benson Kariuki, at the University of Birmingham, on a Bruker Smart 6000 diffractometer equipped with a CCD detector and a Cu tube source. Structures were solved and refined using SHELXL.<sup>4</sup> Non-hydrogen atoms were refined anisotropically and a riding model was used for C-H hydrogen atoms.

**[(2Z, 1S\*, 4S\*)-1-(N-Methylaminocarbonyl)-(1,2,3,4-η)-penta-2-en-1,4-diyl]tricarbonyliron 15.** Mg turnings (114 mg, 4.70 mmol) and 1,2-dibromoethane (12 μL, 0.14 mmol) were added to a stirred solution of 4-(*tert*-butyldimethylsilyloxy)-1-chlorobutane (630 mg, 2.82 mmol) in THF (30 mL) at 75 °C. The reaction mixture was stirred at this temperature for 27 h, allowed to cool to rt, and subsequently added *via* cannula over 2 min to a stirred solution of Weinreb amide **10** (400 mg, 1.36 mmol) in THF (20 mL) at 0 °C. The reaction mixture was allowed to warm to rt and stirred for a further 36 h and then partitioned between NH<sub>4</sub>Cl solution (30 mL) and Et<sub>2</sub>O (30 mL). The aqueous phase was extracted with Et<sub>2</sub>O (3 x 30 mL). The combined organic phases were washed with brine (50 mL) and dried (MgSO<sub>4</sub>). Removal of the solvent under reduced pressure and purification of the residue by SiO<sub>2</sub> column chromatography (hexane/Et<sub>2</sub>O, 1:1 gradient Et<sub>2</sub>O) yielded, in order of elution, unreacted Weinreb amide **10** (219 mg, 55%), and then amide **15** (133 mg, 37%) as a yellow, crystalline solid; *R*<sub>f</sub> (Et<sub>2</sub>O) 0.26;  $\nu_{\max}$ (CH<sub>2</sub>Cl<sub>2</sub> film)/cm<sup>-1</sup> 3290s br (N-H), 3060m, 2946m, 2050s (CO), 1974s br (CO), 1633s (C=O), 1556s, 1498m, 1467m, 1445m, 1412s, 1381m, 1349s, 1309m, 1266m, 1233s, 1177m, 1160m;  $\delta_{\text{H}}$ (300 MHz; CDCl<sub>3</sub> – D<sub>2</sub>O shake) 0.80 (1H, d, *J* 7.7, C(1)*H*), 1.22-1.32 (1H, m, C(4)*H*), 1.43 (3H, d, *J* 5.9, C(5)*H*<sub>3</sub>), 2.78 (3H, s, NCH<sub>3</sub>), 5.18 (1H, dd, *J* 8.5, 5.2, C(3)*H*), 5.81 (1H, dd, *J* 7.7, 5.2, C(2)*H*);  $\delta_{\text{C}}$ (75 MHz; CDCl<sub>3</sub>) 19.0 (CH<sub>3</sub>, C5), 26.5 (CH<sub>3</sub>, NCH<sub>3</sub>), [49.9, 58.3 (2 x CH, C1, C4)], [82.3, 87.4 (2 x CH, C2, C3)], 171.2 (C<sub>quat</sub>, C=O); *m/z* (ES) 288.1 [(M + Na)<sup>+</sup>, 100%], 260.1 (7, M - CO + Na) [Found [M + Na]<sup>+</sup> 287.9925. C<sub>10</sub>H<sub>11</sub>FeNNaO<sub>4</sub> requires *M* + Na, 287.9935].

**(2E, 4E)-6-Hydroxy-10-tetrahydropyranyloxydeca-2,4-diene 17a.** A refluxing suspension of Mg turnings (130 mg, 5.20 mmol) in THF (1.5 mL) was treated with a few drops of a solution of chloride **16a** (0.50 g, 2.60 mmol) in THF (4 mL). 1,2-Dibromoethane (5 drops) was added and the remaining solution of chloride **16a** in THF was added dropwise over 2 min. The reaction mixture was stirred at reflux for 1 h and then cooled to 0 °C before a solution of sorbaldehyde (140 μL, 1.30 mmol, ~95:5 mixture of (*E, E*)/(*Z, E*)-stereoisomers) in THF (5 mL) was added over 2 min. The reaction mixture was allowed to warm to rt and stirred for 16 h and then partitioned between NH<sub>4</sub>Cl solution (20 mL) and Et<sub>2</sub>O (20 mL). The aqueous phase was extracted with Et<sub>2</sub>O (2 x 20 mL). The combined organic phases were washed with brine (20 mL) and dried (MgSO<sub>4</sub>). Removal of the solvent under reduced pressure yielded an oily yellow residue which was purified by SiO<sub>2</sub> column chromatography (hexane/Et<sub>2</sub>O, gradient 3:1 to 1:1) to yield alcohol **17a** as a pale yellow oil (320 mg, 98%, containing ~5% of the (*Z, E*)-diene); *R*<sub>f</sub> (hexane/Et<sub>2</sub>O, 1:1) 0.26; (Found: C, 70.77; H, 10.26. C<sub>15</sub>H<sub>26</sub>O<sub>3</sub> requires C, 70.83; H, 10.30%);  $\nu_{\max}(\text{film})/\text{cm}^{-1}$  3420s br (OH), 2940s, 2867s, 1453m, 1441m, 1353m, 1201m, 1138s, 1120s, 1077s, 1024s, 989s;  $\delta_{\text{H}}(300 \text{ MHz}; \text{CDCl}_3)$  1.37-1.85 (15H, stack, including [1.74 (3H, d, *J* 6.3, C(1)H<sub>3</sub>)], C(7)H<sub>2</sub>, C(8)H<sub>2</sub>, C(9)H<sub>2</sub>, C(12)H<sub>2</sub>, C(13)H<sub>2</sub>, C(14)H<sub>2</sub>, C(1)H<sub>3</sub>), 3.32-3.42 (1H, stack, C(10)H or C(15)H), 3.44-3.52 (1H, stack, C(10)H or C(15)H), 3.68-3.77 (1H, stack, C(15)H or C(10)H), 3.80-3.90 (1H, stack, C(15)H or C(10)H), 4.11 (1H, apparent q, *J* 6.6, C(6)H), 4.52-4.59 (1H, stack, C(11)H), 5.54 (1H, dd, *J* 15.1, 7.0, =CH), 5.69 (1H, dd, *J* 14.7, 6.2, =CH), 5.94-6.08 (1H, m, =CH), 6.16 (1H, dd, *J* 14.7, 10.3, =CH), resonance for OH not observed; selected data for the (*Z, E*)-stereoisomer: 6.51 (1H, dd, *J* 15.4, 11.0, =CH);  $\delta_{\text{C}}(75 \text{ MHz}; \text{CDCl}_3)$  17.7 (CH<sub>3</sub>, C(1)H<sub>3</sub>), [19.12, 19.14 (CH<sub>2</sub>)], [21.79, 21.83 (CH<sub>2</sub>)], 25.1 (CH<sub>2</sub>), [29.22, 29.25 (CH<sub>2</sub>)], 30.3 (CH<sub>2</sub>), [36.76, 36.78 (CH<sub>2</sub>)], [61.67, 61.69 (CH<sub>2</sub>, C10 or C15)], [67.04, 67.05 (CH<sub>2</sub>, C15 or C10)], [71.91, 71.92 (CH, C6)], 98.3 (CH, C11), 128.8 (CH), 130.0 (CH), 130.7 (CH), [133.39, 133.40 (CH)]; selected data for the (*Z, E*)-stereoisomer: 13.0 (CH<sub>3</sub>, C1), 21.85 (CH<sub>2</sub>), [71.97, 71.99 (CH<sub>2</sub>, C6)], 124.8 (CH), 125.8 (CH), 128.5 (CH), [135.71, 135.73 (CH)]; *m/z*

(ES) 277.3 [(M + Na)<sup>+</sup>, 100%] [Found [M + Na]<sup>+</sup> 277.1786. C<sub>15</sub>H<sub>26</sub>NaO<sub>3</sub> requires M + Na, 277.1780].

**(2E, 4E)-6-Oxo-10-tetrahydropyranyloxydeca-2,4-diene 18a.** MnO<sub>2</sub> (4.80 g, 55 mmol) was added to a stirred solution of allylic alcohol **17a** (0.70 g, 2.75 mmol) in CH<sub>2</sub>Cl<sub>2</sub> (30 mL). The mixture was stirred at rt for 15 h and then filtered through a plug of SiO<sub>2</sub>, washing with Et<sub>2</sub>O (100 mL). Concentration of the filtrate under reduced pressure yielded a yellow oil which was purified by SiO<sub>2</sub> column chromatography (hexane/Et<sub>2</sub>O, 2:1) to yield dienone **18a** as a pale yellow oil (0.65 g, 94%); *R<sub>f</sub>* (hexane/Et<sub>2</sub>O, 1:1) 0.34;  $\nu_{\max}(\text{film})/\text{cm}^{-1}$  2941s, 2870s, 1687s (C=O), 1663 (C=O), 1640s (C=C), 1596s (C=C), 1442m, 1352m, 1323m, 1200m, 1137s, 1120s;  $\delta_{\text{H}}(300 \text{ MHz; CDCl}_3)$  1.43-1.89 (13H, stack, including [1.83 (3H, d, *J* 4.8, C(1)H<sub>3</sub>)], C(8)H<sub>2</sub>, C(9)H<sub>2</sub>, C(12)H<sub>2</sub>, C(13)H<sub>2</sub>, C(14)H<sub>2</sub>, C(1)H<sub>3</sub>), 2.55 (2H, t, *J* 7.2, C(7)H<sub>2</sub>), 3.32-3.41 (1H, stack, C(10)H or C(15)H), 3.42-3.51 (1H, stack, C(10)H or C(15)H), 3.68-3.77 (1H, stack, C(15)H or C(10)H), 3.78-3.87 (1H, stack, C(15)H or C(10)H), 4.51-4.57 (1H, m, C(11)H), 6.03 (1H, d, *J* 15.5, =CH), 6.09-6.23 (2H, stack, 2 x =CH), 7.02-7.16 (1H, stack, =CH); selected data for the (*Z*, *E*)-stereoisomer: 7.49 (1H, dd, *J* 15.4, 11.0, =CH);  $\delta_{\text{C}}(75 \text{ MHz; CDCl}_3)$  18.5 (CH<sub>3</sub>, C1), 19.4 (CH<sub>2</sub>), 21.0 (CH<sub>2</sub>), 25.3 (CH<sub>2</sub>), 29.1 (CH<sub>2</sub>), 30.5 (CH<sub>2</sub>), 39.9 (CH<sub>2</sub>, C7), [62.0, 66.9 (2 x CH<sub>2</sub>, C10, C15)], 98.5 (CH, C11), 127.4 (CH, =CH), 130.1 (CH, =CH), 139.8 (CH, =CH), 142.4 (CH, =CH), 200.3 (C<sub>quat</sub>, C=O); selected data for the (*Z*, *E*)-stereoisomer: 13.9 (CH<sub>3</sub>, C1), 20.9 (CH<sub>2</sub>), 40.4 (CH<sub>2</sub>, C7), 66.7 (CH<sub>2</sub>, C10 or C15), 98.6 (CH, C11), 127.6 (CH, =CH), 129.1 (CH, =CH), 136.3 (CH, =CH); *m/z* (ES) 275.2 [(M + Na)<sup>+</sup>, 100%] [Found [M + Na]<sup>+</sup> 275.1619. C<sub>15</sub>H<sub>24</sub>NaO<sub>3</sub> requires M + Na, 275.1623].

**[(3Z, 2S\*, 5S\*)-6-Oxo-10-tetrahydropyranyloxy-(2,3,4,5-η)-dec-3-en-2,5-diyl]tricarbonyliron 19a.** A solution of dienone **18a** (0.66 g, 2.62 mmol) in degassed Et<sub>2</sub>O (5 mL) was added to a stirred suspension of [Fe<sub>2</sub>(CO)<sub>9</sub>] (1.90 g, 5.23 mmol) in degassed Et<sub>2</sub>O (25 mL). The mixture was heated at 40 °C for 42 h in the absence of light and then filtered through a short plug of SiO<sub>2</sub>. The filtrate was concentrated under reduced pressure to give a dark brown

residue which was purified by SiO<sub>2</sub> column chromatography (hexane/Et<sub>2</sub>O, gradient 8:1 to 4:1 to 2:1) to yield iron complex **19a** as an orange oil (0.71 g, 69%); *R<sub>f</sub>* (hexane/Et<sub>2</sub>O, 1:1) 0.31; (Found: C, 55.37; H, 6.16. C<sub>18</sub>H<sub>24</sub>FeO<sub>6</sub> requires C, 55.12; H, 6.17%);  $\nu_{\max}(\text{film})/\text{cm}^{-1}$  2944s, 2870m, 2051s (CO), 1980s br (CO), 1676s (C=O), 1460m, 1441m, 1352m, 1201m, 1174m, 1137s, 1120s, 1033s;  $\delta_{\text{H}}(300 \text{ MHz}; \text{CDCl}_3)$  1.21 (1H, d, *J* 8.1, C(5)*H*), 1.38-1.87 (14H, stack, C(1)*H*<sub>3</sub>, C(2)*H*, C(8)*H*<sub>2</sub>, C(9)*H*<sub>2</sub>, C(12)*H*<sub>2</sub>, C(13)*H*<sub>2</sub>, C(14)*H*<sub>2</sub>), 2.30-2.47 (2H, m, C(7)*H*<sub>2</sub>), 3.32-3.42 (1H, m, C(10)*H* or C(15)*H*), 3.43-3.53 (1H, m, C(15)*H* or C(10)*H*), 3.68-3.78 (1H, m, C(10)*H* or C(15)*H*), 3.79-3.89 (1H, m, C(15)*H* or C(10)*H*), 4.49-4.59 (1H, m, C(11)*H*), 5.22 (1H, dd, *J* 8.1, 5.2, C(3)*H*), 5.77 (1H, dd, *J* 8.1, 5.2, C(4)*H*);  $\delta_{\text{C}}(100 \text{ MHz}; \text{CDCl}_3)$  18.7 (CH<sub>3</sub>, C1), [19.1, 21.0, 25.1, 28.9, 30.3 (5 x CH<sub>2</sub>, C8, C9, C12, C13, C14), [42.01, 42.04 (2 x CH<sub>2</sub>, C7)], [53.3, 59.0 (2 x CH, C2, C5)], [62.0, 66.90, 66.92 (2 x CH<sub>2</sub>, C15, C10)], [81.3, 88.6 (2 x CH, C3, C4), 98.8 (CH, C11), 206.0 (C<sub>quat</sub>, C=O)]; *m/z* (ES) 415.2 [(*M* + Na)<sup>+</sup>, 100%], 387.2 (12, *M* + Na – CO), 359.2 (31, *M* + Na – 2CO) [Found [*M* + Na]<sup>+</sup> 415.0809. C<sub>18</sub>H<sub>24</sub>FeNaO<sub>6</sub> requires *M* + Na, 415.0820].

**[(3Z, 2S\*, 5S\*)-10-Hydroxy-6-oxo-(2,3,4,5-η)-dec-3-en-2,5-diyl]tricarbonyliron.** *p*PTS (133 mg, 0.53 mmol) was added to a solution of THP-ether **19a** (516 mg, 1.32 mmol) in EtOH (20 mL) at 40 °C. The reaction mixture was heated at 50 °C for 16 h, and then cooled to rt before being partitioned between EtOAc (50 mL) and H<sub>2</sub>O (50 mL). The aqueous phase was extracted with EtOAc (2 x 50 mL) and the combined organic phases were washed with brine (100 mL) and dried (MgSO<sub>4</sub>). Concentration under reduced pressure yielded a yellow residue which was purified by SiO<sub>2</sub> column chromatography (hexane/Et<sub>2</sub>O, 1:1) to provide the corresponding keto-alcohol as an orange oil (350 mg, 86%); *R<sub>f</sub>* (Et<sub>2</sub>O) 0.28;  $\nu_{\max}(\text{film})/\text{cm}^{-1}$  3419s br (OH), 2942s, 2870m, 2052s (CO), 1980s br (CO), 1671s (C=O), 1460s, 1440s, 1380m, 1174m, 1062m, 1032s;  $\delta_{\text{H}}(300 \text{ MHz}; \text{CDCl}_3)$  1.20 (1H, d, *J* 8.1, C(5)*H*), 1.42-1.69 (8H, stack, including [1.46 (3H, d, *J* 5.9, C(1)*H*<sub>3</sub>]), C(2)*H*, C(8)*H*<sub>2</sub>, C(9)*H*<sub>2</sub>, C(1)*H*<sub>3</sub>), 1.85 (1H, s, OH), 2.34-2.46 (2H, m, C(7)*H*<sub>2</sub>), 3.61 (2H, t, *J* 6.1, C(10)*H*<sub>2</sub>), 5.23 (1H, dd, *J* 8.5, 5.2, C(3)*H*), 5.77 (1H, dd, *J* 8.1,

5.2, C(4)*H*);  $\delta_C$ (100 MHz; CDCl<sub>3</sub>) 18.8 (CH<sub>3</sub>, C1), 20.0 (CH<sub>2</sub>, C8), 31.9 (CH<sub>2</sub>, C9), 41.8 (CH<sub>2</sub>, C7), [53.2, 59.2 (2 x CH, C2, C5)], 62.1 (CH<sub>2</sub>, C10), [81.3, 88.7 (2 x CH, C3, C4)], 206.4 (C<sub>quat</sub>, C=O); *m/z* (ES) 331.0 [(M + Na)<sup>+</sup>, 100%], 303.0 (28, M + Na - CO), 275.0 (84, M + Na - 2CO) [Found [M + Na]<sup>+</sup> 331.0246. C<sub>13</sub>H<sub>16</sub>FeNaO<sub>5</sub> requires M + Na, 331.0245].

**[(3Z, 2S\*, 5S\*)-6,10-Dioxo-(2,3,4,5- $\eta$ )-dec-3-en-2,5-diyl]tricarbonyliron 8a.**

A solution of DMSO (1.15 mL, 16.20 mmol) in CH<sub>2</sub>Cl<sub>2</sub> (20 mL) was added *via* cannula over 5 min to a cold (-78 °C) solution of (COCl)<sub>2</sub> (0.71 mL, 8.11 mmol) in CH<sub>2</sub>Cl<sub>2</sub> (20 mL). The reaction mixture was stirred at -78 °C for 1 h before a solution of [(3Z, 2S\*, 5S\*)-10-hydroxy-6-oxo-(2,3,4,5- $\eta$ )-dec-3-en-2,5-diyl]tricarbonyliron (1.04 g, 3.38 mmol) in CH<sub>2</sub>Cl<sub>2</sub> (20 mL) was added. The reaction mixture was stirred for 1 h at -78 °C, and then Et<sub>3</sub>N (4.71 mL, 33.80 mmol) was added dropwise over 5 min. After 1 h, H<sub>2</sub>O (75 mL) was added at -78 °C and the reaction mixture then allowed to warm to rt. The two phases were separated, the aqueous phase was extracted with CH<sub>2</sub>Cl<sub>2</sub> (3 x 50 mL), and the combined organic phases were dried (MgSO<sub>4</sub>) and then concentrated under reduced pressure. Purification of the residue by SiO<sub>2</sub> column chromatography (hexane/Et<sub>2</sub>O, 3:2) provided keto-aldehyde **8a** as an orange oil (0.80 g, 77%); *R<sub>f</sub>* (Et<sub>2</sub>O) 0.52;  $\nu_{\max}$ (film)/cm<sup>-1</sup> 2950m, 2724w, 2050s (CO), 1977s br (CO), 1723s (C=O), 1674s (C=O), 1494m, 1461m, 1441m, 1380m, 1174m, 1109m, 1033m;  $\delta_H$ (300 MHz; CDCl<sub>3</sub>) 1.19 (1H, d, *J* 8.1, C(5)*H*), 1.43-1.59 (4H, stack, C(1)*H*<sub>3</sub>, C(2)*H*), 1.82-1.96 (2H, m, C(8)*H*<sub>2</sub>), 2.35-2.52 (4H, stack, C(7)*H*<sub>2</sub>, C(9)*H*<sub>2</sub>), 5.24 (1H, dd, *J* 8.5, 5.2, C(3)*H*), 5.78 (1H, dd, *J* 8.1, 5.2, C(4)*H*), 9.75 (1H, s, CHO);  $\delta_C$ (75 MHz; CDCl<sub>3</sub>) 16.7 (CH<sub>2</sub>, C8), 19.1 (CH<sub>3</sub>, C1), [41.0, 42.9 (2 x CH<sub>2</sub>, C7, C9)], [53.3, 59.5 (2 x CH, C2, C5)], [81.1, 88.7 (2 x CH, C3, C4)], 201.7 (CH, CHO), 204.4 (C<sub>quat</sub>, C=O); *m/z* (ES) 329.1 [(M + Na)<sup>+</sup>, 50%], 301.1 (9, M + Na - CO), 277.1 (49), 273.1 (13, M + Na - 2CO), 245.1 (100, M + Na - 3CO) [Found [M + Na]<sup>+</sup> 329.0094. C<sub>13</sub>H<sub>14</sub>FeNaO<sub>5</sub> requires M + Na, 329.0088].

**(2E, 4E)-6-Hydroxy-11-tetrahydropyranyloxyundeca-2,4-diene 17b.** A refluxing suspension of Mg turnings (0.47 g, 19.40 mmol) in THF (5 mL) was treated with a few drops of a solution of chloride **16b** (2.00 g, 9.68 mmol) in THF (15 mL). 1,2-Dibromoethane (5 drops) was added and the remaining solution of chloride **16b** in THF was added dropwise over 2 min. The reaction mixture was stirred at reflux for 1 h and then cooled to 0 °C before a solution of sorbaldehyde (0.96 mL, 8.71 mmol, ~95:5 mixture of (*E, E*)/(*Z, E*)-stereoisomers) in THF (20 mL) was added over 2 min. The reaction mixture was warmed to rt. After 16 h, the reaction mixture was partitioned between NH<sub>4</sub>Cl solution (40 mL) and Et<sub>2</sub>O (40 mL), and the aqueous phase extracted with Et<sub>2</sub>O (2 x 40 mL). The combined organic phases were washed with brine (100 mL) and dried (MgSO<sub>4</sub>). Removal of the solvent under reduced pressure yielded an oily yellow residue which was purified by SiO<sub>2</sub> column chromatography (hexane/Et<sub>2</sub>O, gradient 3:1 to 1:1) to afford alcohol **17b** as a pale yellow oil (2.11 g, 90%, containing ~5% of the (*Z, E*)-diene); *R<sub>f</sub>* (hexane/Et<sub>2</sub>O, 1:1) 0.29; (Found: C, 71.73; H, 10.65. C<sub>16</sub>H<sub>28</sub>O<sub>3</sub> requires C, 71.60; H, 10.52%);  $\nu_{\max}(\text{film})/\text{cm}^{-1}$  3422s br (OH), 2938s, 2859s, 1453m, 1441m, 1353m, 1201m, 1138s, 1120s, 1077s, 1024s, 988s;  $\delta_{\text{H}}(300 \text{ MHz}; \text{CDCl}_3)$  1.28-1.85 (17H, stack, including [1.75 (3H, d, *J* 6.3, C(1)H<sub>3</sub>)], C(7)H<sub>2</sub>, C(8)H<sub>2</sub>, C(9)H<sub>2</sub>, C(10)H<sub>2</sub>, C(13)H<sub>2</sub>, C(14)H<sub>2</sub>, C(15)H<sub>2</sub>, C(1)H<sub>3</sub>), 3.32-3.42 (1H, m, C(11)H<sub>a</sub> or C(16)H<sub>a</sub>), 3.44-3.53 (1H, m, C(16)H<sub>a</sub> or C(11)H<sub>a</sub>), 3.67-3.77 (1H, m, C(11)H<sub>b</sub> or C(16)H<sub>b</sub>), 3.80-3.91 (1H, m, C(16)H<sub>b</sub> or C(11)H<sub>b</sub>), 4.09 (1H, apparent q, *J* 6.6, C(6)H), 4.51-4.59 (1H, m, C(12)H), 5.54 (1H, dd, *J* 14.7, 7.0, =CH), 5.61-5.77 (1H, m, =CH), 5.95-6.21 (2H, stack, 2 x =CH), resonance for OH not observed; selected data for the (*Z, E*)-stereoisomer: 6.50 (1H, dd, *J* 15.1, 11.0, =CH);  $\delta_{\text{C}}(75 \text{ MHz}; \text{CDCl}_3)$  17.7 (CH<sub>3</sub>, C1), [19.17, 19.19, 24.95, 24.98, 25.2, 25.89, 25.93, 29.33, 29.34, 30.4 (6 x CH<sub>2</sub>, C8, C9, C10, C13, C14, C15)], 37.0 (CH<sub>2</sub>, C7), [61.69, 61.72, 67.12, 67.15 (2 x CH<sub>2</sub>, C11, C16)], [72.02, 72.04 (CH, C6)], [98.27, 98.28 (CH, C12)], [128.9, 130.1, 130.7, 133.5 (4 x CH, =CH)], selected data for the (*Z, E*)-stereoisomer: 13.0 (CH<sub>3</sub>, C1), [72.07, 72.09 (CH<sub>2</sub>, C6)], [124.8, 125.9, 128.6, 135.8 (4 x CH, =CH)]; *m/z* (ES) 291.1 [(M + Na)<sup>+</sup>, 100%] [Found [M + Na]<sup>+</sup> 291.1941. C<sub>16</sub>H<sub>28</sub>NaO<sub>3</sub> requires *M* + Na, 291.1936].



**(2E, 4E)-6-Oxo-11-tetrahydropyranyloxyundeca-2,4-diene 18b.** MnO<sub>2</sub> (3.24 g, 37.20 mmol) was added to a stirred solution of alcohol **17b** (0.50 g, 1.86 mmol) in CH<sub>2</sub>Cl<sub>2</sub> (25 mL). The mixture was stirred at rt for 15 h and then filtered through a plug of SiO<sub>2</sub>, washing with Et<sub>2</sub>O (100 mL). Concentration under reduced pressure yielded a yellow oil, which was purified by SiO<sub>2</sub> column chromatography (hexane/Et<sub>2</sub>O, 2:1) to provide dienone **18b** as a pale yellow oil (0.45 g, 91%); *R<sub>f</sub>* (hexane/Et<sub>2</sub>O, 1:1) 0.38; (Found: C, 72.29; H, 10.06. C<sub>16</sub>H<sub>26</sub>O<sub>3</sub> requires C, 72.14; H, 9.84%);  $\nu_{\max}(\text{film})/\text{cm}^{-1}$  2941s, 2870m, 1688m (C=O), 1662s (C=C), 1640s (C=C), 1596s, 1442m, 1352m, 1200m, 1137m, 1120m, 1034s;  $\delta_{\text{H}}(300 \text{ MHz; CDCl}_3)$  1.31-1.92 (15H, stack, including [1.89 (3H, d, *J* 4.8, C(1)H<sub>3</sub>)], C(8)H<sub>2</sub>, C(9)H<sub>2</sub>, C(10)H<sub>2</sub>, C(13)H<sub>2</sub>, C(14)H<sub>2</sub>, C(15)H<sub>2</sub>, C(1)H<sub>3</sub>), 2.54 (2H, t, *J* 7.5, C(7)H<sub>2</sub>), 3.31-3.42 (1H, m, C(11)H<sub>a</sub> or C(16)H<sub>a</sub>), 3.43-3.54 (1H, m, C(16)H<sub>a</sub> or C(11)H<sub>a</sub>), 3.66-3.77 (1H, m, C(11)H<sub>b</sub> or C(16)H<sub>b</sub>), 3.79-3.91 (1H, m, C(16)H<sub>b</sub> or C(11)H<sub>b</sub>), 4.49-4.59 (1H, m, C(12)H), 6.05 (1H, d, *J* 15.1, =CH), 6.10-6.25 (2H, stack, 2 x =CH), 7.04-7.18 (1H, m, =CH); selected data for the (*Z*, *E*)-stereoisomer: 7.50 (1H, dd, *J* 14.7, 11.0, =CH);  $\delta_{\text{C}}(75 \text{ MHz; CDCl}_3)$  18.4 (CH<sub>3</sub>, C1), [19.3, 23.8, 25.2, 25.7, 29.2, 30.4 (6 x CH<sub>2</sub>, C8, C9, C10, C13, C14, C15)], 40.0 (CH<sub>2</sub>, C7), [61.9, 67.0 (2 x CH<sub>2</sub>, C11, C16)], 98.4 (CH, C12), [127.3, 130.0, 139.6, 142.3 (4 x CH, =CH), 200.2 (C<sub>quat</sub>, C=O), selected data for the (*Z*, *E*)-stereoisomer: 13.8 (CH<sub>3</sub>, C1), 40.5 (CH<sub>2</sub>, C7), [127.6, 129.0, 136.1, 136.2 (4 x CH<sub>2</sub>, =CH)]; *m/z* (ES) 289.1 [(M + Na)<sup>+</sup>, 100%] [Found [M + Na]<sup>+</sup> 289.1777. C<sub>16</sub>H<sub>26</sub>NaO<sub>3</sub> requires *M* + Na, 289.1780].

**[(3Z, 2S\*, 5S\*)-6-Oxo-11-tetrahydropyranyloxy-(2,3,4,5-η)-undec-3-en-2,5-diyl]tricarbonyliron 19b.** A solution of dienone **18b** (0.60 g, 2.25 mmol) in degassed Et<sub>2</sub>O (10 mL) was added to a stirred suspension of [Fe<sub>2</sub>(CO)<sub>9</sub>] (2.05 g, 5.63 mmol) in degassed Et<sub>2</sub>O (30 mL). The mixture was heated at 40 °C for 42 h in the absence of light and then filtered through a short plug of SiO<sub>2</sub>. Concentration of the filtrate under reduced pressure gave a dark brown residue, which was purified by SiO<sub>2</sub> column chromatography (hexane/Et<sub>2</sub>O, gradient 8:1 to 4:1 to 2:1), to yield iron complex **19b** as an orange oil (0.59 g, 64%); *R<sub>f</sub>* (hexane/Et<sub>2</sub>O, 1:1) 0.34;  $\nu_{\max}(\text{film})/\text{cm}^{-1}$  2943s, 2866m, 2051s (CO),

1976s br (CO), 1675s (C=O), 1461m, 1441m, 1353m, 1201m, 1174m, 1137s, 1120s, 1077s, 1034s;  $\delta_{\text{H}}$ (300 MHz; CDCl<sub>3</sub>) 1.21 (1H, d, *J* 8.1, C(5)*H*), 1.31-1.85 (16H, stack, including [1.46 (3H, d, *J* 5.5, C(1)*H*<sub>3</sub>)], C(2)*H*, C(8)*H*<sub>2</sub>, C(9)*H*<sub>2</sub>, C(10)*H*<sub>2</sub>, C(13)*H*<sub>2</sub>, C(14)*H*<sub>2</sub>, C(15)*H*<sub>2</sub>, C(1)*H*<sub>3</sub>), 2.30-2.42 (2H, m, C(7)*H*<sub>2</sub>), 3.31-3.42 (1H, m, C(11)*H*<sub>a</sub> or C(16)*H*<sub>a</sub>), 3.43-3.54 (1H, m, C(16)*H*<sub>a</sub> or C(11)*H*<sub>a</sub>), 3.67-3.77 (1H, m, C(11)*H*<sub>b</sub> or C(16)*H*<sub>b</sub>), 3.80-3.90 (1H, m, C(16)*H*<sub>b</sub> or C(11)*H*<sub>b</sub>), 4.52-4.59 (1H, m, C(12)*H*), 5.23 (1H, dd, *J* 8.1, 5.2, C(3)*H*), 5.77 (1H, dd, *J* 8.1, 5.2, C(4)*H*);  $\delta_{\text{C}}$ (75 MHz; CDCl<sub>3</sub>) 18.9 (CH<sub>3</sub>, C1), [19.4, 24.3, 25.3, 25.7, 29.3, 30.5 (6 x CH<sub>2</sub>, C8, C9, C10, C13, C14, C15)], 42.4 (CH<sub>2</sub>, C7), [53.3, 59.1 (2 x CH, C2, C5)], [62.02, 62.03, 67.1 (CH<sub>2</sub>, C16, C11)], [81.1, 88.4 (2 x CH, C3, C4)], 98.6 (CH, C12), 205.1 (C<sub>quat</sub>, C=O); *m/z* (ES) 429.1 [(M + Na)<sup>+</sup>, 100%] [Found [M + Na]<sup>+</sup> 429.0970. C<sub>19</sub>H<sub>26</sub>FeNaO<sub>6</sub> requires *M* + Na, 429.0976].

**[(3Z, 2S\*, 5S\*)-11-Hydroxy-6-oxo-(2,3,4,5-η)-undec-3-en-2,5-diyl]tricarbonyliron.** *p*PTS (60 mg, 0.22 mmol) was added to a solution of THP-ether **19b** (300 mg, 0.74 mmol) in absolute EtOH (10 mL) at 40 °C. The reaction mixture was warmed to 50 °C. After 16 h at this temperature, the reaction mixture was cooled to rt before being partitioned between EtOAc (40 mL) and H<sub>2</sub>O (40 mL). The aqueous phase was extracted with EtOAc (2 x 50 mL) and the combined organic phases were washed with brine (50 mL) and dried (MgSO<sub>4</sub>). Concentration under reduced pressure yielded a yellow residue, which was purified by SiO<sub>2</sub> column chromatography (hexane/Et<sub>2</sub>O, 1:1), to provide [(3Z, 2S\*, 5S\*)-11-hydroxy-6-oxo-(2,3,4,5-η)-undec-3-en-2,5-diyl]tricarbonyliron as a yellow oil (0.22 g, 93%); *R*<sub>f</sub> (Et<sub>2</sub>O) 0.30;  $\nu_{\text{max}}$ (film)/cm<sup>-1</sup> 3406s br (OH), 2938s, 2862m, 2050s (CO), 1980s br (CO), 1668s (C=O), 1494m, 1461s, 1440s, 1380m, 1339m, 1299m, 1174m, 1073m, 1052m;  $\delta_{\text{H}}$ (300 MHz; CDCl<sub>3</sub>) 1.21 (1H, d, *J* 8.1, C(5)*H*), 1.28-1.67 (10H, stack, C(1)*H*<sub>3</sub>, C(2)*H*, C(8)*H*<sub>2</sub>, C(9)*H*<sub>2</sub>, C(10)*H*<sub>2</sub>), 2.29-2.47 (2H, m, C(7)*H*<sub>2</sub>), 3.57-3.73 (2H, m, C(11)*H*<sub>2</sub>), 5.17-5.30 (1H, m, C(3)*H*), 5.72-5.84 (1H, m, C(4)*H*), resonance for *OH* not observed;  $\delta_{\text{C}}$ (75 MHz; CDCl<sub>3</sub>) 18.9 (CH<sub>3</sub>, C1), [24.1, 25.2, 32.2 (3 x CH<sub>2</sub>, C8, C9, C10)], 42.3 (CH<sub>2</sub>, C7), [53.3, 59.2 (2 x CH, C2, C5)], 62.1 (CH<sub>2</sub>, C11), [81.1, 88.5 (2 x CH, C3, C4)], 205.7 (C<sub>quat</sub>, C=O); *m/z* (ES) 345.0 [(M +

Na)<sup>+</sup>, 100%] [Found [M + Na]<sup>+</sup> 345.0413. C<sub>14</sub>H<sub>18</sub>FeNaO<sub>5</sub> requires M + Na, 345.0401].

**[(3Z, 2S\*, 5S\*)-6,11-Dioxo-(2,3,4,5-η)-undec-3-en-2,5-diyl]tricarbonyliron 8b.** A solution of DMSO (210 μL, 2.98 mmol) in CH<sub>2</sub>Cl<sub>2</sub> (3 mL) was added *via* cannula over 5 min to a cold (-78 °C) solution of (COCl)<sub>2</sub> (13 μL, 1.49 mmol) in CH<sub>2</sub>Cl<sub>2</sub> (4 mL). The reaction mixture was stirred at -78 °C for 1 h before a solution of [(3Z, 2S\*, 5S\*)-11-hydroxy-6-oxo-(2,3,4,5-η)-undec-3-en-2,5-diyl]tricarbonyliron (200 mg, 0.62 mmol) in CH<sub>2</sub>Cl<sub>2</sub> (3 mL) was added. The reaction mixture was stirred for 1 h at -78 °C, and then Et<sub>3</sub>N (87 μL, 6.21 mmol) was added dropwise over 5 min. After 1 h, H<sub>2</sub>O (10 mL) was added at -78 °C and the reaction mixture then allowed to warm to rt. The two phases were separated, and the aqueous phase was extracted with CH<sub>2</sub>Cl<sub>2</sub> (3 x 10 mL). The combined organic phases were dried (MgSO<sub>4</sub>) and then concentrated under reduced pressure. Purification of the residue by SiO<sub>2</sub> column chromatography (hexane/Et<sub>2</sub>O, 3:2) provided keto-aldehyde **8b** as an orange oil (170 mg, 86%); *R<sub>f</sub>* (Et<sub>2</sub>O) 0.56; (Found: C, 52.36; H, 4.79. C<sub>14</sub>H<sub>16</sub>FeO<sub>5</sub> requires C, 52.53; H, 5.04%);  $\nu_{\max}(\text{film})/\text{cm}^{-1}$  2947m, 2863m, 2724m, 2051s (CO), 1980s br (CO), 1724s (C=O), 1673s (C=O), 1494m, 1461s, 1441s, 1380m, 1364m, 1174s, 1111m, 1033m;  $\delta_{\text{H}}(300 \text{ MHz}; \text{CDCl}_3)$  1.20 (1H, d, *J* 7.9, C(5)*H*), 1.41-1.68 (8H, stack, including [1.47 (3H, d, *J* 5.9, C(1)*H*<sub>3</sub>]), C(2)*H*, C(8)*H*<sub>2</sub>, C(9)*H*<sub>2</sub>, C(1)*H*<sub>3</sub>), 2.33-2.50 (4H, stack, C(7)*H*<sub>2</sub>, C(10)*H*<sub>2</sub>), 5.24 (1H, dd, *J* 8.1, 5.2, C(3)*H*), 5.78 (1H, dd, *J* 7.9, 5.2, C(4)*H*), 9.76 (1H, s, CHO);  $\delta_{\text{C}}(75 \text{ MHz}; \text{CDCl}_3)$  19.0 (CH<sub>3</sub>, C1), [21.4, 23.7 (2 x CH<sub>2</sub>, C8, C9)], [41.9, 43.4 (2 x CH<sub>2</sub>, C7, C10)], [53.2, 59.3 (2 x CH, C2, C5)], [81.1, 88.6 (2 x CH, C3, C4)], 202.0 (CH, C=O), 204.7 (C<sub>quat</sub>, C=O); *m/z* (ES) 359.1 [(M + K)<sup>+</sup>, 14%], 343.1 (100, M + Na) [Found [M + Na]<sup>+</sup> 343.0238. C<sub>14</sub>H<sub>16</sub>FeNaO<sub>5</sub> requires M + Na, 343.0245].

**[(2Z, 1S\*, 4S\*, 2'R\*)-1-[(*N*-Benzyl)piperidin-2'-yl]-(1,2,3,4-η)-penta-2-en-1,4-diyl]tricarbonyliron 7aa.** A solution of keto-aldehyde **8a** (57 mg, 0.186 mmol) in THF (1 mL) was added to a stirred suspension of BnNH<sub>2</sub> (24 μL, 0.223 mmol) and NaBH(OAc)<sub>3</sub> (158 mg, 0.744 mmol) in THF (2 mL). The

reaction mixture was stirred at rt for 12 h, and then partitioned between Et<sub>2</sub>O (5 mL) and NaHCO<sub>3</sub> solution (5 mL). The aqueous phase was extracted with Et<sub>2</sub>O (3 x 5 mL), and the combined organic phases were washed with brine (10 mL), dried (MgSO<sub>4</sub>) and the solvent removed under reduced pressure. Purification of the residue by SiO<sub>2</sub> column chromatography (hexane/Et<sub>2</sub>O, 6:1 plus 1% Et<sub>3</sub>N) yielded piperidine **7aa** as a yellow oil (60 mg, 85%); *R<sub>f</sub>* (hexane/Et<sub>2</sub>O, 4:1) 0.44; (Found: C, 63.23; H, 5.93; N, 3.79. C<sub>20</sub>H<sub>23</sub>FeNO<sub>3</sub> requires C, 63.01; H, 6.08; N, 3.67%);  $\nu_{\max}(\text{film})/\text{cm}^{-1}$  3027w, 2934s, 2856m, 2788m, 2039s (CO), 1962s br (CO), 1494w, 1442m, 1380w, 1366w, 1029w;  $\delta_{\text{H}}(300 \text{ MHz}; \text{CDCl}_3)$  1.05-1.17 (1H, m, C(1)*H*), 1.31-1.55 (6H, stack, including [1.40 (3H, d, *J* 6.3, C(5)*H*<sub>3</sub>], C(4)*H*, CH<sub>2</sub>CH<sub>2</sub>CHN, C(5)*H*<sub>3</sub>), 1.58-1.78 (3H, stack, CH<sub>a</sub>H<sub>b</sub>CHN, CH<sub>2</sub>CH<sub>2</sub>N), 1.83-2.08 (3H, stack, CH<sub>a</sub>H<sub>b</sub>CHN, CH<sub>a</sub>H<sub>b</sub>N), 2.60-2.74 (1H, m, CH<sub>a</sub>H<sub>b</sub>N), 3.06-3.21 (1H, m, CH<sub>a</sub>H<sub>b</sub>Ph), 4.20-4.37 (1H, m, CH<sub>a</sub>H<sub>b</sub>Ph), 4.98 (1H, dd, *J* 8.5, 4.8, C(2)*H* or C(3)*H*), 5.03-5.13 (1H, m, C(3)*H* or C(2)*H*), 7.17-7.39 (5H, stack, Ph*H*);  $\delta_{\text{C}}(100 \text{ MHz}; \text{CDCl}_3)$  18.8 (CH<sub>3</sub>, C5), 23.3 (CH<sub>2</sub>, CH<sub>2</sub>CH<sub>2</sub>CHN), 25.2 (CH<sub>2</sub>, CH<sub>2</sub>CH<sub>2</sub>N), 35.6 (CH<sub>2</sub>, CH<sub>2</sub>CHN), 50.7 (CH<sub>2</sub>, CH<sub>2</sub>N), 58.0 (CH, C4), 58.8 (CH<sub>2</sub>, CH<sub>2</sub>Ph), 65.2 (2 x CH, C1, CHN, overlapping resonances), 84.2 (CH, C3), 84.5 (CH, C2), 127.0 (CH, *p*-Ph), 128.5 (CH, *m*-Ph), 129.0 (CH, *o*-Ph), (C<sub>quat</sub>, *ipso*-Ph) not observed; *m/z* (ES) 382.0 [(M + H)<sup>+</sup>, 98%], 298.0 (100, M + H - 3CO) [Found [M + H]<sup>+</sup> 382.1116. C<sub>20</sub>H<sub>24</sub>FeNO<sub>3</sub> requires *M* + H, 382.1106].

**[(2Z, 1S\*, 4S\*, 2'R\*)-1-[N-(*para*-Methoxybenzyl)piperidin-2'-yl]-(1,2,3,4- $\eta$ )-penta-2-en-1,4-diy]tricarbonyliron **7ab**.** Keto-aldehyde **8a** (57 mg, 0.186 mmol), *p*-methoxybenzylamine (29  $\mu$ L, 0.223 mmol) and NaBH(OAc)<sub>3</sub> (158 mg, 0.744 mmol) were reacted as detailed for **7aa**. After 12 h, work up and purification by SiO<sub>2</sub> column chromatography (hexane/Et<sub>2</sub>O, 4:1 plus 1% Et<sub>3</sub>N) afforded piperidine **7ab** as a yellow oil (63 mg, 82%); *R<sub>f</sub>* (hexane/Et<sub>2</sub>O, 4:1) 0.24; (Found: C, 61.16; H, 6.29; N, 3.55. C<sub>21</sub>H<sub>25</sub>FeNO<sub>4</sub> requires C, 61.33; H, 6.13; N, 3.41%);  $\nu_{\max}(\text{film})/\text{cm}^{-1}$  2998w, 2934s, 2856m, 2835m, 2786m, 2714w, 2038s (CO), 1962s br (CO), 1612m, 1585w, 1511s, 1464m, 1442m, 1300m, 1248s, 1180m, 1171m, 1037s;  $\delta_{\text{H}}(300 \text{ MHz}; \text{CDCl}_3)$  1.10 (1H, app t, *J* 9.0, C(1)*H*), 1.18-1.27 (1H, m, C(4)*H*), 1.29-1.50 (6H, stack, including [1.41

(3H, d,  $J$  6.3, C(5) $H_3$ )]  $CH_2CH_aH_bCH_2N$ , C(5) $H_3$ ), 1.57-1.75 (2H, stack,  $CH_aH_bCH_2N$ ,  $CH_aH_bCHN$ ), 1.83-2.01 (3H, stack,  $CH_aH_bCHN$ ,  $CH_aH_bN$ ), 2.57-2.69 (1H, m,  $CH_aH_bN$ ), 3.04 (1H, d,  $J$  12.9,  $CH_aH_bAr$ ), 3.79 (3H, s,  $OCH_3$ ), 4.19 (1H, d,  $J$  12.9,  $CH_aH_bAr$ ), 4.98 (1H, dd,  $J$  8.5, 4.8, C(3) $H$ ), 5.06 (1H, dd,  $J$  9.0, 4.8, C(2) $H$ ), 6.83 (2H, d,  $J$  8.3,  $CH_{Ar}$ ), 7.20 (2H, d,  $J$  8.3,  $CH_{Ar}$ );  $\delta_C$ (100 MHz;  $CDCl_3$ ) 18.8 ( $CH_3$ , C5), 23.3 ( $CH_2$ ,  $CH_2CH_2CHN$ ), 25.2 ( $CH_2$ ,  $CH_2CH_2N$ ), 35.5 ( $CH_2$ ,  $CH_2CHN$ ), 50.4 ( $CH_2$ ,  $CH_2N$ ), 55.1 ( $CH_3$ ,  $OCH_3$ ), 58.0 ( $CH$ , C4), 58.2 ( $CH_2$ ,  $CH_2Ar$ ), [64.9, 65.1 (2 x  $CH$ , C1,  $CHN$ )], 84.2 ( $CH$ , C3), 84.6 ( $CH$ , C2), 113.8 ( $CH$ ,  $CH_{Ar}$ ), 130.1 ( $CH$ ,  $CH_{Ar}$ ), 132.1 ( $C_{quat}$ , *ipso*-C), 159.0 ( $C_{quat}$ ,  $COMe$ );  $m/z$  (ES) 412.0 [( $M + H$ )<sup>+</sup>, 100%], 328.1 (43,  $M + H - 3CO$ ) [Found [ $M + H$ ]<sup>+</sup> 412.1226.  $C_{21}H_{26}FeNO_4$  requires  $M + H$ , 412.1211].

**[(2Z, 1S\*, 4S\*, 2'R\*)-1-[(*N*-Butyl)piperidin-2'-yl]-(1,2,3,4- $\eta$ )-penta-2-en-1,4-diy]tricarbonyliron **7ac**.** Keto-aldehyde **8a** (50 mg, 0.163 mmol),  $BuNH_2$  (19  $\mu$ L, 0.196 mmol) and  $NaBH(OAc)_3$  (138 mg, 0.652 mmol) were reacted as detailed for **7aa**. After 12 h, work up and purification by  $SiO_2$  column chromatography (hexane/ $Et_2O$ , 2:1 plus 1%  $Et_3N$ ) afforded piperidine **7ac** as a yellow oil (46 mg, 81%);  $R_f$  (hexane/ $Et_2O$ , 2:1) 0.20;  $\nu_{max}$ (film)/ $cm^{-1}$  2933s, 2860s, 2788m, 2039s (CO), 1962s br (CO), 1442m, 1379m, 1364w, 1264w, 1236w, 1189w, 1139w, 1087w;  $\delta_H$ (300 MHz;  $CDCl_3$ ) 0.83-1.02 (4H, stack, including [0.91 (3H, t,  $J$  7.0,  $CH_2CH_3$ ), 0.97 (1H, apparent t,  $J$  9.0, C(1) $H$ )],  $CH_2CH_3$ , C(1) $H$ ), 1.14-1.63 (12H, stack, including [1.39 (3H, d,  $J$  6.3, C(5) $H_3$ )], C(4) $H$ ,  $CH_2CH_2CH_2NBu$ ,  $CH_2CH_2CH_3$ , C(5) $H_3$ ), 1.65-1.75 (1H, m,  $CH_aH_bCHN$ ), 1.78-1.94 (2H, stack,  $CH_aH_bCHN$ ), 2.00-2.13 (1H, m,  $CH_aH_bNBu$ ), 2.22-2.35 (1H, m,  $CH_aH_bPr$ ), 2.76-2.93 (2H, stack,  $CH_aH_bNBu$ ,  $CH_aH_bPr$ ), 4.96 (1H, dd,  $J$  8.5, 4.8, C(3) $H$ ), 5.04 (1H, dd,  $J$  9.0, 4.8, C(2) $H$ );  $\delta_C$ (75 MHz;  $CDCl_3$ ) 14.1 ( $CH_3$ ,  $CH_2CH_3$ ), 19.2 ( $CH_3$ , C5), 20.9 ( $CH_2$ ,  $CH_2CH_3$ ), 23.8 ( $CH_2$ ,  $CH_2CH_2CHN$ ), 25.7 ( $CH_2$ ,  $CH_2CH_2NBu$ ), 28.5 ( $CH_2$ ,  $CH_2CH_2CH_3$ ), 36.0 ( $CH_2$ ,  $CH_2CHN$ ), [51.0, 54.0 (2 x  $CH_2$ , 2 x  $CH_2N$ )], 58.1 ( $CH$ , C4), 64.5 ( $CH$ , C1), 65.3 ( $CH$ ,  $CHN$ ), 84.1 ( $CH$ , C3), 84.2 ( $CH$ , C2);  $m/z$  (ES) 348.1 [( $M + H$ )<sup>+</sup>, 100%], 264.2 (17,  $M + H - 3CO$ ) [Found [ $M + H$ ]<sup>+</sup> 348.1266.  $C_{17}H_{26}FeNO_3$  requires  $M + H$ , 348.1262].

**[(2Z, 1S\*, 4S\*, 2'R\*)-1-[N-(tert-Butyldimethylsilyloxyethyl)piperidin-2'-yl]-(1,2,3,4-η)-penta-2-en-1,4-diy]tricarbonyliron 7ad.** Glacial AcOH was added dropwise to a stirred solution of ethanolamine (13 μL, 0.223 mmol) in THF (3 mL) until the mixture reached pH 6. A solution of keto-aldehyde **8a** (57 mg, 0.186 mmol) in THF (2 mL) and NaBH(OAc)<sub>3</sub> (158 mg, 0.744 mmol) were then added. After 12 h, work up as detailed for **7aa** yielded a yellow oil. This was dissolved in CH<sub>2</sub>Cl<sub>2</sub> (2 mL) and treated with imidazole (51 mg, 0.744 mmol) and <sup>t</sup>BuMe<sub>2</sub>SiCl (56 mg, 0.372 mmol). The reaction mixture was stirred for 16 h and then partitioned between H<sub>2</sub>O (8 mL) and CH<sub>2</sub>Cl<sub>2</sub> (8 mL). The aqueous phase was extracted with CH<sub>2</sub>Cl<sub>2</sub> (2 x 8 mL), the combined organic phases were dried (MgSO<sub>4</sub>) and the solvent removed under reduced pressure. The residue was purified by SiO<sub>2</sub> column chromatography (hexane/Et<sub>2</sub>O, 2:1 plus 1% Et<sub>3</sub>N) to afford piperidine **7ad** as a yellow oil (0.059 g, 71%); *R<sub>f</sub>* (hexane/Et<sub>2</sub>O, 1:1) 0.36;  $\nu_{\max}(\text{film})/\text{cm}^{-1}$  2931s, 2857s, 2041s (CO), 1962s br (CO), 1472m, 1463m, 1442m, 1380w, 1362w, 1256s, 1095s, 1033m;  $\delta_{\text{H}}(300 \text{ MHz; CDCl}_3)$  0.05 (6H, s, Si(CH<sub>3</sub>)<sub>2</sub>), 0.88 (9H, s, SiC(CH<sub>3</sub>)<sub>3</sub>), 0.96 (1H, apparent t, *J* 9.2, C(1)*H*), 1.21-1.43 (5H, stack, including [1.39 (3H, d, *J* 5.9, C(5)*H*<sub>3</sub>], C(4)*H*, CH<sub>a</sub>H<sub>b</sub>CH<sub>2</sub>CHN, C(5)*H*<sub>3</sub>), 1.46-1.59 (3H, stack, CH<sub>2</sub>CH<sub>a</sub>H<sub>b</sub>CH<sub>2</sub>CHN), 1.64-1.75 (1H, m, CH<sub>a</sub>H<sub>b</sub>CHN), 1.77-1.87 (1H, m, CH<sub>a</sub>H<sub>b</sub>CHN), 1.92-2.03 (1H, m, CHN), 2.15-2.27 (1H, m, CH<sub>a</sub>H<sub>b</sub>N), 2.45-2.57 (1H, m, CH<sub>a</sub>H<sub>b</sub>CH<sub>2</sub>O), 2.79-2.90 (1H, m, CH<sub>a</sub>H<sub>b</sub>N), 2.95-3.05 (1H, m, CH<sub>a</sub>H<sub>b</sub>CH<sub>2</sub>O), 3.60-3.78 (2H, m, CH<sub>2</sub>OSi), 4.98 (1H, dd, *J* 9.2, 5.2, C(2)*H*), 5.13 (1H, dd, *J* 8.8, 5.2, C(3)*H*);  $\delta_{\text{C}}(100 \text{ MHz; CDCl}_3)$  -5.7 (CH<sub>3</sub>, Si(CH<sub>3</sub>)<sub>2</sub>), 18.0 (C<sub>quat</sub>, SiC(CH<sub>3</sub>)<sub>3</sub>), 18.8 (CH<sub>3</sub>, C5), 23.4 (CH<sub>2</sub>, CH<sub>2</sub>CH<sub>2</sub>CHN), 25.3 (CH<sub>2</sub>, CH<sub>2</sub>CH<sub>2</sub>N), 25.7 (CH<sub>3</sub>, SiC(CH<sub>3</sub>)<sub>3</sub>), 35.7 (CH<sub>2</sub>, CH<sub>2</sub>CHN), [52.1, 55.7 (2 x CH<sub>2</sub>, 2 x CH<sub>2</sub>N)], 58.0 (CH, C4), 61.6 (CH<sub>2</sub>, CH<sub>2</sub>OSi), [64.7, 65.3 (2 x CH, C1, CHN)], 84.2 (CH, C3), 84.6 (CH, C2); *m/z* (ES) 450.3 [(M + H)<sup>+</sup>, 100%], 366.3 (49, M + H - 3CO), 310.3 (16, M + H - Fe(CO)<sub>3</sub>) [Found [M + H]<sup>+</sup> 450.1748. C<sub>21</sub>H<sub>36</sub>FeNO<sub>4</sub>Si requires *M* + H, 450.1763].

**[(2Z, 1S\*, 4S\*, 2'R\*)-1-[N-(Prop-2''-enyl)piperidin-2'-yl]-(1,2,3,4-η)-penta-2-en-1,4-diy]tricarboxyliron 7ae.** Keto-aldehyde **8a** (100 mg, 0.327 mmol), allylamine (30 μL, 0.392 mmol) and NaBH(OAc)<sub>3</sub> (280 mg, 1.308 mmol) were reacted as detailed for **7aa**. After 12 h, work up and purification by SiO<sub>2</sub> column chromatography (hexane/Et<sub>2</sub>O, 1:2 plus 1% Et<sub>3</sub>N) afforded piperidine **7ae** as a yellow oil (87 mg, 80%); *R<sub>f</sub>* (Et<sub>2</sub>O) 0.24; (Found: C, 58.07; H, 6.44; N, 4.38. C<sub>16</sub>H<sub>21</sub>FeNO<sub>3</sub> requires C, 58.02; H, 6.39; N, 4.23%);  $\nu_{\max}$ (film)/cm<sup>-1</sup> 2934m, 2856m, 2785m, 2039s (CO), 1962s br (CO), 1642w, 1442m, 1379w, 1364w, 1126w;  $\delta_{\text{H}}$ (300 MHz; CDCl<sub>3</sub>) 0.97 (1H, apparent t, *J* 9.4, C(1)*H*), 1.16-2.06 (12H, stack, including [1.39 (3H, d, *J* 6.3, C(5)*H*<sub>3</sub>)], CHNCH<sub>2</sub>CH<sub>2</sub>CH<sub>2</sub>CH<sub>a</sub>H<sub>b</sub>, C(4)*H*, C(5)*H*<sub>3</sub>), 2.77-2.93 (2H, stack, CH<sub>a</sub>H<sub>b</sub>N, CH<sub>a</sub>H<sub>b</sub>CH=CH<sub>2</sub>), 3.65 (1H, dd, *J* 13.4, 5.0, CH<sub>a</sub>H<sub>b</sub>CH=CH<sub>2</sub>), 4.97 (1H, dd, *J* 8.8, 5.2, C(2)*H* or C(3)*H*), 5.06 (1H, dd, *J* 8.8, 4.8, C(3)*H* or C(2)*H*), 5.10-5.24 (2H, stack, CH=CH<sub>2</sub>), 5.76-5.92 (1H, m, CH=CH<sub>2</sub>);  $\delta_{\text{C}}$ (75 MHz; CDCl<sub>3</sub>) 19.1 (CH<sub>3</sub>, C5), 23.9 (CH<sub>2</sub>, CH<sub>2</sub>CH<sub>2</sub>CHN), 25.7 (CH<sub>2</sub>, CH<sub>2</sub>CH<sub>2</sub>N), 36.1 (CH<sub>2</sub>, CH<sub>2</sub>CHN), 51.2 (CH<sub>2</sub>, CH<sub>2</sub>N), 57.8 (CH<sub>2</sub>, CH<sub>2</sub>CH=CH<sub>2</sub>), 58.1 (CH, C4), 64.6 (CH, C1), 64.9 (CH, CHN), 84.1 (CH, C3), 84.3 (CH, C2), 117.4 (CH<sub>2</sub>, CH=CH<sub>2</sub>), 136.0 (CH, CH=CH<sub>2</sub>); *m/z* (ES) 332.1 [(M + H)<sup>+</sup>, 91%], 248.1 (100, M - 3CO + H) [Found [M + H]<sup>+</sup> 332.0965. C<sub>16</sub>H<sub>22</sub>FeNO<sub>3</sub> requires M + H, 332.0949].

**[(2Z, 2''E, 1S\*, 4S\*, 2'R\*)-1-[N-(3''-Bromo-2''-methylprop-2''-enyl)piperidin-2'-yl]-(1,2,3,4-η)-penta-2-en-1,4-diy]tricarboxyliron and [(2Z, 2''Z, 1S\*, 4S\*, 2'R\*)-1-[N-(3''-bromo-2''-methylprop-2''-enyl)piperidin-2'-yl]-(1,2,3,4-η)-penta-2-en-1,4-diy]tricarboxyliron 7af.** A solution of 1-bromo-3-[N-(*tert*-butoxycarbonyl)amino]-2-methylprop-1-ene (163 mg, 0.65 mmol, 5:1 mixture of (*E*)/(*Z*) isomers) in CH<sub>2</sub>Cl<sub>2</sub> (7 mL) was cooled to 0 °C and treated with an excess of CF<sub>3</sub>CO<sub>2</sub>H (2 mL). After 30 min, the volatiles were removed under reduced pressure, and the residue dissolved in THF (10 mL) and treated with Et<sub>3</sub>N (273 μL, 1.96 mmol). After stirring for 5 min, NaBH(OAc)<sub>3</sub> (280 mg, 1.31 mmol) was added to the reaction mixture, shortly followed by a solution of keto-aldehyde **8a** (100 mg, 0.33 mmol) in THF (5 mL). After 12 h, work up as detailed for **7aa** and

purification by SiO<sub>2</sub> column chromatography (hexane/Et<sub>2</sub>O, 4:1 plus 1% Et<sub>3</sub>N) afforded piperidine **7af** as a yellow crystalline solid (0.119 g, 86%, mixture of (*E*)/(*Z*) isomers, 5:1). SiO<sub>2</sub> column chromatography (hexane/Et<sub>2</sub>O, 16:1 plus 1% Et<sub>3</sub>N) allowed separation of the two isomers. Data for (*E*)-isomer: *R*<sub>f</sub> (hexane/Et<sub>2</sub>O, 4:1) 0.67; (Found: C, 48.38; H, 5.06; N, 3.29. C<sub>17</sub>H<sub>22</sub>BrFeNO<sub>3</sub> requires C, 48.14; H, 5.23; N, 3.30%);  $\nu_{\max}$ (CH<sub>2</sub>Cl<sub>2</sub> film)/cm<sup>-1</sup> 2937m, 2857w, 2791w, 2040s (CO), 1968s br (CO), 1632w (C=C), 1442w, 1265m, 1031w;  $\delta_{\text{H}}$ (300 MHz; CDCl<sub>3</sub>) 0.96 (1H, apparent t, *J* 8.8, C(1)*H*), 1.15-1.94 (15H, stack, including [1.40 (3H, d, *J* 6.3, C(5)*H*<sub>3</sub>)], [1.73 (3H, s, =CCH<sub>3</sub>)], C(4)*H*, CHNCH<sub>2</sub>CH<sub>2</sub>CH<sub>2</sub>CH<sub>a</sub>H<sub>b</sub>, C(5)*H*<sub>3</sub>, =CCH<sub>3</sub>), 2.57-2.68 (2H, stack, CH<sub>a</sub>H<sub>b</sub>N, CH<sub>a</sub>H<sub>b</sub>C=), 3.58 (1H, d, *J* 13.2, CH<sub>a</sub>H<sub>b</sub>C=), 4.93-5.03 (2H, stack, C(3)*H*, C(2)*H*), 6.06 (1H, s, =CHBr);  $\delta_{\text{C}}$ (75 MHz; CDCl<sub>3</sub>) 17.9 (CH<sub>3</sub>, =CCH<sub>3</sub>), 19.0 (CH<sub>3</sub>, C5), 23.5 (CH<sub>2</sub>, CH<sub>2</sub>CH<sub>2</sub>CHN), 25.6 (CH<sub>2</sub>, CH<sub>2</sub>CH<sub>2</sub>N), 35.8 (CH<sub>2</sub>, CH<sub>2</sub>CHN), 50.4 (CH<sub>2</sub>, CH<sub>2</sub>N), 58.0 (CH, C4), 60.9 (CH<sub>2</sub>, CH<sub>2</sub>C=), 64.6 (CH, C1), 65.0 (CH, CHN), 84.1 (CH, C3), 84.2 (CH, C2), 103.2 (CH, =CHBr), 140.4 (C<sub>quat</sub>, =CMe); *m/z* (ES) 426 {[M (Br 81) + H]<sup>+</sup>, 88%}, 424 [92, M (Br 79) + H], 342 [86, M (Br 81) – 3CO + H], 340 [100, M (Br 79) – 3CO + H] [Found [M (Br 79) + H]<sup>+</sup> 424.0199. C<sub>17</sub>H<sub>23</sub>BrFeNO<sub>3</sub> requires M (Br 79) + H, 424.0211]. Data for (*Z*)-isomer: *R*<sub>f</sub> (hexane/Et<sub>2</sub>O, 4:1) 0.51; (Found: C, 48.29; H, 5.21; N, 3.44. C<sub>17</sub>H<sub>22</sub>BrFeNO<sub>3</sub> requires C, 48.14; H, 5.23; N, 3.30%);  $\nu_{\max}$ (CH<sub>2</sub>Cl<sub>2</sub> film)/cm<sup>-1</sup> 2937m, 2856m, 2790m, 2040s (CO), 1962s br (CO), 1631w (C=C), 1442m, 1380m, 1264m, 1034m;  $\delta_{\text{H}}$ (300 MHz; CDCl<sub>3</sub>) 0.97 (1H, apparent t, *J* 9.0, C(1)*H*), 1.15-2.00 (15H, stack, including [1.40 (3H, d, *J* 5.9, C(5)*H*<sub>3</sub>)], [1.73 (3H, s, =CCH<sub>3</sub>)], C(4)*H*, CHNCH<sub>2</sub>CH<sub>2</sub>CH<sub>2</sub>CH<sub>a</sub>H<sub>b</sub>, C(5)*H*<sub>3</sub>, =CCH<sub>3</sub>), 2.59-2.71 (1H, m, CH<sub>a</sub>H<sub>b</sub>), 3.07 (1H, d, *J* 12.9, CH<sub>a</sub>H<sub>b</sub>C=), 3.53 (1H, d, *J* 12.9, CH<sub>a</sub>H<sub>b</sub>C=), 4.99 (1H, dd, *J* 8.8, 5.0, C(3)*H*), 5.07 (1H, dd, *J* 9.0, 5.0, C(2)*H*), 5.98 (1H, s, =CHBr);  $\delta_{\text{C}}$ (75 MHz; CDCl<sub>3</sub>) 19.1 (CH<sub>3</sub>, C5), 21.3 (CH<sub>3</sub>, =CCH<sub>3</sub>), 23.8 (CH<sub>2</sub>, CH<sub>2</sub>CH<sub>2</sub>CHN), 25.7 (CH<sub>2</sub>, CH<sub>2</sub>CH<sub>2</sub>N), 35.8 (CH<sub>2</sub>, CH<sub>2</sub>CHN), 50.6 (CH<sub>2</sub>, CH<sub>2</sub>N), 56.8 (CH<sub>2</sub>, CH<sub>2</sub>C=), 58.0 (CH, C4), 65.2 (CH, C1), 65.4 (CH, CHN), 84.2 (CH, C3), 84.6 (CH, C2), 102.6 (CH, CHBr), 140.1 (C<sub>quat</sub>, =CMe); *m/z* (ES) 426.2 {[M (Br 81) + H]<sup>+</sup>, 87%}, 424.2 [100, M (Br 79) + H], 342.2 [37, M (Br 81) – 3CO + H], 340.2 [48, M (Br 79) – 3CO + H] [Found



[M (Br 79) + H]<sup>+</sup> 424.0215. C<sub>17</sub>H<sub>23</sub>BrFeNO<sub>3</sub> requires M (Br 79) + H, 424.0211].

**[(2Z, 2''Z, 1S\*, 4S\*, 2'R\*)-1-[N-(2''-Bromo-3''-trimethylsilyl-prop-2''-enyl)piperidin-2'-yl]-(1,2,3,4-η)-penta-2-en-1,4-diyl]tricarbonyliron 7ag.** A solution of (2Z)-2-bromo-1-[N-(*tert*-butoxycarbonyl)]-3-trimethylsilyl-prop-2-enylamine (480 mg, 1.56 mmol) in CH<sub>2</sub>Cl<sub>2</sub> (10 mL) was cooled to 0 °C and treated with an excess of CF<sub>3</sub>CO<sub>2</sub>H (3 mL). After 30 min, the volatiles were removed under reduced pressure and the residue was dissolved in THF (25 mL) and treated with Et<sub>3</sub>N (840 μL, 6.00 mmol). After stirring for 5 min, NaBH(OAc)<sub>3</sub> (1.02 g, 4.80 mmol) was added to the reaction mixture, followed by a solution of keto-aldehyde **8a** (370 mg, 1.20 mmol) in THF (10 mL). After 15 h, work up as detailed for **7aa** and purification by SiO<sub>2</sub> column chromatography (hexane/Et<sub>2</sub>O, 10:1 plus 1% Et<sub>3</sub>N) afforded piperidine **7ag** as a yellow oil (420 mg, 73%); *R<sub>f</sub>* (hexane/Et<sub>2</sub>O, 4:1) 0.66; *ν*<sub>max</sub>(film)/cm<sup>-1</sup> 3018w, 2935s, 2857s, 2790s, 2041s (CO), 1962s br (CO), 1609s (C=C), 1442s, 1380m, 1364m, 1334w, 1280w, 1248s, 1214w, 1180m, 1128m, 1098m, 1070w, 1045m, 1051m; *δ*<sub>H</sub>(300 MHz; CDCl<sub>3</sub>) 0.18 (9H, s, Si(CH<sub>3</sub>)<sub>3</sub>), 1.00 (1H, apparent t, *J* 8.8, C(1)*H*), 1.17-1.23 (1H, m, C(4)*H*), 1.40 (3H, d, *J* 6.3, C(5)*H*<sub>3</sub>), 1.49-1.75 (5H, stack, CH<sub>2</sub>CH<sub>2</sub>CH<sub>a</sub>H<sub>b</sub>CHN), 1.78-1.88 (1H, m, CH<sub>a</sub>H<sub>b</sub>CHN), 1.94-2.13 (2H, stack, CHN, CH<sub>a</sub>H<sub>b</sub>N), 2.72-2.83 (1H, m, CH<sub>a</sub>H<sub>b</sub>N), 3.02 (1H, d, *J* 15.3, CH<sub>a</sub>H<sub>b</sub>C=), 3.78 (1H, d, *J* 15.3, CH<sub>a</sub>H<sub>b</sub>C=), 4.94-5.06 (2H, stack, C(3)*H*, C(2)*H*), 6.31 (1H, s, =CH(TMS)); *δ*<sub>C</sub>(75 MHz; CDCl<sub>3</sub>) -0.8 (CH<sub>3</sub>, Si(CH<sub>3</sub>)<sub>3</sub>), 19.1 (CH<sub>3</sub>, C5), 23.5 (CH<sub>2</sub>, CH<sub>2</sub>CH<sub>2</sub>CHN), 25.6 (CH<sub>2</sub>, CH<sub>2</sub>CH<sub>2</sub>N), 35.5 (CH<sub>2</sub>, CH<sub>2</sub>CHN), 51.1 (CH<sub>2</sub>, CH<sub>2</sub>N), 58.1 (CH, C4), [64.3, 64.4 (2 x CH, C1, CHN)], 66.0 (CH<sub>2</sub>, CH<sub>2</sub>C=), 84.1 (CH, C3), 84.4 (CH, C2), 129.0 (CH, =CH(TMS)), 140.9 (C<sub>quat</sub>, =C); *m/z* (ES) 484.0 {[M (Br 81) + H]<sup>+</sup>, 87%}, 482.0 [100, M (Br 79) + H] [Found [M (Br 79) + H]<sup>+</sup> 482.0461. C<sub>19</sub>H<sub>29</sub>BrFeNO<sub>3</sub>Si requires M (Br 79) + H, 482.0449].

**(2'Z, 1''E, 3''E)-N-(2'-Bromo-3'-trimethylsilyl-prop-2'-ene)-2-(penta-1'',3''-dienyl) piperidine 20.** A solution of CuCl<sub>2</sub> (590 mg, 4.36 mmol) in EtOH (42 mL) was added quickly to a stirred solution of iron complex **7ag** (420 mg, 0.87 mmol) in EtOH (30 mL). The reaction mixture was stirred at rt for 10 min, and the solvent removed under reduced pressure. The residue was partitioned between H<sub>2</sub>O (75 mL) and Et<sub>2</sub>O (75 mL). The aqueous phase was extracted with Et<sub>2</sub>O (2 x 75 mL) and the combined organic phases were dried (MgSO<sub>4</sub>). Removal of the solvent under reduced pressure yielded diene **20** as a pale brown oil (290 mg, 99%) which was characterised without any further purification; *R<sub>f</sub>* (hexane/Et<sub>2</sub>O, 4:1) 0.63;  $\nu_{\max}(\text{film})/\text{cm}^{-1}$  3018m, 2934s, 2855s, 2787s, 2743w, 1609s (C=C), 1442m, 1379m, 1362m, 1332w, 1292w, 1248s, 1214w, 1179m, 1132m, 1101m, 1063w, 1048m;  $\delta_{\text{H}}(300 \text{ MHz; CDCl}_3)$  0.19 (9H, s, Si(CH<sub>3</sub>)<sub>3</sub>), 1.21-1.69 (6H, stack, CHNCH<sub>2</sub>CH<sub>2</sub>CH<sub>2</sub>), 1.74 (3H, d, *J* 6.8, CH<sub>3</sub>), 1.96 (1H, apparent dt, *J* 10.0, 3.0, CH<sub>a</sub>H<sub>b</sub>N), 2.68 (1H, apparent dt, *J* 10.0, 3.0, CH<sub>a</sub>H<sub>b</sub>), 2.81 (1H, d, *J* 15.4, CH<sub>a</sub>H<sub>b</sub>C=), 2.87-2.97 (1H, m, CHN), 3.66 (1H, d, *J* 15.4, CH<sub>a</sub>H<sub>b</sub>C=), 5.49 (1H, dd, *J* 14.2, 8.7, =CH), 5.57-5.70 (1H, m, =CH), 5.97-6.13 (2H, stack, 2 x =CH), 6.30 (1H, s, =CH(TMS));  $\delta_{\text{C}}(100 \text{ MHz; CDCl}_3)$  -1.3 (CH<sub>3</sub>, Si(CH<sub>3</sub>)<sub>3</sub>), 17.6 (CH<sub>3</sub>), 23.5 (CH<sub>2</sub>, CH<sub>2</sub>CH<sub>2</sub>CHN), 25.5 (CH<sub>2</sub>, CH<sub>2</sub>CH<sub>2</sub>N), 33.3 (CH<sub>2</sub>, CH<sub>2</sub>CHN), 52.2 (CH<sub>2</sub>, CH<sub>2</sub>N), 65.1 (CH, CHN), 67.1 (CH<sub>2</sub>, CH<sub>2</sub>C=), [128.8, 129.1, 131.6, 131.9, 134.3 (5 x CH, 4 x =CH, =CH(TMS))], 141.2 (C<sub>quat</sub>, =C); *m/z* (ES) 344.2 {[M (Br 81) + H]<sup>+</sup>, 93%}, 342.2 [100, M (Br 79) + H] [Found [M (Br 79) + H]<sup>+</sup> 342.1264. C<sub>16</sub>H<sub>29</sub>BrNSi requires M (Br 79) + H, 342.1253].

**[(3Z, 2S\*, 5S\*)-11-(Prop-2'-enyl)amino-6-oxo-(2,3,4,5-η)-undec-3-en-2,5-diyl]tricarbonyliron 21.** Keto-aldehyde **8b** (16 mg, 0.50 mmol), allylamine (50 μL, 0.60 mmol) and NaBH(OAc)<sub>3</sub> (420 mg, 2.00 mmol) were reacted as detailed for **7aa**. After 12 h, work up afforded keto-amine **21** as a yellow oil (0.18 g, quant). Selected data: *R<sub>f</sub>* (Et<sub>2</sub>O plus 1% Et<sub>3</sub>N) 0.13;  $\delta_{\text{C}}(75 \text{ MHz; CDCl}_3)$  18.9 (CH<sub>3</sub>, C1), [24.2, 26.7, 29.3 (3 x CH<sub>2</sub>, C8, C9, C10)], 42.2 (CH<sub>2</sub>, C7), [48.6, 52.0 (2 x CH<sub>2</sub>, C11, CH<sub>2</sub>CH=CH<sub>2</sub>)], [53.3, 59.1 (2 x CH, C2, C5)], [81.1, 88.4 (2 x CH, C3, C4)], 115.9 (CH<sub>2</sub>, CH<sub>2</sub>CH=CH<sub>2</sub>), 136.1 (CH, CH<sub>2</sub>CH=CH<sub>2</sub>), 205.1 (C<sub>quat</sub>, C=O); *m/z* (ES) 362.0 [(M + H)<sup>+</sup>, 100%], 278.0

(22, M - 3CO + H) [Found [M + H]<sup>+</sup> 362.1051. C<sub>17</sub>H<sub>24</sub>FeNO<sub>4</sub> requires M + H, 362.1055].

**[(3Z, 2S\*, 5S\*)-11-[N-Acetyl-N-(prop-2'-enyl)amino]-6-oxo-(2,3,4,5-η)-undec-3-en-2,5-diyl]tricarbonyliron 22 and [(3Z, 2S\*, 5S\*)-11-[N-ethyl-N-(prop-2'-enyl)amino]-6-oxo-(2,3,4,5-η)-undec-3-en-2,5-diyl]tricarbonyliron 23.** A solution of keto-amine **21** (180 mg, 0.50 mmol) in THF (10 mL) was treated with NaBH(OAc)<sub>3</sub> (210 mg, 1.00 mmol) and glacial AcOH (30 μL, 0.50 mmol) at rt. The reaction mixture was warmed to 70 °C, stirred at this temperature for 16 h, and then allowed to cool to rt. The reaction mixture was partitioned between Et<sub>2</sub>O (10 mL) and NaHCO<sub>3</sub> solution (10 mL), and the aqueous phase extracted with Et<sub>2</sub>O (2 x 10 mL). The combined organic phases were dried (MgSO<sub>4</sub>) and the solvent removed under reduced pressure. Purification of the residue by SiO<sub>2</sub> column chromatography yielded, in order of elution, keto-amide **22** (100 mg, 51%), and then keto-amine **23** (80 mg, 43%), both as yellow oils; **22**: *R<sub>f</sub>* (EtOAc plus 1% Et<sub>3</sub>N) 0.41;  $\nu_{\max}(\text{film})/\text{cm}^{-1}$  2936m, 2054s (CO), 1983s br (CO), 1672s (C=O), 1637s (C=O), 1460m, 1440m, 1266s;  $\delta_{\text{H}}(300 \text{ MHz}; \text{CDCl}_3)$  1.17-1.31 (3H, stack, C(2)H, C(5)H, C(9)H<sub>a</sub>), 1.42-1.62 (8H, stack, C(1)H<sub>3</sub>, C(8)H<sub>2</sub>, C(9)H<sub>b</sub>, C(10)H<sub>2</sub>), [2.04 (3/2H, s, C(O)CH<sub>3</sub>), 2.09 (3/2H, s, C(O)CH<sub>3</sub>) rotamers], 2.27-2.43 (2H, m, C(7)H<sub>2</sub>), [3.19 (1H, t, *J* 7.7, C(11)H<sub>a</sub>), 3.29 (1H, t, *J* 7.7, C(11)H<sub>b</sub>)], 3.84-3.96 (2H, m, CH<sub>2</sub>CH=CH<sub>2</sub>), 5.05-5.27 (3H, stack, CH<sub>2</sub>CH=CH<sub>a</sub>H<sub>b</sub>, C(3)H), 5.67-5.82 (2H, stack, CH<sub>2</sub>CH=CH<sub>2</sub>, C(4)H);  $\delta_{\text{C}}(75 \text{ MHz}; \text{CDCl}_3)$  19.1 (CH<sub>3</sub>, C1), [21.3, 21.5 (CH<sub>3</sub>, CH<sub>3</sub>CO), rotamers], [24.0, 24.2, 26.3, 26.5, 27.5, 28.5 (3 x CH<sub>2</sub>, C8, C9, C10), rotamers], [42.2, 42.4, 45.7, 47.7, 47.9, 51.0 (3 x CH<sub>2</sub>, C7, C11, CH<sub>2</sub>C=), rotamers], [53.38, 53.44, 59.3, 59.4 (2 x CH, C2, C5), rotamers], [81.18, 81.25, 88.6, 88.7 (2 x CH, C3, C4), rotamers], [116.3, 116.7 (CH<sub>2</sub>, CH<sub>2</sub>CH=CH<sub>2</sub>), rotamers], [132.9, 133.5 (CH, CH<sub>2</sub>CH=CH<sub>2</sub>), rotamers], [170.0, 170.5 (C<sub>quat</sub>, amide C=O), rotamers], [204.9, 205.3 (C<sub>quat</sub>, ketone C=O), rotamers]; *m/z* (ES) 426.2 [(M + Na)<sup>+</sup>, 46%], 390.2 (100) [Found [M + Na]<sup>+</sup> 426.0972. C<sub>19</sub>H<sub>25</sub>FeNNaO<sub>5</sub> requires M + Na, 426.0980]; **23**: *R<sub>f</sub>* (EtOAc plus 1% Et<sub>3</sub>N) 0.30;  $\nu_{\max}(\text{film})/\text{cm}^{-1}$  2936s, 2861m, 2800m, 2052s (CO), 1978s br (CO), 1675s (C=O), 1493m, 1461s,

1441m, 1381m, 1296m, 1174m, 1032m;  $\delta_{\text{H}}$ (300 MHz;  $\text{CDCl}_3$ ) 0.99 (3H, t,  $J$  7.0,  $\text{CH}_2\text{CH}_3$ ), 1.17-1.30 (3H, stack, C(2) $H$ , C(5) $H$ , C(9) $H_a$ ), 1.38-1.60 (8H, stack, including [1.45 (3H, d,  $J$  5.5, C(1) $H_3$ ], C(8) $H_2$ , C(9) $H_b$ , C(10) $H_2$ , C(1) $H_3$ ), 2.30-2.42 (4H, stack, C(7) $H_2$ , C(11) $H_2$ ), 2.49 (2H, q,  $J$  7.0,  $\text{CH}_2\text{CH}_3$ ), 3.06 (2H, d,  $J$  6.6,  $\text{CH}_2\text{CH}=\text{CH}_2$ ), 5.04-5.18 (2H, stack,  $\text{CH}_2\text{CH}=\text{CH}_a\text{H}_b$ ), 5.22 (1H, dd,  $J$  8.1, 5.2, C(3) $H$ ), 5.71-5.92 (2H, stack, including [5.76 (1H, dd,  $J$  8.1, 5.2, C(4) $H$ ],  $\text{CH}_2\text{CH}=\text{CH}_2$ , C(4) $H$ );  $\delta_{\text{C}}$ (75 MHz;  $\text{CDCl}_3$ ) 11.6 ( $\text{CH}_3$ ,  $\text{CH}_2\text{CH}_3$ ), 19.1 ( $\text{CH}_3$ , C1), [24.6, 26.7, 27.2 (3 x  $\text{CH}_2$ , C8, C9, C10)], 42.6 ( $\text{CH}_2$ , C7), 47.2 ( $\text{CH}_2$ ,  $\text{NCH}_2$ ), 52.9 ( $\text{CH}_2$ ,  $\text{NCH}_2$ ), 53.5 ( $\text{CH}$ , C2 or C5), 56.7 ( $\text{CH}_2$ ,  $\text{NCH}_2$ ), 59.2 ( $\text{CH}$ , C5 or C2), [81.3, 88.6 (2 x  $\text{CH}$ , C3, C4)], 117.0 ( $\text{CH}_2$ ,  $\text{CH}_2\text{CH}=\text{CH}_2$ ), 135.9 ( $\text{CH}$ ,  $\text{CH}_2\text{CH}=\text{CH}_2$ ), 205.5 ( $\text{C}_{\text{quat}}$ ,  $\text{C}=\text{O}$ );  $m/z$  (ES) 390.2 [( $\text{M} + \text{H}$ ) $^+$ , 100%], 362.2 (12,  $\text{M} - \text{CO} + \text{H}$ ), 306.2 (54,  $\text{M} - 3\text{CO} + \text{H}$ ), 250.3 (8,  $\text{M} - \text{Fe}(\text{CO})_3 + \text{H}$ ) [Found [ $\text{M} + \text{H}$ ] $^+$  390.1373.  $\text{C}_{19}\text{H}_{28}\text{FeNO}_4$  requires  $\text{M} + \text{H}$ , 390.1368].

### Synthesis of Boc-Protected Amines used to prepare 7af and 7ag

#### (*E*)-3-Azido-1-bromo-2-methylprop-1-ene and (*Z*)-3-azido-1-bromo-2-methylprop-1-ene.

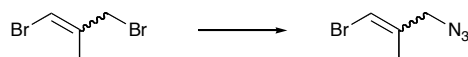

A solution of 1,3-dibromo-2-methylprop-1-ene<sup>5</sup> (500 mg, 2.34 mmol) in acetone (4 mL) was added to a stirred suspension of  $\text{NaN}_3$  (760 g, 11.70 mmol) in acetone (11 mL). The reaction mixture was stirred at rt for 15 min and then warmed to 60 °C. After 2 h, the reaction mixture was cooled to rt, and the solvent removed under reduced pressure. The residue was partitioned between  $\text{H}_2\text{O}$  (20 mL) and  $\text{Et}_2\text{O}$  (20 mL) and the aqueous phase was extracted with  $\text{Et}_2\text{O}$  (3 x 20 mL). The combined organic phases were dried ( $\text{Na}_2\text{SO}_4$ ) and concentrated under reduced pressure to yield 3-azido-1-bromo-2-methylprop-1-ene as a pale oil (0.35 g, 85%, mixture of (*E*)/(*Z*) isomers, 1.7:1), which was used directly in the next step (see immediately

below) without further purification;  $R_f$  (hexane) 0.23;  $\nu_{\max}(\text{film})/\text{cm}^{-1}$  3072w, 2977w, 2918m, 2852w, 2104s br ( $\text{N}_3$ ), 1734w, 1634m, 1439s, 1380m, 1335s, 1295s, 1266s, 1221m, 1166m;  $\delta_{\text{H}}(300 \text{ MHz}; \text{CDCl}_3; \text{major isomer})$  1.84 (3H, s,  $\text{CH}_3$ ), 3.78 (2H, s,  $\text{CH}_2$ ), 6.25-6.29 (1H, m, =CH);  $\delta_{\text{H}}(300 \text{ MHz}; \text{CDCl}_3; \text{minor isomer})$  1.90 (3H, s,  $\text{CH}_3$ ), 3.99 (2H, s,  $\text{CH}_2$ ), 6.15 (1H, s, =CH);  $\delta_{\text{C}}(75 \text{ MHz}; \text{CDCl}_3; \text{major isomer})$  17.5 ( $\text{CH}_3$ ), 56.7 ( $\text{CH}_2$ ,  $\text{CH}_2\text{N}_3$ ), 106.5 ( $\text{CH}$ , =CH), 136.3 ( $\text{C}_{\text{quat}}$ , =C);  $\delta_{\text{C}}(75 \text{ MHz}; \text{CDCl}_3; \text{minor isomer})$  20.7 ( $\text{CH}_3$ ), 52.9 ( $\text{CH}_2$ ,  $\text{CH}_2\text{N}_3$ ), 104.9 ( $\text{CH}$ , =CH), 135.9 ( $\text{C}_{\text{quat}}$ , =C);  $m/z$  (EI) 135 {[M (Br 81) - Br] $^+$ , 77%}, 133 (79, M (Br 79) - Br), 53 (100,  $\text{C}_4\text{H}_5^+$ ).

**(E)-1-Bromo-3-[N-(tert-butoxycarbonyl)amino]-2-methylprop-1-ene and (Z)-1-bromo-3-[N-(tert-butoxycarbonyl)amino]-2-methylprop-1-ene.**

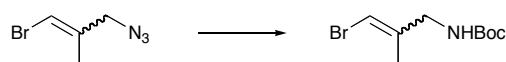

$\text{PPh}_3$  (3.04 g, 11.60 mmol) and  $\text{Boc}_2\text{O}$  (1.26 g, 5.79 mmol) were added sequentially to a stirred solution of 3-azido-1-bromo-2-methylprop-1-ene (0.68 g, 3.86 mmol) in  $t\text{BuOH}$  (20 mL). The reaction mixture was stirred at rt for 2 d, and then the solvent removed under reduced pressure. The residue was purified by  $\text{SiO}_2$  column chromatography (hexane/ $\text{Et}_2\text{O}$ , 3:1) to yield 1-bromo-3-[N-(tert-butoxycarbonyl)amino]-2-methylprop-1-ene as a colourless oil, which solidified upon standing to yield a white solid (0.43 g, 45%, mixture of (E)/(Z) isomers, 4.5:1);  $R_f$  ( $\text{Et}_2\text{O}$ ) 0.41; (Found: C, 43.47; H, 6.47; N, 5.38.  $\text{C}_9\text{H}_{16}\text{BrNO}_2$  requires C, 43.22; H, 6.45; N, 5.60%); m.p. 70-72 °C (from hexane/ $\text{Et}_2\text{O}$ );  $\nu_{\max}(\text{film})/\text{cm}^{-1}$  3336s (N-H), 2981m, 2932m, 1810m, 1759m, 1676s (C=O), 1526m, 1455m, 1367s, 1250m, 1171s, 1119s, 1068s;  $\delta_{\text{H}}(300 \text{ MHz}; \text{CDCl}_3; \text{major isomer})$  1.42 (9H, s,  $\text{C}(\text{CH}_3)_3$ ), 1.75 (3H, s,  $\text{CH}_3$ ), 3.67-3.77 (2H, m,  $\text{CH}_2$ ), 4.67 (1H, s (br), NH), 6.05-6.11 (1H, m, =CH);  $\delta_{\text{H}}(300 \text{ MHz}; \text{CDCl}_3; \text{minor isomer})$  selected data: 1.80 (3H, s,  $\text{CH}_3$ ), 3.86-3.93 (2H, m,  $\text{CH}_2$ ), 5.92-5.97 (1H, m, =CH);  $\delta_{\text{C}}(100 \text{ MHz}; \text{CDCl}_3; \text{major isomer})$  17.0 ( $\text{CH}_3$ ), 28.0 ( $\text{CH}_3$ ,  $\text{C}(\text{CH}_3)_3$ ), 46.2 ( $\text{CH}_2$ ), 85.1 ( $\text{C}_{\text{quat}}$ ,  $\text{C}(\text{CH}_3)_3$ ), 104.0 ( $\text{CH}$ , =CH), 139.4 ( $\text{C}_{\text{quat}}$ , =C), 156.1 ( $\text{C}_{\text{quat}}$ , C=O);  $\delta_{\text{C}}(100 \text{ MHz}; \text{CDCl}_3; \text{minor isomer})$  selected data: 20.2 ( $\text{CH}_3$ ), 27.0 ( $\text{CH}_3$ ,  $\text{C}(\text{CH}_3)_3$ ), 42.9 ( $\text{CH}_2$ ), 79.6

(C<sub>quat</sub>, C(CH<sub>3</sub>)<sub>3</sub>), 102.6 (CH, =CH), 147.1 (C<sub>quat</sub>, =C); *m/z* (ES) 274.0 {[M (Br 81) + Na]<sup>+</sup>, 90%}, 272.0 [100, M (Br 79) + Na] [Found [M (Br 79) + Na]<sup>+</sup> 272.0252. C<sub>9</sub>H<sub>16</sub>BrNNaO<sub>2</sub> requires M (Br 79) + Na, 272.0262].

**(2Z)-1-[N-(tert-Butoxycarbonyl)]-2-tributylstannyl-3-trimethylsilanyl-prop-2-enylamine.**

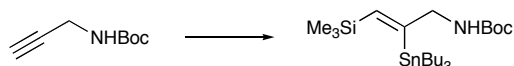

Trimethylsilyltributylstannane<sup>6</sup> (683 mg, 1.88 mmol) was added over 1 min to a degassed solution of PCy<sub>3</sub> (19 mg, 0.07 mmol), 1-[N-(tert-butoxycarbonyl)amino]prop-2-yne<sup>7</sup> (270 mg, 1.71 mmol), and Pd<sub>2</sub>(dba)<sub>3</sub> (31 mg, 0.03 mmol) in benzene (18 mL) at rt. The reaction mixture was heated at 80 °C. After stirring for 1 h, the reaction mixture was cooled to rt, and the solvent removed under reduced pressure. The residue was purified by SiO<sub>2</sub> column chromatography (hexane/Et<sub>2</sub>O, 10:1) to yield (2Z)-1-[N-(tert-butoxycarbonyl)]-2-tributylstannyl-3-trimethylsilyl-prop-2-enylamine as a pale oil (504 mg, 57%); *R<sub>f</sub>* (hexane/Et<sub>2</sub>O, 10:1) 0.34; (Found C, 53.19; H, 9.67; N, 2.71. C<sub>23</sub>H<sub>49</sub>NO<sub>2</sub>SiSn requires C, 53.28; H, 9.53; N, 2.70%);  $\nu_{\max}$ (film)/cm<sup>-1</sup> 3453m (N-H), 3364m br (N-H), 2956s, 2922s, 1705s (C=O), 1496m, 1456m, 1366m, 1247s, 1170s, 1048m;  $\delta_{\text{H}}$ (300 MHz; CDCl<sub>3</sub>) 0.09 (9H, s, Si(CH<sub>3</sub>)<sub>3</sub>), 0.83-0.99 (15H, stack, including [0.88 (9H, t, *J* 7.2, 3 x CH<sub>2</sub>CH<sub>3</sub>), 3 x CH<sub>2</sub>CH<sub>3</sub>), 1.24-1.50 (21H, stack, including [1.44 (9H, s, C(CH<sub>3</sub>)<sub>3</sub>), Sn(CH<sub>2</sub>CH<sub>2</sub>CH<sub>2</sub>CH<sub>3</sub>)<sub>3</sub>, C(CH<sub>3</sub>)<sub>3</sub>), 3.75-3.94 (2H, m, CH<sub>2</sub>N), 4.43 (1H, s (br), NH), 6.47 (1H, s, =CH);  $\delta_{\text{C}}$ (75 MHz; CDCl<sub>3</sub>) 0.1 (CH<sub>3</sub>, Si(CH<sub>3</sub>)<sub>3</sub>), 10.9 (CH<sub>2</sub>, s, (and 2 x d satellites, <sup>1</sup>J<sub>C-<sup>119</sup>Sn</sub> 329.3, <sup>1</sup>J<sub>C-<sup>117</sup>Sn</sub> 314.7), SnCH<sub>2</sub>), 13.6 (CH<sub>3</sub>, Sn(CH<sub>2</sub>)<sub>3</sub>CH<sub>3</sub>), 27.4 (CH<sub>2</sub>, s, (and 2 x d satellites, <sup>2</sup>J<sub>C-<sup>119</sup>Sn</sub> 61.8, <sup>2</sup>J<sub>C-<sup>117</sup>Sn</sub> 59.2), SnCH<sub>2</sub>CH<sub>2</sub>), 28.4 (CH<sub>3</sub>, C(CH<sub>3</sub>)<sub>3</sub>), 29.1 (CH<sub>2</sub>, s, (and d satellite, <sup>3</sup>J<sub>C-<sup>119</sup>Sn</sub> 19.3), Sn(CH<sub>2</sub>)<sub>2</sub>CH<sub>2</sub>CH<sub>3</sub>), 54.0 (CH<sub>2</sub>, CH<sub>2</sub>N), 79.0 (C<sub>quat</sub>, C(CH<sub>3</sub>)<sub>3</sub>), 142.9 (CH, =CH), 155.3 (C<sub>quat</sub>, C=O), 160.1 (C<sub>quat</sub>, C=CH); *m/z* (ES) 542.5 [(M + Na)<sup>+</sup>, 100%], 442.4 (32, M – Boc + Na) [Found [M + Na]<sup>+</sup> 542.2432. C<sub>23</sub>H<sub>49</sub>NNaO<sub>2</sub>SiSn requires M + Na, 542.2452].

**(2Z)-2-bromo-1-[N-(tert-butoxycarbonyl)]-3-trimethylsilyl-prop-2-enylamine.**

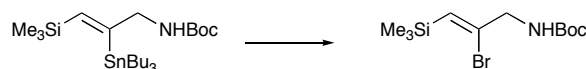

CuBr<sub>2</sub> (142 mg, 0.64 mmol) was added to a stirred solution of (2Z)-1-[N-(tert-butoxycarbonyl)]-2-tributylstannyl-3-trimethylsilyl-prop-2-enylamine (150 mg, 0.29 mmol) in THF (1 mL). The mixture was stirred for 14 h, and then passed through a short SiO<sub>2</sub> pad, and washed with Et<sub>2</sub>O (30 mL). Concentration under reduced pressure, and purification of the residue by SiO<sub>2</sub> column chromatography (hexane/Et<sub>2</sub>O, 5:1) yielded (2Z)-2-bromo-1-[N-(tert-butoxycarbonyl)]-3-trimethylsilyl-prop-2-enylamine as a pale brown oil (75 mg, 84%); *R<sub>f</sub>* (hexane/Et<sub>2</sub>O, 5:1) 0.32;  $\nu_{\max}(\text{film})/\text{cm}^{-1}$  3339s (N-H), 2957s, 1698s (C=O), 1614s, 1520s, 1455m, 1417m, 1392m, 1367s, 1336w, 1249s, 1171s, 1053m;  $\delta_{\text{H}}(300 \text{ MHz}; \text{CDCl}_3)$  0.18 (9H, s, Si(CH<sub>3</sub>)<sub>3</sub>), 1.45 (9H, s, C(CH<sub>3</sub>)<sub>3</sub>), 3.90-4.02 (2H, m, CH<sub>2</sub>N), 4.89 (1H, s (br), NH), 6.20 (1H, s, =CH);  $\delta_{\text{C}}(75 \text{ MHz}; \text{CDCl}_3)$  -1.1 (CH<sub>3</sub>, Si(CH<sub>3</sub>)<sub>3</sub>), 28.2 (CH<sub>3</sub>, C(CH<sub>3</sub>)<sub>3</sub>), [51.5, 52.8 (CH<sub>2</sub>, CH<sub>2</sub>N), rotamers], 79.7 (C<sub>quat</sub>, C(CH<sub>3</sub>)<sub>3</sub>), [127.4, 127.9 (CH, =CH), rotamers], 138.3 (C<sub>quat</sub>, =C), 155.3 (C<sub>quat</sub>, C=O); *m/z* (ES) 332.0 {[M (Br 81) + Na]<sup>+</sup>, 96%}, 330.0 [100, M (Br 79) + Na], 275.9 [37, M (Br 81) - <sup>t</sup>Bu + H + Na], 274.0 [42, [M (Br 79) - <sup>t</sup>Bu + H + Na] [Found [M (Br 79) + Na]<sup>+</sup> 330.0502. C<sub>11</sub>H<sub>22</sub>BrNNaO<sub>2</sub>Si requires *M* (Br 79) + Na 330.0501].

**References:**

1. I. Williams, B. M. Kariuki, K. Reeves and L. R. Cox, *Org. Lett.*, 2006, **8**, 4389-4392.
2. R. L. Hanson, M. D. Schwinden, A. Banerjee, D. B. Brzozowski, B.-C. Chen, B. P. Patel, C. G. McNamee, G. A. Kodersha, D. R. Kronenthal, R. N. Patel and L. J. Szarka, *Bioorg. Med. Chem.*, 1999, **7**, 2247-2252.
3. J. Guan, D. E. Kyle, L. Gerena, Q. Zhang, W. K. Milhous and A. J. Lin, *J. Med. Chem.*, 2002, **45**, 2741-2748.

4. Sheldrick, G.M. SHELXL. Program package for crystal structure determination. University of Gottingen, Germany.
5. R. A. Walsh and A. T. Bottini, *J. Org. Chem.*, 1970, **35**, 1086-1092.
6. S. Warren, A. Chow, G. Fraenkel and T. V. RajanBabu, 2003, **125**, 15402-15410.
7. T. T. Denton, X. Zhang and J. R. Cashman, *J. Am. Chem. Soc.*, 2005, **48**, 224-239.
